# Supplementary material for: TU-Tagging: A Method for Identifying Layer-Enriched Neuronal Genes in Developing Mouse Visual Cortex
Source: eNeuro. 2017 Oct 4;4(5):ENEURO.0181-17.2017. doi: 10.1523/ENEURO.0181-17.2017 (PMC5659240; doi:10.1523/ENEURO.0181-17.2017)
Supplement: Table 1-2 [file enu005172418so6.xlsx]

## Sheet: Sepw_WT_Sepwenr_1907_publish
Ensembl_id	Gene_symbol	baseMean	baseMeanA	baseMeanB	foldChange	log2FoldChange	pval	padj
ENSMUSG00000046229	Scand1	13.3687	0	26.7374	Inf	Inf	2.39425e-09	3.86479e-07
ENSMUSG00000034863	Ano8	147.797	0.426612	295.168	691.889	9.4344	5.08234e-25	7.05988e-21
ENSMUSG00000056501	Cebpb	26.7007	0.304273	53.0972	174.505	7.44713	1.65513e-11	4.99812e-09
ENSMUSG00000050138	Kcnk12	72.6379	1.03516	144.241	139.342	7.12248	6.78059e-17	1.04655e-13
ENSMUSG00000060275	Nrg2	34.5243	0.831466	68.2171	82.0443	6.35833	2.59255e-12	1.02894e-09
ENSMUSG00000056665	Them6	16.4481	0.404854	32.4914	80.2546	6.32651	3.86818e-09	5.73271e-07
ENSMUSG00000050896	Rtn4rl2	65.9603	2.0268	129.894	64.0882	6.00199	2.42974e-14	1.7764e-11
ENSMUSG00000072875	Gpr27	61.6965	1.9672	121.426	61.725	5.94778	2.77898e-14	1.93014e-11
ENSMUSG00000037843	Vstm2l	57.7248	2.39382	113.056	47.2283	5.56158	1.44069e-13	8.70115e-11
ENSMUSG00000044927	H1fx	15.8768	0.709127	31.0444	43.7784	5.45215	2.90783e-08	2.80505e-06
ENSMUSG00000038037	Socs1	6.79325	0.304273	13.2822	43.6523	5.44799	1.61296e-05	0.000450818
ENSMUSG00000034685	Fam171a2	109.345	4.90682	213.782	43.5684	5.44521	2.49649e-15	2.47705e-12
ENSMUSG00000037166	Ppp1r14a	17.6141	0.831466	34.3968	41.3689	5.37047	8.45778e-09	1.03575e-06
ENSMUSG00000036867	Smad6	8.33165	0.404854	16.2584	40.1588	5.32764	3.03396e-06	0.000123389
ENSMUSG00000002603	Tgfb1	23.1705	1.13574	45.2053	39.8025	5.31479	2.26702e-09	3.70484e-07
ENSMUSG00000095098	Ccdc85b	64.533	3.5078	125.558	35.794	5.16165	5.06564e-13	2.42644e-10
ENSMUSG00000034271	Jdp2	223.162	12.1857	434.139	35.6269	5.1549	1.88549e-17	5.23826e-14
ENSMUSG00000096753	Fam181a	11.0505	0.608546	21.4925	35.3178	5.14233	9.07798e-07	4.7766e-05
ENSMUSG00000050222	Il17d	47.6171	2.65457	92.5797	34.8755	5.12414	1.42225e-11	4.59453e-09
ENSMUSG00000036620	Mgat4b	219.621	12.816	426.427	33.273	5.05628	4.83824e-17	8.401e-14
ENSMUSG00000070003	Ssbp4	157.636	9.24862	306.024	33.0886	5.04826	1.17208e-15	1.35678e-12
ENSMUSG00000042388	Dlgap3	275.266	16.3046	534.227	32.7655	5.0341	5.61566e-18	2.60024e-14
ENSMUSG00000034974	Dapk3	79.9403	4.74918	155.131	32.6649	5.02967	9.4009e-13	4.16937e-10
ENSMUSG00000054716	Zfp771	117.352	7.01244	227.692	32.4698	5.02103	3.19071e-14	2.11058e-11
ENSMUSG00000070720	Tmem200b	9.85611	0.608546	19.1037	31.3923	4.97234	4.47999e-06	0.000165509
ENSMUSG00000020331	Hcn2	102.171	6.4039	197.939	30.9091	4.94996	1.15809e-13	7.3123e-11
ENSMUSG00000001227	Sema6b	293.141	18.8207	567.462	30.1509	4.91413	7.82796e-18	2.71845e-14
ENSMUSG00000093910	Zfp853	9.38716	0.608546	18.1658	29.8511	4.89971	5.28709e-06	0.000185462
ENSMUSG00000049036	Tmem121	151.877	10.023	293.731	29.3057	4.87311	8.61353e-15	7.03827e-12
ENSMUSG00000045045	Lrfn4	276.008	18.2743	533.741	29.2072	4.86825	4.41053e-17	8.401e-14
ENSMUSG00000029725	Ppp1r35	15.2107	1.03516	29.3863	28.3882	4.82722	2.26093e-07	1.47449e-05
ENSMUSG00000071076	Jund	170.778	12.1857	329.371	27.0293	4.75645	9.41173e-15	7.26324e-12
ENSMUSG00000002083	Bbc3	55.4147	3.99147	106.838	26.7666	4.74236	2.51935e-11	7.44602e-09
ENSMUSG00000048696	Mex3d	90.3294	6.75169	173.907	25.7576	4.68692	2.25206e-12	9.20099e-10
ENSMUSG00000032174	Icam5	267.485	20.2172	514.753	25.4611	4.67022	2.94658e-16	4.09309e-13
ENSMUSG00000047654	Tssk6	7.83036	0.608546	15.0522	24.7346	4.62846	2.05913e-05	0.000551124
ENSMUSG00000054871	Tmem158	236.303	18.617	453.988	24.3856	4.60796	1.78838e-15	1.91095e-12
ENSMUSG00000052296	Ppp6r1	624.173	49.6617	1198.69	24.137	4.59318	1.04097e-19	7.23004e-16
ENSMUSG00000025902	Sox17	26.1604	2.1709	50.1498	23.101	4.52988	1.70494e-08	1.83592e-06
ENSMUSG00000011096	Akt1s1	111.877	9.38957	214.364	22.83	4.51286	3.77227e-12	1.30045e-09
ENSMUSG00000049551	Fzd9	31.6895	2.67633	60.7027	22.6813	4.50343	4.16135e-09	6.02138e-07
ENSMUSG00000048385	Scrt1	35.5168	3.06196	67.9716	22.1987	4.4724	5.71527e-09	7.70072e-07
ENSMUSG00000030397	Mark4	61.3951	5.41226	117.378	21.6874	4.43879	1.17003e-10	2.95508e-08
ENSMUSG00000089762	Ier5l	13.0202	1.1575	24.8829	21.4971	4.42607	1.57615e-06	7.54977e-05
ENSMUSG00000090877	Hspa1b	12.4936	1.11398	23.8733	21.4306	4.4216	2.66843e-06	0.000111985
ENSMUSG00000060860	Ube2s	22.1321	1.98896	42.2752	21.2549	4.40972	3.64171e-08	3.26405e-06
ENSMUSG00000024193	Phf1	32.02	2.90178	61.1381	21.0692	4.39706	9.1221e-09	1.08304e-06
ENSMUSG00000034730	Bai1	289.172	26.3437	552.001	20.9538	4.38914	3.79466e-15	3.29447e-12
ENSMUSG00000044216	Kcnj4	161.875	14.7993	308.95	20.876	4.38377	4.06193e-13	2.08979e-10
ENSMUSG00000027434	Nkx2-2	7.49196	0.709127	14.2748	20.1301	4.33128	2.7457e-05	0.000690809
ENSMUSG00000052837	Junb	138.455	13.3656	263.544	19.7181	4.30145	9.60476e-13	4.16937e-10
ENSMUSG00000013858	Tmem259	138.421	13.4053	263.436	19.6516	4.29658	3.52797e-12	1.29714e-09
ENSMUSG00000024955	Esrra	125.002	12.3708	237.633	19.2092	4.26373	3.61509e-12	1.29714e-09
ENSMUSG00000066607	6030419C18Rik	26.8125	2.6571	50.9678	19.1817	4.26166	8.63119e-08	6.58768e-06
ENSMUSG00000019194	Scn1b	203.342	20.2876	386.396	19.0459	4.25141	3.09752e-13	1.65491e-10
ENSMUSG00000038390	Gpr162	214.255	21.8335	406.677	18.6263	4.21927	2.46523e-13	1.42686e-10
ENSMUSG00000028782	Bai2	333.108	34.0498	632.167	18.566	4.21459	3.23572e-15	2.99649e-12
ENSMUSG00000076431	Sox4	568.306	58.6561	1077.96	18.3775	4.19987	2.86644e-17	6.63629e-14
ENSMUSG00000028661	Epha8	59.928	6.24625	113.61	18.1885	4.18495	1.21021e-09	2.21696e-07
ENSMUSG00000071341	Egr4	95.2516	10.0533	180.45	17.9494	4.16586	3.50442e-11	9.93467e-09
ENSMUSG00000037579	Kcnh3	439.418	46.5256	832.311	17.8893	4.16103	9.1677e-16	1.15771e-12
ENSMUSG00000026121	Sema4c	93.2546	10.0776	176.432	17.5074	4.12989	6.43719e-11	1.74021e-08
ENSMUSG00000052135	Foxo6	50.2207	5.45577	94.9857	17.4101	4.12185	3.57847e-09	5.4031e-07
ENSMUSG00000002409	Dyrk1b	60.8419	6.6158	115.068	17.3929	4.12043	1.79823e-09	3.08386e-07
ENSMUSG00000042419	Nfkbil1	15.9286	1.74428	30.1128	17.2637	4.10967	1.79964e-06	8.4171e-05
ENSMUSG00000060257	Scrt2	16.6482	1.82311	31.4733	17.2636	4.10966	1.06766e-06	5.55464e-05
ENSMUSG00000036904	Fzd8	24.1477	2.6571	45.6383	17.1759	4.10232	3.03469e-07	1.87355e-05
ENSMUSG00000049295	Zfp219	68.8666	7.72978	130.003	16.8185	4.07198	9.22154e-10	1.78873e-07
ENSMUSG00000038777	Sema6c	33.7142	3.8146	63.6138	16.6764	4.05974	5.22083e-08	4.24108e-06
ENSMUSG00000084845	Tmem240	86.1737	10.0665	162.281	16.1208	4.01085	2.95217e-10	6.83477e-08
ENSMUSG00000020734	Grin2c	37.3559	4.42062	70.2911	15.9007	3.99102	2.95374e-08	2.81922e-06
ENSMUSG00000087408	Cers1	137.476	16.4455	258.507	15.719	3.97444	6.51437e-11	1.74021e-08
ENSMUSG00000023991	Foxp4	51.6055	6.18666	97.0243	15.6828	3.97111	7.2091e-09	9.27237e-07
ENSMUSG00000022577	Ly6h	134.083	16.5512	251.615	15.2023	3.92621	1.59675e-10	3.9608e-08
ENSMUSG00000043614	Vps37d	60.1525	7.4665	112.839	15.1127	3.91769	3.15165e-09	4.81094e-07
ENSMUSG00000035172	Plekhh3	25.1778	3.1843	47.1713	14.8137	3.88886	3.15093e-07	1.93671e-05
ENSMUSG00000043165	Lor	13.6938	1.74428	25.6433	14.7013	3.87787	7.62544e-06	0.000246337
ENSMUSG00000079654	Prrt4	22.8943	2.98314	42.8055	14.3492	3.8429	1.38298e-06	6.75439e-05
ENSMUSG00000051703	Tmem198	258.959	33.8562	484.062	14.2976	3.8377	3.64182e-12	1.29714e-09
ENSMUSG00000054000	Tusc1	36.18	4.78763	67.5724	14.1139	3.81905	4.16576e-08	3.60772e-06
ENSMUSG00000024873	Cnih2	370.567	49.9054	691.228	13.8508	3.79189	2.73369e-13	1.51895e-10
ENSMUSG00000043843	Tmem145	133.603	18.4998	248.707	13.4438	3.74887	3.40408e-10	7.65812e-08
ENSMUSG00000050357	Rltpr	71.0156	9.8354	132.196	13.4408	3.74855	7.32021e-09	9.32891e-07
ENSMUSG00000042540	Acot5	7.42263	1.03516	13.8101	13.341	3.7378	0.000111346	0.00205346
ENSMUSG00000048616	Nog	19.7083	2.75768	36.6589	13.2933	3.73263	3.07689e-06	0.00012461
ENSMUSG00000052759	Gpr25	7.24177	1.0134	13.4701	13.292	3.73249	0.000168136	0.00282415
ENSMUSG00000041930	Fam222a	9.52129	1.33943	17.7032	13.2169	3.72431	5.21961e-05	0.00114182
ENSMUSG00000046719	Nxph3	44.719	6.34684	83.0911	13.0917	3.71059	5.92358e-08	4.70197e-06
ENSMUSG00000032338	Hcn4	23.9792	3.42897	44.5295	12.9862	3.69891	8.84828e-07	4.69128e-05
ENSMUSG00000087006	Gm13889	131.613	18.9995	244.226	12.8543	3.68418	9.44121e-10	1.79655e-07
ENSMUSG00000000531	Grasp	74.7637	10.8002	138.727	12.8448	3.68312	5.13144e-09	7.20009e-07
ENSMUSG00000053166	Cdh22	34.2264	5.00994	63.4429	12.6634	3.66259	6.14542e-07	3.45612e-05
ENSMUSG00000049577	Zfpm1	17.5864	2.57575	32.5971	12.6554	3.66168	4.80992e-06	0.000172964
ENSMUSG00000040938	Slc16a11	42.4564	6.32508	78.5877	12.4248	3.63515	1.33773e-07	9.50561e-06
ENSMUSG00000003070	Efna2	85.2207	12.8409	157.601	12.2733	3.61745	4.43434e-09	6.35025e-07
ENSMUSG00000038319	Kcnh2	18.2984	2.75768	33.8391	12.2708	3.61716	7.69834e-06	0.000246969
ENSMUSG00000028010	Gar1	55.303	8.3711	102.235	12.2128	3.61033	4.02876e-08	3.51971e-06
ENSMUSG00000011751	Sptbn4	219.783	33.3407	406.225	12.1841	3.60692	5.74526e-11	1.59615e-08
ENSMUSG00000030590	Fam98c	22.8227	3.46681	42.1786	12.1664	3.60483	3.20286e-06	0.000127481
ENSMUSG00000039781	Cep131	62.2935	9.49015	115.097	12.128	3.60027	5.33903e-08	4.29388e-06
ENSMUSG00000006218	Fam131c	7.97303	1.21709	14.729	12.1018	3.59715	0.000208883	0.00337788
ENSMUSG00000039278	Pcsk1n	177.612	27.1502	328.073	12.0836	3.59498	3.41806e-10	7.65812e-08
ENSMUSG00000038415	Foxq1	16.8039	2.59751	31.0103	11.9385	3.57755	5.34149e-06	0.000186898
ENSMUSG00000045532	C1ql1	17.6285	2.75768	32.4993	11.785	3.55888	5.80527e-06	0.000199113
ENSMUSG00000033152	Podxl2	209.509	32.8576	386.161	11.7525	3.5549	6.82725e-11	1.78938e-08
ENSMUSG00000024325	Ring1	76.0654	12.1504	139.98	11.5206	3.52615	2.62169e-08	2.60128e-06
ENSMUSG00000028458	Tesk1	90.5782	14.5411	166.615	11.4583	3.51832	1.45769e-08	1.61991e-06
ENSMUSG00000033256	Shf	52.3069	8.43891	96.1749	11.3966	3.51053	1.21307e-07	8.77643e-06
ENSMUSG00000074405	Zfp865	58.4361	9.45293	107.419	11.3636	3.50635	3.99046e-08	3.50832e-06
ENSMUSG00000034334	Fam151b	42.6499	6.95853	78.3412	11.2583	3.49292	2.17542e-07	1.43478e-05
ENSMUSG00000040794	C1qtnf4	122.258	19.9912	224.525	11.2312	3.48944	5.538e-09	7.61667e-07
ENSMUSG00000000093	Tbx2	9.61294	1.58411	17.6418	11.1367	3.47725	5.16589e-05	0.00113423
ENSMUSG00000093593	Gm20683	13.6255	2.24972	25.0013	11.1131	3.47418	2.3738e-05	0.00061405
ENSMUSG00000045348	Nyap1	109.651	18.1583	201.144	11.0772	3.46953	3.87931e-09	5.73271e-07
ENSMUSG00000047085	Lrrc4b	191.515	31.9877	351.042	10.9743	3.45606	4.41054e-10	9.42567e-08
ENSMUSG00000043439	E130012A19Rik	41.3626	6.93615	75.789	10.9267	3.44978	8.38424e-07	4.47944e-05
ENSMUSG00000043398	Gpr135	60.4275	10.1646	110.691	10.8898	3.44491	6.73561e-08	5.22706e-06
ENSMUSG00000064264	Zfp428	58.6309	9.93599	107.326	10.8017	3.43319	1.29331e-07	9.2605e-06
ENSMUSG00000041658	Rragb	357.604	61.0973	654.111	10.7061	3.42036	2.67493e-11	7.74114e-09
ENSMUSG00000002968	Med25	183.245	31.9057	334.585	10.4867	3.39049	1.37275e-09	2.38362e-07
ENSMUSG00000010529	Gm266	9.37328	1.64117	17.1054	10.4227	3.38165	9.11295e-05	0.00176061
ENSMUSG00000060166	Zdhhc8	409.982	71.9845	747.98	10.3908	3.37724	1.50943e-11	4.65945e-09
ENSMUSG00000028042	Zbtb7b	20.0945	3.55131	36.6377	10.3167	3.3669	5.94557e-06	0.000202426
ENSMUSG00000020773	Trim47	27.7275	4.95034	50.5047	10.2023	3.35082	3.88194e-06	0.000148551
ENSMUSG00000043099	Hic1	10.4037	1.86662	18.9408	10.1471	3.34299	8.08998e-05	0.00161919
ENSMUSG00000093803	Ppp2r3d	27.5659	4.94781	50.1839	10.1427	3.34236	2.4322e-06	0.0001046
ENSMUSG00000044433	Camsap3	125.212	22.5136	227.911	10.1232	3.3396	8.78331e-09	1.06095e-06
ENSMUSG00000043445	Pgp	184.738	33.2209	336.255	10.1218	3.33939	2.2403e-09	3.70476e-07
ENSMUSG00000024247	Pkdcc	43.3672	7.80861	78.9259	10.1075	3.33736	7.2007e-07	3.90722e-05
ENSMUSG00000054793	Cadm4	107.129	19.3691	194.889	10.0619	3.33082	2.35657e-08	2.37211e-06
ENSMUSG00000057667	Bloc1s3	58.4485	10.6047	106.292	10.0231	3.32525	1.47776e-07	1.03154e-05
ENSMUSG00000060708	Bloc1s4	98.6609	18.0573	179.264	9.92751	3.31143	3.36645e-08	3.07654e-06
ENSMUSG00000047227	Gm527	31.6489	5.83887	57.4588	9.84075	3.29877	2.74148e-06	0.000114018
ENSMUSG00000040164	Kcns1	96.9189	17.9893	175.848	9.77519	3.28912	4.21275e-08	3.60772e-06
ENSMUSG00000055148	Klf2	44.8302	8.3358	81.3245	9.75606	3.2863	5.6516e-07	3.23072e-05
ENSMUSG00000020108	Ddit4	88.591	16.5083	160.674	9.73292	3.28287	1.07087e-07	7.99755e-06
ENSMUSG00000063130	Calml3	10.9775	2.04856	19.9064	9.71727	3.28055	0.0001435	0.00249794
ENSMUSG00000035890	Rnf126	98.5647	18.4569	178.673	9.68055	3.27509	3.25404e-08	3.01346e-06
ENSMUSG00000019158	Tmem160	75.334	14.1119	136.556	9.67664	3.27451	1.53475e-07	1.06066e-05
ENSMUSG00000046792	Zfp787	53.1676	10.0205	96.3147	9.61178	3.2648	4.92537e-07	2.85077e-05
ENSMUSG00000070570	Slc17a7	1274.26	240.461	2308.07	9.5985	3.26281	4.81107e-13	2.38681e-10
ENSMUSG00000024968	Rcor2	22.2101	4.1977	40.2224	9.58202	3.26033	1.81976e-05	0.00049957
ENSMUSG00000034684	Sema3f	36.311	6.89579	65.7262	9.53136	3.25268	2.4743e-06	0.000105454
ENSMUSG00000000202	Btbd17	82.7731	15.7427	149.804	9.51575	3.25032	6.02284e-08	4.7536e-06
ENSMUSG00000036957	Lrfn3	129.941	24.8447	235.038	9.46028	3.24188	1.77018e-08	1.87707e-06
ENSMUSG00000025375	Aatk	738.278	141.534	1335.02	9.43255	3.23765	3.83836e-12	1.30045e-09
ENSMUSG00000069227	Gprin1	853.07	164.798	1541.34	9.35292	3.22542	1.52372e-12	6.41392e-10
ENSMUSG00000041801	Phlda3	36.3337	7.05343	65.6139	9.30241	3.21761	1.73631e-06	8.17597e-05
ENSMUSG00000022623	Shank3	341.048	66.5199	615.576	9.25401	3.21008	4.31391e-10	9.36321e-08
ENSMUSG00000020019	Ntn4	125.562	24.8472	226.278	9.10676	3.18694	3.43273e-08	3.1166e-06
ENSMUSG00000051403	Ppp1r37	142.701	28.2942	257.109	9.08697	3.1838	4.32622e-08	3.64215e-06
ENSMUSG00000020167	Tcf3	83.3135	16.6095	150.018	9.03205	3.17505	1.34359e-07	9.50561e-06
ENSMUSG00000023009	Nckap5l	119.628	23.912	215.345	9.00571	3.17084	8.22612e-08	6.31321e-06
ENSMUSG00000003436	Dll3	8.1047	1.62195	14.5875	8.9938	3.16893	0.000567043	0.00736149
ENSMUSG00000023266	Frs3	44.5103	8.92259	80.098	8.977	3.16623	1.74539e-06	8.19093e-05
ENSMUSG00000044030	Irf2bp1	228.918	46.1125	411.723	8.92866	3.15844	5.82086e-09	7.70072e-07
ENSMUSG00000002393	Nr2f6	32.4316	6.53445	58.3287	8.92634	3.15807	4.39809e-06	0.000163791
ENSMUSG00000074576	Mocs3	43.3248	8.76494	77.8847	8.88594	3.15152	3.20412e-06	0.000127481
ENSMUSG00000054452	Aes	328.224	66.7211	589.727	8.83868	3.14383	1.9395e-09	3.24598e-07
ENSMUSG00000040724	Kcna2	449.206	91.3398	807.073	8.83594	3.14338	2.44823e-10	5.8635e-08
ENSMUSG00000034949	Zfr2	251.901	51.5721	452.229	8.76888	3.13239	2.86663e-09	4.42448e-07
ENSMUSG00000035342	Lzts2	81.1184	16.6089	145.628	8.76809	3.13226	3.46329e-07	2.11002e-05
ENSMUSG00000079659	Tmem243	31.0246	6.38782	55.6613	8.71367	3.12328	5.87172e-06	0.000200403
ENSMUSG00000025318	Jph3	741.267	152.882	1329.65	8.69724	3.12056	1.46905e-11	4.63787e-09
ENSMUSG00000034889	Cactin	96.6262	20.0192	173.233	8.65334	3.11326	1.25053e-07	9.00061e-06
ENSMUSG00000029570	Lfng	90.298	18.7176	161.878	8.64845	3.11244	2.24049e-07	1.46805e-05
ENSMUSG00000090125	Pou3f1	340.498	70.7292	610.267	8.62821	3.10906	9.27136e-10	1.78873e-07
ENSMUSG00000018012	Rac3	134.097	27.9117	240.282	8.60864	3.10579	4.269e-08	3.6159e-06
ENSMUSG00000041986	Elmod1	1121.49	233.65	2009.33	8.59975	3.10429	2.94451e-12	1.13617e-09
ENSMUSG00000024912	Fosl1	8.93471	1.86662	16.0028	8.57312	3.09982	0.000297114	0.00443786
ENSMUSG00000044813	Shb	31.4973	6.61327	56.3813	8.52548	3.09178	8.63722e-06	0.000274553
ENSMUSG00000003378	Grik5	312.954	65.7694	560.139	8.51671	3.0903	8.14186e-10	1.61569e-07
ENSMUSG00000016528	Mapkapk2	162.147	34.2702	290.025	8.46289	3.08115	2.67517e-08	2.63552e-06
ENSMUSG00000033007	Asic4	20.1665	4.27652	36.0565	8.43128	3.07575	2.71232e-05	0.000683789
ENSMUSG00000040867	Begain	187.29	39.7433	334.836	8.42496	3.07467	2.96312e-08	2.81922e-06
ENSMUSG00000055633	Zfp580	81.8387	17.5024	146.175	8.35169	3.06207	7.03296e-07	3.83117e-05
ENSMUSG00000045318	Adra2c	12.704	2.71985	22.6882	8.34172	3.06034	0.000111511	0.00205346
ENSMUSG00000048001	Hes5	109.712	23.4917	195.932	8.34047	3.06013	1.20081e-07	8.77643e-06
ENSMUSG00000037428	Vgf	86.9015	18.6902	155.113	8.29916	3.05296	4.18788e-07	2.44428e-05
ENSMUSG00000003345	Csnk1g2	324.588	70.2601	578.915	8.2396	3.04257	4.05672e-09	5.93178e-07
ENSMUSG00000075227	Znhit2	60.5379	13.1338	107.942	8.21861	3.0389	1.38006e-06	6.75439e-05
ENSMUSG00000046058	Eid2	220.61	48.006	393.213	8.19092	3.03403	2.24497e-08	2.29301e-06
ENSMUSG00000021379	Id4	465.006	102.08	827.932	8.1106	3.01981	2.6402e-10	6.2161e-08
ENSMUSG00000021294	Kif26a	19.3959	4.26044	34.5314	8.10511	3.01883	2.51833e-05	0.000641873
ENSMUSG00000042675	Ypel3	387.904	86.0255	689.783	8.01836	3.00331	1.22889e-09	2.21696e-07
ENSMUSG00000038346	Zfp384	240.081	53.3823	426.781	7.9948	2.99906	1.08521e-08	1.26678e-06
ENSMUSG00000022568	Scrib	91.0015	20.285	161.718	7.97227	2.99499	7.02182e-07	3.83117e-05
ENSMUSG00000036422	Pcdh8	232.918	52.1453	413.69	7.93341	2.98794	1.91074e-08	2.01076e-06
ENSMUSG00000040860	Crocc	101.74	22.8583	180.621	7.90178	2.98218	2.81286e-07	1.76803e-05
ENSMUSG00000002771	Grin2d	70.5951	15.8805	125.31	7.89079	2.98017	1.99535e-06	9.02846e-05
ENSMUSG00000059852	Kcng2	50.9786	11.4983	90.4589	7.86713	2.97584	3.8402e-06	0.00014736
ENSMUSG00000047810	Ccdc88b	14.7456	3.32839	26.1629	7.86052	2.97462	0.00011932	0.00216432
ENSMUSG00000023908	Pkmyt1	25.4094	5.73829	45.0805	7.85609	2.97381	2.75862e-05	0.000691696
ENSMUSG00000002799	Jag2	113.418	25.6922	201.144	7.82897	2.96882	2.77575e-07	1.75263e-05
ENSMUSG00000029071	Dvl1	466.299	105.845	826.753	7.81095	2.9655	1.22407e-09	2.21696e-07
ENSMUSG00000025876	Unc5a	253.583	57.6446	449.522	7.79817	2.96313	1.31998e-08	1.50294e-06
ENSMUSG00000039989	Cbx4	244.544	55.7269	433.362	7.77653	2.95913	1.42811e-08	1.59983e-06
ENSMUSG00000033768	Nrxn2	317.956	72.4893	563.423	7.7725	2.95838	7.04468e-09	9.23186e-07
ENSMUSG00000030811	Fbxl19	78.1634	17.8342	138.493	7.76558	2.95709	1.36922e-06	6.75439e-05
ENSMUSG00000025735	Rhbdl1	11.2726	2.57575	19.9695	7.75288	2.95473	0.00022169	0.00353558
ENSMUSG00000025858	Get4	172.547	39.6837	305.41	7.6961	2.94413	1.41484e-07	9.92601e-06
ENSMUSG00000036459	Wtip	58.9587	13.5636	104.354	7.69368	2.94367	2.00866e-06	9.02988e-05
ENSMUSG00000061028	Clasrp	65.2806	15.1092	115.452	7.64115	2.93379	2.47125e-06	0.000105454
ENSMUSG00000049807	Arhgap23	357.688	82.9692	632.406	7.62218	2.9302	4.58802e-09	6.50329e-07
ENSMUSG00000029675	Eln	16.3233	3.79284	28.8538	7.60742	2.92741	0.000137338	0.00243026
ENSMUSG00000078794	Dact3	331.67	77.0894	586.25	7.60481	2.92691	8.26269e-09	1.03101e-06
ENSMUSG00000035953	Tmem55b	473.966	110.171	837.761	7.60421	2.9268	7.66491e-10	1.54309e-07
ENSMUSG00000041605	5730559C18Rik	8.86759	2.07032	15.6649	7.56641	2.91961	0.000910602	0.0105762
ENSMUSG00000046999	1110032F04Rik	223.857	52.39	395.325	7.5458	2.91567	3.20717e-08	3.01019e-06
ENSMUSG00000091735	Gpr62	17.8546	4.1977	31.5115	7.50685	2.90821	0.000141319	0.00247549
ENSMUSG00000049422	Chchd10	120.838	28.4761	213.2	7.48699	2.90439	6.3204e-07	3.52597e-05
ENSMUSG00000037907	Ankrd13b	269.966	63.7686	476.164	7.46706	2.90054	5.05976e-08	4.13442e-06
ENSMUSG00000029720	Gm20605	7.88489	1.86662	13.9032	7.44829	2.89691	0.000827052	0.00991898
ENSMUSG00000023951	Vegfa	335.325	79.6827	590.968	7.41651	2.89074	7.49111e-09	9.45991e-07
ENSMUSG00000078235	Fam43b	126.495	30.3434	222.646	7.33755	2.8753	5.23126e-07	3.01525e-05
ENSMUSG00000001802	Lrp3	437.326	105.026	769.625	7.32793	2.87341	2.78686e-09	4.34969e-07
ENSMUSG00000028439	Fam219a	155.162	37.3694	272.955	7.30425	2.86874	2.73847e-07	1.73699e-05
ENSMUSG00000030400	Ercc2	85.2215	20.5458	149.897	7.29576	2.86706	1.86461e-06	8.60506e-05
ENSMUSG00000023495	Pcbp4	255.623	61.8338	449.413	7.26807	2.86157	3.24614e-08	3.01346e-06
ENSMUSG00000022791	Tnk2	260.916	63.2606	458.571	7.24893	2.85777	3.64212e-08	3.26405e-06
ENSMUSG00000054204	Fam150b	8.9327	2.1709	15.6945	7.2295	2.8539	0.00101169	0.0114525
ENSMUSG00000037373	Ctbp1	738.818	180.024	1297.61	7.208	2.8496	5.51608e-10	1.12682e-07
ENSMUSG00000028626	Col9a2	31.3731	7.66198	55.0841	7.18929	2.84585	2.51187e-05	0.000641403
ENSMUSG00000054499	Dedd2	72.6272	17.7663	127.488	7.17581	2.84314	3.98466e-06	0.000151232
ENSMUSG00000020483	Dynll2	284.032	69.4926	498.572	7.17445	2.84287	3.06933e-08	2.90041e-06
ENSMUSG00000092118	Fancf	47.2946	11.6456	82.9436	7.12232	2.83235	5.77118e-06	0.000199103
ENSMUSG00000020211	Sf3a2	51.9229	12.7974	91.0484	7.1146	2.83078	6.034e-06	0.000203937
ENSMUSG00000007950	Abhd8	393.119	97.0182	689.221	7.10404	2.82864	2.22075e-08	2.28507e-06
ENSMUSG00000024590	Lmnb1	49.2238	12.1857	86.2619	7.07895	2.82353	1.30982e-05	0.000387122
ENSMUSG00000048826	Dact2	97.7388	24.3118	171.166	7.04044	2.81567	1.60254e-06	7.61147e-05
ENSMUSG00000033128	Gga1	156.308	39.2871	273.329	6.95723	2.79851	7.2618e-07	3.92505e-05
ENSMUSG00000022382	Wnt7b	63.733	16.0195	111.446	6.95691	2.79845	5.05976e-06	0.000178389
ENSMUSG00000050761	Gp1bb	50.1216	12.6148	87.6284	6.94645	2.79628	1.36991e-05	0.000401463
ENSMUSG00000078317	F8a	78.9285	19.8751	137.982	6.94244	2.79544	3.21204e-06	0.000127481
ENSMUSG00000035283	Adrb1	187.504	47.2791	327.728	6.93178	2.79323	2.0478e-07	1.36105e-05
ENSMUSG00000043811	Rtn4r	211.079	53.2271	368.93	6.93124	2.79311	1.20856e-07	8.77643e-06
ENSMUSG00000035431	Sstr1	213.589	54.208	372.969	6.88033	2.78248	1.56602e-07	1.07482e-05
ENSMUSG00000035203	Epn1	144.059	36.6697	251.449	6.85712	2.7776	1.30853e-06	6.63385e-05
ENSMUSG00000036492	Rnf39	11.4741	2.92354	20.0247	6.84948	2.77599	0.000500301	0.00666956
ENSMUSG00000047658	Gal3st3	241.438	62.035	420.84	6.78392	2.76212	1.75837e-07	1.19149e-05
ENSMUSG00000038502	Ptov1	333.738	85.7768	581.699	6.78154	2.76161	6.33958e-08	4.97531e-06
ENSMUSG00000020684	Rasl10b	257.356	66.1734	448.539	6.77823	2.76091	1.95704e-07	1.30699e-05
ENSMUSG00000068696	Gpr88	1008.18	259.244	1757.13	6.77787	2.76083	5.00224e-10	1.03711e-07
ENSMUSG00000044024	Rell2	50.6369	13.0497	88.2241	6.76063	2.75716	1.56083e-05	0.000441578
ENSMUSG00000029028	Lrrc47	277.03	71.4655	482.595	6.75284	2.7555	1.12695e-07	8.37135e-06
ENSMUSG00000030019	Fbxl14	103.284	26.6839	179.884	6.7413	2.75303	2.30775e-06	0.000101023
ENSMUSG00000024726	2410127L17Rik	23.5027	6.08355	40.9218	6.72663	2.74988	9.19805e-05	0.00177317
ENSMUSG00000005442	Cic	348.164	90.3799	605.949	6.70446	2.74512	5.34764e-08	4.29388e-06
ENSMUSG00000026837	Col5a1	98.843	25.6774	172.009	6.69882	2.74391	4.91297e-06	0.000174542
ENSMUSG00000044876	Zfp444	147.193	38.3216	256.065	6.68201	2.74028	5.26081e-07	3.01975e-05
ENSMUSG00000034201	Gas2l1	138.808	36.1977	241.418	6.66944	2.73757	1.67134e-06	7.89681e-05
ENSMUSG00000043323	Fbrsl1	202.693	53.1322	352.254	6.62976	2.72896	2.52794e-07	1.62572e-05
ENSMUSG00000036430	Tbcc	126.174	33.0768	219.27	6.62914	2.72882	1.36616e-06	6.75439e-05
ENSMUSG00000004054	Map3k11	69.8699	18.3184	121.421	6.62837	2.72865	5.56608e-06	0.000193296
ENSMUSG00000035735	Dagla	368.256	96.821	639.692	6.60695	2.72399	3.35435e-08	3.07654e-06
ENSMUSG00000037211	Spry1	117.68	30.9604	204.399	6.60196	2.72289	2.22201e-06	9.86132e-05
ENSMUSG00000090291	Lrrc10b	17.9787	4.74412	31.2132	6.57935	2.71795	0.00010287	0.00192424
ENSMUSG00000045319	Proser2	11.7076	3.10547	20.3097	6.53997	2.70928	0.000882	0.010313
ENSMUSG00000021054	Sgpp1	748.628	198.603	1298.65	6.53894	2.70906	2.63522e-09	4.15976e-07
ENSMUSG00000027637	1110008F13Rik	140.554	37.4948	243.614	6.49726	2.69983	1.3436e-06	6.71366e-05
ENSMUSG00000063160	Numbl	410.935	109.796	712.074	6.48545	2.69721	2.76554e-08	2.68644e-06
ENSMUSG00000042460	C1galt1	107.068	28.6132	185.523	6.48381	2.69684	3.36021e-06	0.000132982
ENSMUSG00000025128	Bhlhe22	526.773	141.014	912.532	6.47121	2.69404	8.3128e-09	1.03101e-06
ENSMUSG00000033510	Otud7a	255.551	68.4862	442.615	6.46284	2.69217	1.48903e-07	1.03421e-05
ENSMUSG00000041794	Myrip	414.428	111.484	717.372	6.43475	2.68588	2.18142e-08	2.26135e-06
ENSMUSG00000052684	Jun	684.685	184.32	1185.05	6.42932	2.68467	1.89589e-09	3.21169e-07
ENSMUSG00000054659	Pm20d2	14.1419	3.83383	24.4499	6.37741	2.67297	0.000413374	0.00576524
ENSMUSG00000006575	Rundc3a	471.434	128.601	814.267	6.33175	2.6626	3.8798e-08	3.45476e-06
ENSMUSG00000026475	Rgs16	59.9155	16.425	103.406	6.29564	2.65435	1.01262e-05	0.000315388
ENSMUSG00000049932	H2afx	110.509	30.3973	190.62	6.27096	2.64869	5.98189e-06	0.000202927
ENSMUSG00000051550	Zfp579	45.614	12.547	78.6809	6.27088	2.64867	3.87646e-05	0.000898963
ENSMUSG00000025020	Slit1	77.9156	21.4804	134.351	6.25458	2.64491	1.3759e-05	0.000402372
ENSMUSG00000020087	Tysnd1	165.91	46.1267	285.694	6.19368	2.6308	1.38579e-06	6.75439e-05
ENSMUSG00000003346	Abhd17a	368.375	102.578	634.173	6.18237	2.62816	1.57072e-07	1.07482e-05
ENSMUSG00000035969	Rusc2	791.782	220.761	1362.8	6.1732	2.62602	5.81029e-09	7.70072e-07
ENSMUSG00000043857	Mgat5b	265.33	74.4225	456.237	6.13036	2.61597	2.84643e-07	1.78107e-05
ENSMUSG00000096606	Gm4980	17.8006	4.99386	30.6073	6.129	2.61565	0.000363759	0.00522002
ENSMUSG00000025223	Ldb1	295.719	83.4495	507.988	6.08737	2.60582	3.86849e-07	2.29748e-05
ENSMUSG00000042854	Trp53rk	30.5715	8.63754	52.5054	6.07875	2.60377	9.59952e-05	0.00182667
ENSMUSG00000025402	Nab2	90.8186	25.6648	155.972	6.07729	2.60343	9.69306e-06	0.000303942
ENSMUSG00000031323	Dmrtc1a	14.2064	4.01576	24.3971	6.07533	2.60296	0.000642556	0.00814392
ENSMUSG00000013367	Iglon5	40.0653	11.3542	68.7763	6.05732	2.59868	6.61671e-05	0.00138841
ENSMUSG00000024425	Ndfip1	732.904	208.17	1257.64	6.04141	2.59489	1.72101e-08	1.83896e-06
ENSMUSG00000046470	Sox18	42.0968	11.9603	72.2333	6.03944	2.59442	4.17342e-05	0.000950548
ENSMUSG00000032313	AI118078	70.9883	20.169	121.808	6.03935	2.59439	8.87263e-06	0.000281392
ENSMUSG00000020440	Arf5	422.573	120.385	724.761	6.02037	2.58985	1.34807e-07	9.50561e-06
ENSMUSG00000025161	Slc16a3	13.9346	3.97478	23.8945	6.01153	2.58773	0.00142808	0.0146726
ENSMUSG00000091811	Inafm1	101.983	29.1288	174.837	6.0022	2.58549	7.99094e-06	0.000255177
ENSMUSG00000089715	Cbx6	2428.22	693.942	4162.5	5.99834	2.58456	2.42053e-09	3.86479e-07
ENSMUSG00000060279	Ap2a1	386.987	110.659	663.316	5.99425	2.58358	1.80134e-07	1.21468e-05
ENSMUSG00000038894	Irs2	400.451	114.554	686.349	5.99149	2.58292	8.73742e-08	6.63232e-06
ENSMUSG00000050549	5730508B09Rik	73.0004	21.0411	124.96	5.93884	2.57018	1.28552e-05	0.000380749
ENSMUSG00000039476	Prrx2	8.83054	2.55399	15.1071	5.91509	2.5644	0.0018015	0.0173298
ENSMUSG00000045903	Npas4	62.5896	18.1144	107.065	5.91047	2.56327	2.80684e-05	0.000702519
ENSMUSG00000070000	Fcho1	262.542	76.1122	448.972	5.89882	2.56043	6.41755e-07	3.55164e-05
ENSMUSG00000015981	Stk32c	43.5346	12.6315	74.4377	5.893	2.559	4.17417e-05	0.000950548
ENSMUSG00000006930	Hap1	77.3235	22.4528	132.194	5.88765	2.55769	2.46109e-05	0.000630757
ENSMUSG00000051451	Crebzf	495.241	143.885	846.598	5.88386	2.55676	4.23338e-08	3.60772e-06
ENSMUSG00000030281	Il17rc	8.4328	2.45341	14.4122	5.87434	2.55443	0.00288684	0.0246726
ENSMUSG00000004931	Apba3	109.445	31.8707	187.019	5.86804	2.55288	7.24028e-06	0.000236647
ENSMUSG00000046691	Chtf8	108.004	31.4842	184.523	5.86084	2.55111	1.40538e-05	0.000408412
ENSMUSG00000059325	Hopx	33.9517	9.89815	58.0052	5.86021	2.55095	7.53874e-05	0.00153049
ENSMUSG00000074817	Papolb	13.6215	3.97793	23.265	5.84853	2.54807	0.00075465	0.00926827
ENSMUSG00000028799	Zfp362	195.398	57.136	333.661	5.83976	2.54591	1.92221e-06	8.81235e-05
ENSMUSG00000055125	M5C1000I18Rik	20.8571	6.12392	35.5904	5.8117	2.53896	0.000559816	0.00729494
ENSMUSG00000037362	Nov	999.17	293.635	1704.7	5.80552	2.53743	5.48771e-09	7.61667e-07
ENSMUSG00000050796	B3galt6	195.773	57.5428	334.003	5.80443	2.53715	2.72282e-06	0.000113582
ENSMUSG00000041351	Rap1gap	397.511	117.015	678.007	5.79419	2.53461	1.95077e-07	1.30699e-05
ENSMUSG00000046658	Zfp316	215.136	63.3945	366.877	5.7872	2.53286	1.05609e-06	5.51508e-05
ENSMUSG00000023391	Dlx2	29.9765	8.86299	51.0901	5.76443	2.52718	0.000168645	0.00282588
ENSMUSG00000062115	Rai1	641.027	189.957	1092.1	5.74919	2.52336	2.42624e-08	2.42466e-06
ENSMUSG00000028039	Efna3	92.8105	27.5255	158.096	5.74361	2.52196	2.4431e-05	0.000628466
ENSMUSG00000059995	Atxn7l3	342.725	101.844	583.605	5.73037	2.51863	6.50168e-07	3.58392e-05
ENSMUSG00000049686	Orai1	48.424	14.4007	82.4472	5.72521	2.51733	3.31337e-05	0.000797677
ENSMUSG00000039725	2810408M09Rik	102.01	30.3518	173.668	5.72183	2.51648	9.73783e-06	0.000304658
ENSMUSG00000028889	Yrdc	175.542	52.2916	298.793	5.71397	2.51449	3.03787e-06	0.000123389
ENSMUSG00000032185	Carm1	309.447	92.4382	526.455	5.69522	2.50975	6.01125e-07	3.3944e-05
ENSMUSG00000057177	Gsk3a	219.872	65.685	374.058	5.69472	2.50963	2.59061e-06	0.00010938
ENSMUSG00000035873	Pawr	13.7085	4.09712	23.3199	5.69179	2.50888	0.00182725	0.0175022
ENSMUSG00000032051	Fdx1	54.3962	16.2674	92.5251	5.68778	2.50787	3.00504e-05	0.000744081
ENSMUSG00000021508	Cxcl14	127.073	38.0489	216.096	5.67944	2.50575	7.68568e-06	0.000246969
ENSMUSG00000020866	Cacna1g	245.964	73.7421	418.187	5.67094	2.50359	1.35732e-06	6.75439e-05
ENSMUSG00000038459	Abhd17c	611.945	183.705	1040.19	5.66227	2.50138	4.22627e-08	3.60772e-06
ENSMUSG00000031834	Pik3r2	567.083	170.624	963.543	5.64718	2.49753	1.16154e-07	8.53704e-06
ENSMUSG00000044857	Lemd2	301.328	90.8708	511.785	5.63201	2.49365	5.79097e-07	3.29682e-05
ENSMUSG00000030600	Lrfn1	216.7	65.4629	367.937	5.62055	2.49071	1.2554e-06	6.41168e-05
ENSMUSG00000033730	Egr3	25.9784	7.84959	44.1071	5.61903	2.49032	0.00022167	0.00353558
ENSMUSG00000066278	Vps37b	290.581	87.8473	493.315	5.6156	2.48944	6.93139e-07	3.80569e-05
ENSMUSG00000061451	Tmem151a	1543.71	466.756	2620.67	5.61464	2.48919	7.18294e-09	9.27237e-07
ENSMUSG00000071151	Gm4799	14.6234	4.42315	24.8236	5.61221	2.48857	0.00125865	0.0133059
ENSMUSG00000051243	Islr2	47.472	14.3648	80.5792	5.60948	2.48787	6.73251e-05	0.00140634
ENSMUSG00000068615	Gjd2	158.045	47.8858	268.205	5.60092	2.48566	3.97761e-06	0.000151232
ENSMUSG00000046546	Fam43a	48.3052	14.6423	81.9682	5.59806	2.48493	8.10119e-05	0.00161919
ENSMUSG00000031953	Tmem170	13.8454	4.1977	23.4932	5.59669	2.48457	0.00155176	0.0155861
ENSMUSG00000070803	Cited4	8.55871	2.59751	14.5199	5.58994	2.48283	0.00285512	0.0244365
ENSMUSG00000048281	Dleu7	98.1868	29.8193	166.554	5.58545	2.48167	1.43695e-05	0.000413413
ENSMUSG00000047264	Zfp358	185.959	56.506	315.412	5.58192	2.48076	3.1213e-06	0.000126041
ENSMUSG00000040811	Eml2	241.771	73.7695	409.773	5.55478	2.47373	1.52397e-06	7.40189e-05
ENSMUSG00000035863	Palm	689.677	210.662	1168.69	5.54769	2.47189	8.82913e-08	6.66551e-06
ENSMUSG00000044134	Fam109a	91.3781	27.9253	154.831	5.54448	2.47105	2.31618e-05	0.00060364
ENSMUSG00000070705	Eid2b	149.142	45.591	252.692	5.54259	2.47056	9.01989e-06	0.000285411
ENSMUSG00000058301	Upf1	323.935	99.1855	548.684	5.5319	2.46778	6.29591e-07	3.52597e-05
ENSMUSG00000003135	Cnot11	217.593	66.6384	368.548	5.53056	2.46743	1.85274e-06	8.5788e-05
ENSMUSG00000025880	Smad7	117.796	36.0996	199.493	5.52618	2.46628	7.0758e-06	0.000232555
ENSMUSG00000037553	Zdhhc18	166.494	51.1127	281.875	5.51478	2.4633	4.78482e-06	0.000172953
ENSMUSG00000019254	Ppp1r12c	433.611	133.501	733.721	5.49601	2.45838	2.54909e-07	1.63177e-05
ENSMUSG00000021102	Glrx5	189.458	58.407	320.509	5.4875	2.45615	4.22699e-06	0.000158695
ENSMUSG00000037326	Capn15	148.966	45.9892	251.943	5.47831	2.45373	6.22777e-06	0.000208458
ENSMUSG00000024190	Dusp1	410.818	127.027	694.609	5.4682	2.45107	4.0407e-07	2.3735e-05
ENSMUSG00000024777	Ppp2r5b	503.878	155.895	851.862	5.46433	2.45004	3.34872e-07	2.04921e-05
ENSMUSG00000024570	Rbfa	126.879	39.2909	214.467	5.45845	2.44849	1.05705e-05	0.000328491
ENSMUSG00000026426	Arl8a	823.068	254.996	1391.14	5.45554	2.44772	4.60969e-08	3.83433e-06
ENSMUSG00000081984	Dnajb3	9.43247	2.92354	15.9414	5.45277	2.44699	0.00228891	0.0206866
ENSMUSG00000020132	Rab21	338.271	105.053	571.489	5.43999	2.4436	9.03907e-07	4.77421e-05
ENSMUSG00000024063	Lbh	136.153	42.2964	230.009	5.43802	2.44308	9.82375e-06	0.000306656
ENSMUSG00000024330	Col11a2	16.5831	5.16758	27.9986	5.41813	2.4378	0.00121717	0.013026
ENSMUSG00000040128	Pnrc1	344.359	107.346	581.373	5.4159	2.4372	6.00981e-07	3.3944e-05
ENSMUSG00000035773	Kiss1r	10.6613	3.32586	17.9967	5.41114	2.43593	0.000937614	0.0108356
ENSMUSG00000045009	Prrt3	190.304	59.6042	321.004	5.38559	2.42911	3.64116e-06	0.000141283
ENSMUSG00000017724	Etv4	32.8387	10.2869	55.3904	5.38454	2.42882	0.000129954	0.00232929
ENSMUSG00000031609	Sap30	39.6207	12.4253	66.8161	5.37741	2.42691	9.02865e-05	0.00174676
ENSMUSG00000062785	Kcnc3	95.4934	29.9763	161.01	5.37125	2.42526	3.76324e-05	0.000884695
ENSMUSG00000030409	Dmpk	32.6542	10.2595	55.0489	5.36566	2.42376	0.000277834	0.00419608
ENSMUSG00000028444	Cntfr	32.8962	10.3683	55.4241	5.34554	2.41834	0.000176665	0.00294604
ENSMUSG00000067071	Hes6	71.8656	22.6546	121.077	5.34447	2.41805	3.99196e-05	0.000921135
ENSMUSG00000039477	Tnrc18	108.382	34.2727	182.491	5.32466	2.41269	2.06608e-05	0.000551921
ENSMUSG00000003863	Ppfia3	347.979	110.203	585.755	5.31522	2.41013	2.31267e-06	0.000101023
ENSMUSG00000033323	Ctdp1	199.739	63.2851	336.194	5.31236	2.40935	4.88796e-06	0.000174099
ENSMUSG00000074738	B930041F14Rik	89.0618	28.2674	149.856	5.30139	2.40637	3.78431e-05	0.000886473
ENSMUSG00000074358	Ccdc61	33.3175	10.5855	56.0494	5.29492	2.40461	0.00020779	0.00336411
ENSMUSG00000047669	Msl3l2	110.217	35.0392	185.395	5.29106	2.40356	1.93704e-05	0.000521463
ENSMUSG00000019261	Map1s	282.169	89.8788	474.46	5.27889	2.40023	1.99142e-06	9.02846e-05
ENSMUSG00000049401	Ogfr	344.433	109.77	579.096	5.27556	2.39933	2.23434e-06	9.87294e-05
ENSMUSG00000027646	Src	262.426	83.7877	441.064	5.26407	2.39618	2.1219e-06	9.47758e-05
ENSMUSG00000034928	Rnf44	542.957	173.801	912.114	5.24805	2.39178	2.17938e-07	1.43478e-05
ENSMUSG00000029478	Ncor2	204.056	65.3246	342.788	5.24746	2.39162	7.08162e-06	0.000232555
ENSMUSG00000033717	Adra2a	321.715	103.147	540.282	5.23796	2.389	2.42271e-06	0.000104515
ENSMUSG00000025171	Ubtd1	43.415	13.9306	72.8994	5.23304	2.38765	9.28308e-05	0.00178356
ENSMUSG00000029346	Srrd	122.765	39.3968	206.133	5.23223	2.38743	1.8729e-05	0.000508286
ENSMUSG00000036615	Rfxap	300.517	96.6057	504.427	5.22151	2.38447	2.26821e-06	9.97078e-05
ENSMUSG00000028538	St3gal3	103.532	33.3757	173.689	5.20406	2.37964	3.17093e-05	0.000776755
ENSMUSG00000035545	Leng8	671.329	217.173	1125.48	5.18242	2.37363	1.58103e-07	1.07657e-05
ENSMUSG00000021464	Ror2	11.7664	3.8146	19.7181	5.16912	2.36992	0.00264475	0.0231058
ENSMUSG00000029060	Mib2	381.09	123.619	638.561	5.16554	2.36892	1.54686e-06	7.48692e-05
ENSMUSG00000050473	Slc35d3	11.7409	3.81207	19.6697	5.15985	2.36733	0.00193253	0.0182557
ENSMUSG00000047632	Fgfbp3	30.3709	9.86284	50.879	5.15865	2.36699	0.000432811	0.00597632
ENSMUSG00000038025	Phf2	145.931	47.4075	244.455	5.15646	2.36638	1.22207e-05	0.000368442
ENSMUSG00000090213	Tmem189	331.887	107.844	555.931	5.15498	2.36597	1.60095e-06	7.61147e-05
ENSMUSG00000020802	Ube2o	622.109	202.435	1041.78	5.14627	2.36353	2.66976e-07	1.70117e-05
ENSMUSG00000069565	Dazap1	175.356	57.0865	293.625	5.14351	2.36275	5.5388e-06	0.000192831
ENSMUSG00000074922	Fam122a	84.7301	27.6954	141.765	5.11872	2.35578	3.212e-05	0.000780033
ENSMUSG00000037979	Ccdc92	238.681	78.1021	399.26	5.11202	2.35389	6.73585e-06	0.000223846
ENSMUSG00000040007	Bahd1	167.996	55.0011	280.991	5.10884	2.353	1.10273e-05	0.000339644
ENSMUSG00000038884	A230050P20Rik	176.927	58.0687	295.785	5.09371	2.34872	9.16337e-06	0.000289292
ENSMUSG00000029603	Dtx1	332.97	109.615	556.325	5.07525	2.34348	1.95951e-06	8.9538e-05
ENSMUSG00000063659	Zbtb18	3087.63	1016.46	5158.8	5.07525	2.34348	3.91972e-08	3.46808e-06
ENSMUSG00000037126	Psd	662.507	218.248	1106.77	5.07114	2.34231	3.79683e-07	2.27335e-05
ENSMUSG00000008855	Hdac5	485.051	159.86	810.242	5.06845	2.34154	7.37816e-07	3.97248e-05
ENSMUSG00000028917	Plekhm2	300.73	99.1899	502.269	5.06371	2.3402	3.0312e-06	0.000123389
ENSMUSG00000063146	Clip2	211.276	69.7714	352.78	5.05622	2.33806	1.34355e-05	0.00039481
ENSMUSG00000017831	Rab5a	607.135	200.909	1013.36	5.04389	2.33454	3.73587e-07	2.26616e-05
ENSMUSG00000047371	Zfp768	41.596	13.7755	69.4165	5.03913	2.33318	0.000203706	0.00331345
ENSMUSG00000075012	Fjx1	407.732	135.062	680.402	5.03769	2.33276	1.31632e-06	6.64908e-05
ENSMUSG00000031788	Kifc3	156.463	51.8893	261.037	5.03065	2.33075	1.86627e-05	0.000508286
ENSMUSG00000037904	Ankrd9	47.7898	15.8511	79.7284	5.02982	2.33051	0.000153499	0.00263268
ENSMUSG00000029030	Tprgl	663.722	220.667	1106.78	5.01561	2.32642	3.77466e-07	2.26986e-05
ENSMUSG00000032462	Pik3cb	317.611	105.612	529.61	5.01469	2.32616	2.94117e-06	0.000120875
ENSMUSG00000028982	Slc25a33	302.202	100.493	503.912	5.01441	2.32608	2.36457e-06	0.000102332
ENSMUSG00000043448	Gjc2	19.4986	6.49093	32.5063	5.00796	2.32422	0.00127797	0.0134487
ENSMUSG00000067594	Krt77	19.8366	6.61327	33.0599	4.99902	2.32164	0.000846833	0.0100627
ENSMUSG00000004263	Atn1	215.582	71.8956	359.268	4.99708	2.32108	1.56825e-05	0.000441876
ENSMUSG00000047044	D030056L22Rik	251.584	83.9189	419.25	4.99589	2.32074	4.71426e-06	0.000171429
ENSMUSG00000020484	Xbp1	1118.79	373.456	1864.13	4.99157	2.31949	5.83197e-08	4.65585e-06
ENSMUSG00000043460	Elfn2	340.47	113.795	567.145	4.98392	2.31728	2.20274e-06	9.80715e-05
ENSMUSG00000039656	Rxrb	319.813	106.905	532.721	4.98312	2.31705	3.61652e-06	0.00014072
ENSMUSG00000056708	Ier5	109.673	36.6741	182.673	4.98097	2.31643	4.15412e-05	0.000950548
ENSMUSG00000035504	Reep6	13.9733	4.6839	23.2627	4.96653	2.31224	0.00305908	0.0256449
ENSMUSG00000028850	Gpatch3	37.1505	12.4553	61.8456	4.96541	2.31191	0.000180501	0.00299206
ENSMUSG00000000325	Arvcf	197.805	66.3216	329.289	4.96504	2.3118	1.49445e-05	0.000427147
ENSMUSG00000040699	Limd2	174.203	58.5082	289.897	4.95481	2.30883	1.81466e-05	0.000499157
ENSMUSG00000027223	Mapk8ip1	586.071	196.861	975.281	4.95416	2.30864	3.75839e-07	2.26986e-05
ENSMUSG00000007570	Fance	95.9477	32.3112	159.584	4.93898	2.30421	4.88198e-05	0.00108792
ENSMUSG00000068267	Cenpb	393.248	133.005	653.491	4.91329	2.29669	3.00407e-06	0.000123096
ENSMUSG00000050541	Adra1b	24.1538	8.16994	40.1377	4.91285	2.29656	0.000828661	0.00992322
ENSMUSG00000037499	Nenf	67.928	22.9794	112.877	4.91209	2.29634	0.000211085	0.00339766
ENSMUSG00000010054	Tusc2	497.18	168.389	825.971	4.90513	2.29429	1.33031e-06	6.67122e-05
ENSMUSG00000053329	D10Jhu81e	109.223	36.9951	181.45	4.9047	2.29417	3.76398e-05	0.000884695
ENSMUSG00000017132	Cyth1	651.57	221.141	1082	4.89279	2.29066	2.50732e-07	1.61996e-05
ENSMUSG00000074238	Ap1ar	562.227	190.879	933.575	4.89093	2.29011	4.73826e-07	2.75394e-05
ENSMUSG00000024736	Tmem132a	159.7	54.2598	265.139	4.88647	2.28879	3.77202e-05	0.000885086
ENSMUSG00000036256	Igfbp7	62.6848	21.3574	104.012	4.87008	2.28394	0.000200286	0.0032693
ENSMUSG00000047604	Frat2	51.2289	17.5248	84.9331	4.84644	2.27693	0.000204365	0.00332027
ENSMUSG00000042686	Jph1	271.64	93.0401	450.241	4.83921	2.27477	5.53601e-06	0.000192831
ENSMUSG00000027612	Mmp24	491.158	168.397	813.919	4.83333	2.27302	2.02643e-06	9.08035e-05
ENSMUSG00000073565	Prr16	113.554	38.9509	188.157	4.83061	2.2722	7.7477e-05	0.00155976
ENSMUSG00000038888	Ctu1	103.193	35.416	170.969	4.82745	2.27126	7.54725e-05	0.00153049
ENSMUSG00000023990	Tfeb	22.913	7.8682	37.9579	4.82421	2.27029	0.00152261	0.0153487
ENSMUSG00000042988	Notum	12.0827	4.15986	20.0055	4.80919	2.26579	0.00277825	0.0240004
ENSMUSG00000030966	Trim21	21.1682	7.31419	35.0222	4.78826	2.2595	0.00145038	0.014825
ENSMUSG00000051236	Msrb3	102.581	35.5245	169.638	4.77525	2.25558	8.8857e-05	0.00173115
ENSMUSG00000032737	Inppl1	45.7355	15.8401	75.631	4.77464	2.25539	0.000409636	0.00573463
ENSMUSG00000059991	Nptx2	91.0132	31.5393	150.487	4.77142	2.25442	9.26293e-05	0.00178215
ENSMUSG00000074211	Sdhaf1	23.3382	8.09112	38.5853	4.76884	2.25364	0.00122043	0.01305
ENSMUSG00000060950	Trmt61a	104.341	36.1939	172.489	4.7657	2.25269	4.30425e-05	0.000973906
ENSMUSG00000034839	Larp6	214.971	74.7403	355.201	4.75247	2.24868	1.24335e-05	0.00037063
ENSMUSG00000023972	Ptk7	72.5345	25.2278	119.841	4.75036	2.24804	0.000112746	0.00206618
ENSMUSG00000024212	Mllt1	482.008	167.656	796.36	4.74996	2.24792	2.51085e-06	0.000106491
ENSMUSG00000008140	Emc10	426.454	148.477	704.432	4.74438	2.24622	2.89913e-06	0.000119501
ENSMUSG00000020950	Foxg1	609.032	212.535	1005.53	4.73112	2.24218	6.39472e-07	3.55164e-05
ENSMUSG00000071477	Zfp777	158.736	55.4381	262.034	4.72661	2.24081	3.05082e-05	0.0007514
ENSMUSG00000044641	Pard6b	52.6961	18.4543	86.9378	4.71097	2.23602	0.000212807	0.00342141
ENSMUSG00000025477	Inpp5a	258.124	90.7567	425.492	4.68827	2.22906	1.22804e-05	0.000369186
ENSMUSG00000035355	Kcnh4	46.3738	16.3156	76.4319	4.6846	2.22792	0.000435292	0.0060046
ENSMUSG00000072949	Acot1	47.3612	16.7369	77.9855	4.6595	2.22018	0.00030555	0.00453383
ENSMUSG00000057706	Mex3b	261.705	92.5548	430.856	4.65514	2.21883	7.74785e-06	0.000247985
ENSMUSG00000051390	Zbtb22	100.166	35.4564	164.876	4.65009	2.21726	0.000157453	0.00269026
ENSMUSG00000018765	Fxr2	322.291	114.196	530.387	4.64453	2.21553	4.43143e-06	0.000164591
ENSMUSG00000040690	Col16a1	15.6865	5.55889	25.8141	4.64376	2.21529	0.00263552	0.0230396
ENSMUSG00000038402	Foxf2	27.8488	9.87386	45.8238	4.64092	2.21441	0.000578306	0.0074937
ENSMUSG00000029234	Tmem165	391.155	138.793	643.517	4.63654	2.21305	3.48865e-06	0.000137283
ENSMUSG00000032120	C2cd2l	513.602	182.666	844.538	4.6234	2.20896	3.18871e-06	0.000127481
ENSMUSG00000028871	Rspo1	28.1411	10.0148	46.2674	4.6199	2.20786	0.000844218	0.0100403
ENSMUSG00000052957	Gas1	125.123	44.5877	205.658	4.61243	2.20553	3.41526e-05	0.000815144
ENSMUSG00000021731	Mrps30	128.526	45.8524	211.2	4.60609	2.20354	7.15558e-05	0.00147039
ENSMUSG00000030678	Maz	180.038	64.2586	295.818	4.60356	2.20275	4.81826e-05	0.00107778
ENSMUSG00000070509	Rgma	138.731	49.5683	227.893	4.59756	2.20087	7.86783e-05	0.00157936
ENSMUSG00000071256	Zfp213	44.846	16.0252	73.6668	4.59693	2.20067	0.000436567	0.00601623
ENSMUSG00000041375	Ccdc9	72.1271	25.7922	118.462	4.59294	2.19942	0.000249503	0.00386814
ENSMUSG00000034771	Tle2	35.3265	12.6366	58.0163	4.59113	2.19885	0.000875099	0.0102661
ENSMUSG00000074886	Grk6	266.179	95.2625	437.096	4.58833	2.19797	1.56664e-05	0.000441876
ENSMUSG00000029376	Mthfd2l	50.0911	17.9271	82.2551	4.5883	2.19796	0.000341976	0.00496903
ENSMUSG00000040105	Ppapdc2	326.942	117.219	536.666	4.57832	2.19482	6.96067e-06	0.000229669
ENSMUSG00000049091	Sephs2	205.627	73.7319	337.523	4.5777	2.19462	2.98629e-05	0.000740761
ENSMUSG00000031530	Dusp4	18.5215	6.65111	30.392	4.56946	2.19202	0.00358802	0.0288604
ENSMUSG00000038055	Dexi	133.648	48.1315	219.164	4.55344	2.18696	8.60161e-05	0.00169067
ENSMUSG00000049999	Ppp1r3d	91.2483	32.8841	149.612	4.54969	2.18577	0.000158478	0.00269595
ENSMUSG00000013419	Zfp651	551.802	199.04	904.565	4.54465	2.18417	1.92095e-06	8.81235e-05
ENSMUSG00000046574	Prr12	122.139	44.1273	200.151	4.53576	2.18134	7.12173e-05	0.00146777
ENSMUSG00000021973	Micu2	299.154	108.138	490.171	4.53284	2.18042	1.18898e-05	0.000360613
ENSMUSG00000024393	Prrc2a	219.189	79.282	359.096	4.52935	2.1793	2.94608e-05	0.000732093
ENSMUSG00000027329	Spef1	72.2891	26.1917	118.386	4.52	2.17632	0.0003424	0.00496999
ENSMUSG00000047417	Rexo1	388.649	140.82	636.478	4.5198	2.17626	6.17043e-06	0.000207037
ENSMUSG00000038034	Igsf8	491.913	178.245	805.581	4.51951	2.17617	3.14344e-06	0.000126567
ENSMUSG00000022211	Lrrc16b	42.9942	15.5794	70.4091	4.51938	2.17612	0.000502807	0.00669013
ENSMUSG00000021476	Habp4	814.713	295.512	1333.91	4.51391	2.17438	9.98768e-07	5.23543e-05
ENSMUSG00000051067	Lingo3	139.567	50.7381	228.397	4.50148	2.1704	6.04147e-05	0.00128719
ENSMUSG00000054708	Ankrd24	80.3	29.1922	131.408	4.50148	2.1704	0.000123711	0.00223469
ENSMUSG00000030034	Ino80b	16.7871	6.10784	27.4663	4.49689	2.16893	0.00334866	0.0273464
ENSMUSG00000061130	Ppm1b	739.369	269.113	1209.62	4.49487	2.16828	1.11865e-06	5.79822e-05
ENSMUSG00000033006	Sox10	95.5375	34.8248	156.25	4.48675	2.16567	8.75548e-05	0.00171541
ENSMUSG00000030733	Sh2b1	438.021	159.859	716.183	4.48009	2.16353	6.08687e-06	0.000205225
ENSMUSG00000009075	Cabp7	13.2121	4.828	21.5961	4.4731	2.16128	0.00503371	0.0367051
ENSMUSG00000033287	Kctd17	257.019	93.9527	420.085	4.47124	2.16067	2.58486e-05	0.000657624
ENSMUSG00000020654	Adcy3	211.483	77.316	345.649	4.4706	2.16047	3.02655e-05	0.000748076
ENSMUSG00000006676	Usp19	450.097	164.743	735.451	4.46422	2.15841	7.36837e-06	0.000239705
ENSMUSG00000018446	C1qbp	249.639	91.4286	407.848	4.46084	2.15732	3.23001e-05	0.000783037
ENSMUSG00000039244	E130309D02Rik	125.623	46.092	205.155	4.45098	2.15412	8.45711e-05	0.00167109
ENSMUSG00000038552	Fndc4	373.575	137.076	610.073	4.45062	2.15401	1.17856e-05	0.000358236
ENSMUSG00000031217	Efnb1	46.6837	17.1367	76.2308	4.44841	2.15329	0.000383806	0.00544025
ENSMUSG00000019464	Ptger1	65.8478	24.1816	107.514	4.44611	2.15254	0.000319868	0.00469197
ENSMUSG00000029471	Camkk2	450.981	165.704	736.259	4.44321	2.1516	5.07661e-06	0.00017853
ENSMUSG00000027570	Col9a3	69.534	25.5557	113.512	4.44175	2.15113	0.000301361	0.00448683
ENSMUSG00000015461	Atf6b	209.02	76.8876	341.153	4.43704	2.1496	4.96469e-05	0.00109991
ENSMUSG00000030036	Mogs	250.204	92.0785	408.33	4.43459	2.1488	1.71302e-05	0.000475911
ENSMUSG00000045287	Rtn4rl1	523.886	192.904	854.868	4.43158	2.14782	2.70043e-06	0.000112987
ENSMUSG00000033184	Tmed7	1309.24	482.474	2136.01	4.42721	2.1464	4.01661e-07	2.3735e-05
ENSMUSG00000024790	Sac3d1	150.162	55.3804	244.944	4.42294	2.145	8.47251e-05	0.00167176
ENSMUSG00000049287	Iba57	103.11	38.0277	168.192	4.42288	2.14499	0.000126886	0.00228017
ENSMUSG00000000552	Zfp385a	70.3709	25.9663	114.775	4.42018	2.1441	0.000335846	0.00488507
ENSMUSG00000030739	Myh14	24.7767	9.14297	40.4104	4.41983	2.14399	0.0011409	0.0124593
ENSMUSG00000034226	Rhov	61.618	22.769	100.467	4.41244	2.14158	0.000268096	0.00408346
ENSMUSG00000010154	Spire2	70.9614	26.2815	115.641	4.4001	2.13753	0.000267595	0.00408031
ENSMUSG00000090071	Cdk5r2	72.776	26.9677	118.584	4.39727	2.13661	0.000496208	0.00663838
ENSMUSG00000046711	Hmga1	32.0543	11.884	52.2246	4.39454	2.13571	0.00137593	0.0142955
ENSMUSG00000074916	Chst14	14.9301	5.53713	24.3231	4.39273	2.13512	0.00441636	0.033405
ENSMUSG00000053253	Ndfip2	1610.93	598.02	2623.84	4.38755	2.13342	4.04953e-07	2.3735e-05
ENSMUSG00000034168	Irf2bpl	414.513	153.998	675.028	4.38337	2.13204	5.71507e-06	0.000197975
ENSMUSG00000029033	Acap3	935.144	347.983	1522.31	4.37466	2.12917	1.32511e-06	6.66922e-05
ENSMUSG00000014907	Naf1	68.5689	25.5191	111.619	4.37392	2.12893	0.000189724	0.00312999
ENSMUSG00000020701	Tmem132e	55.7883	20.7801	90.7966	4.36941	2.12744	0.000325248	0.00475581
ENSMUSG00000024072	Yipf4	513.786	191.5	836.071	4.3659	2.12628	2.34163e-06	0.000101968
ENSMUSG00000061517	Sox21	50.8932	18.9841	82.8024	4.36168	2.12488	0.000498315	0.00664946
ENSMUSG00000046160	Olig1	214.695	80.1463	349.244	4.35758	2.12353	6.43951e-05	0.00136085
ENSMUSG00000027932	Slc27a3	23.0132	8.59655	37.4298	4.35405	2.12236	0.00189702	0.018049
ENSMUSG00000024960	Plcb3	26.3	9.84109	42.7589	4.34494	2.11934	0.00132862	0.0138557
ENSMUSG00000027316	Gfra4	224.166	83.9212	364.411	4.3423	2.11846	6.06744e-05	0.0012907
ENSMUSG00000035033	Tbr1	796.478	298.425	1294.53	4.33787	2.11699	1.305e-06	6.63385e-05
ENSMUSG00000038932	Tcfl5	34.5362	12.944	56.1284	4.33624	2.11644	0.00108439	0.0120025
ENSMUSG00000044477	Zfand3	261.103	97.8644	424.341	4.33601	2.11637	2.48111e-05	0.000634717
ENSMUSG00000050930	Map10	79.9138	29.9776	129.85	4.33157	2.11489	0.000228178	0.00360594
ENSMUSG00000000126	Wnt9a	144.636	54.2724	234.999	4.33	2.11437	9.01966e-05	0.00174676
ENSMUSG00000021550	2210016F16Rik	46.6638	17.5576	75.77	4.31551	2.10953	0.000466041	0.00631588
ENSMUSG00000071719	Tmem28	173.203	65.235	281.171	4.31013	2.10773	9.58156e-05	0.00182575
ENSMUSG00000070462	Mesdc1	96.2659	36.3124	156.219	4.30209	2.10504	0.000274276	0.0041503
ENSMUSG00000063129	Aldoart2	7.8472	2.96138	12.733	4.2997	2.10423	0.0153919	0.081327
ENSMUSG00000027999	Pla2g12a	147.257	55.6667	238.847	4.29066	2.1012	0.000103965	0.00193849
ENSMUSG00000038622	Med30	50.9982	19.2852	82.7112	4.28885	2.10059	0.000619635	0.00790679
ENSMUSG00000028919	Arhgef19	18.2839	6.91754	29.6502	4.28623	2.09971	0.00292087	0.024864
ENSMUSG00000021339	Mrs2	55.8504	21.1543	90.5465	4.28028	2.09771	0.000805244	0.00970134
ENSMUSG00000036565	Ttyh3	641.069	242.871	1039.27	4.27909	2.0973	4.5272e-06	0.00016681
ENSMUSG00000028833	Ncdn	1807.12	684.748	2929.49	4.2782	2.09701	1.19341e-06	6.1627e-05
ENSMUSG00000025499	Hras	304.125	115.306	492.945	4.2751	2.09596	3.92112e-05	0.000906295
ENSMUSG00000047842	Diras2	2752.12	1044.18	4460.06	4.27137	2.0947	8.45312e-07	4.49894e-05
ENSMUSG00000046791	2410016O06Rik	110.504	41.9448	179.063	4.26902	2.0939	0.000206551	0.00334797
ENSMUSG00000007670	Khsrp	375.825	142.786	608.865	4.26419	2.09227	1.28266e-05	0.000380714
ENSMUSG00000052253	Zfp622	188.588	71.6663	305.509	4.26294	2.09185	7.83327e-05	0.0015747
ENSMUSG00000023307	March5	605.548	230.61	980.487	4.25172	2.08805	3.18032e-06	0.000127481
ENSMUSG00000034156	Bzrap1	555.277	211.499	899.056	4.25088	2.08776	4.56291e-06	0.000167238
ENSMUSG00000024050	Wiz	264.783	101.024	428.542	4.24199	2.08474	3.2999e-05	0.000795813
ENSMUSG00000049562	Ap5b1	22.521	8.59655	36.4454	4.23954	2.08391	0.00248836	0.0220445
ENSMUSG00000032128	Robo3	63.8045	24.3579	103.251	4.23892	2.0837	0.000455972	0.00622191
ENSMUSG00000039834	Zfp335	87.7793	33.5122	142.046	4.23865	2.0836	0.000258046	0.00396079
ENSMUSG00000042978	Sbk1	720.527	275.449	1165.61	4.23166	2.08122	3.5354e-06	0.00013795
ENSMUSG00000041073	Nacad	321.205	122.829	519.582	4.23011	2.0807	2.24485e-05	0.000591711
ENSMUSG00000063897	DHRSX	30.4618	11.6585	49.2651	4.22568	2.07918	0.00165639	0.0163092
ENSMUSG00000023075	Akirin1	796.366	305.038	1287.69	4.22141	2.07773	2.23884e-06	9.87294e-05
ENSMUSG00000045763	Basp1	1257.51	482.132	2032.88	4.21643	2.07602	1.60547e-06	7.61147e-05
ENSMUSG00000001910	Nacc1	300.529	115.254	485.804	4.21506	2.07555	3.83734e-05	0.000895874
ENSMUSG00000053046	Brsk2	872.748	335.112	1410.38	4.20869	2.07337	2.00706e-06	9.02988e-05
ENSMUSG00000026955	Sapcd2	25.1884	9.67523	40.7016	4.20678	2.07272	0.00202246	0.0188298
ENSMUSG00000020811	Wscd1	652.855	250.978	1054.73	4.20249	2.07124	3.9247e-06	0.000149775
ENSMUSG00000032867	Fbxw8	260.886	100.591	421.18	4.18704	2.06593	4.90074e-05	0.00108792
ENSMUSG00000048022	Tmem229a	524.645	202.336	846.955	4.18589	2.06553	4.2811e-06	0.000160293
ENSMUSG00000041870	Ankrd13a	265.435	102.41	428.461	4.18377	2.0648	3.86138e-05	0.000898963
ENSMUSG00000046034	Otulin	143.778	55.5008	232.055	4.18111	2.06389	0.000126385	0.00227707
ENSMUSG00000033467	Crlf2	8.95537	3.46681	14.4439	4.16634	2.05878	0.0119194	0.0679129
ENSMUSG00000029599	Ddx54	219.377	85.1569	353.597	4.15231	2.05391	0.00011267	0.00206618
ENSMUSG00000098176	Ccdc166	76.8898	29.8489	123.931	4.15193	2.05378	0.000520512	0.00687304
ENSMUSG00000031916	Cog8	208.736	81.0414	336.43	4.15134	2.05358	6.57077e-05	0.00138086
ENSMUSG00000020376	Rnf130	203.568	79.1224	328.014	4.14564	2.0516	8.48663e-05	0.00167217
ENSMUSG00000057691	Zfp746	374.912	145.773	604.051	4.14377	2.05094	1.42131e-05	0.000411524
ENSMUSG00000099913	Gm28551	20.0761	7.80607	32.346	4.1437	2.05092	0.00384072	0.0302274
ENSMUSG00000054863	Fam19a5	394.348	153.4	635.295	4.14142	2.05012	1.51668e-05	0.000432346
ENSMUSG00000041117	Ccdc8	22.1498	8.62714	35.6724	4.13491	2.04785	0.00140281	0.0144989
ENSMUSG00000028949	Smarcd3	69.0623	26.933	111.192	4.12845	2.0456	0.00073287	0.00908144
ENSMUSG00000014470	Rnf166	151.612	59.1303	244.093	4.12806	2.04546	0.000162295	0.00273597
ENSMUSG00000038517	Tbkbp1	68.6724	26.798	110.547	4.12519	2.04446	0.000427652	0.00591685
ENSMUSG00000017221	Psmd3	544.293	212.405	876.182	4.12506	2.04442	1.12119e-05	0.000343808
ENSMUSG00000044352	Sowaha	463.429	180.879	745.979	4.12419	2.04411	1.39241e-05	0.000405493
ENSMUSG00000021326	Trim27	288.075	112.442	463.709	4.12398	2.04404	3.37448e-05	0.000808188
ENSMUSG00000043059	Zfp513	125.028	48.8081	201.249	4.12327	2.04379	0.000222072	0.00353761
ENSMUSG00000037253	Mex3c	557.979	217.846	898.112	4.12269	2.04359	6.16783e-06	0.000207037
ENSMUSG00000029544	Cabp1	88.6206	34.6044	142.637	4.12192	2.04332	0.000227788	0.00360387
ENSMUSG00000025158	Rfng	425.086	166.239	683.934	4.11416	2.0406	2.13985e-05	0.000569438
ENSMUSG00000040009	Gnaz	975.869	381.675	1570.06	4.11362	2.04041	1.56019e-06	7.51854e-05
ENSMUSG00000054450	Gm9945	7.41158	2.89925	11.9239	4.11276	2.04011	0.0079821	0.0513568
ENSMUSG00000068551	Zfp467	36.5073	14.2945	58.72	4.10788	2.0384	0.00120404	0.0129334
ENSMUSG00000051378	Kif18b	23.8645	9.34667	38.3824	4.10653	2.03792	0.00210124	0.0193685
ENSMUSG00000023353	Agap3	394.151	154.4	633.902	4.10558	2.03759	3.36281e-05	0.000807867
ENSMUSG00000017740	Slc12a5	973.932	382.132	1565.73	4.09735	2.03469	2.47483e-06	0.000105454
ENSMUSG00000039830	Olig2	101.077	39.6906	162.464	4.09326	2.03325	0.000219683	0.00351974
ENSMUSG00000029390	Tmed2	186.895	73.4604	300.329	4.08831	2.0315	9.57908e-05	0.00182575
ENSMUSG00000059326	Csf2ra	87.4647	34.3866	140.543	4.08714	2.03109	0.000322119	0.00471522
ENSMUSG00000040734	Ppp1r13l	8.66576	3.40722	13.9243	4.08671	2.03094	0.00941856	0.057797
ENSMUSG00000002981	Clptm1	722.435	284.121	1160.75	4.08541	2.03048	4.83076e-06	0.000172964
ENSMUSG00000078202	Nrarp	213.017	83.8697	342.164	4.07971	2.02847	8.22129e-05	0.00163598
ENSMUSG00000021986	Amer2	602.937	237.706	968.169	4.07298	2.02608	4.61075e-06	0.000168547
ENSMUSG00000035456	Prdm8	218.558	86.2128	350.904	4.07021	2.0251	6.17115e-05	0.00130875
ENSMUSG00000081683	Fzd10	20.7619	8.1917	33.3321	4.06901	2.02468	0.00413484	0.0318564
ENSMUSG00000044576	Gareml	86.0437	33.9684	138.119	4.0661	2.02365	0.000376097	0.00536934
ENSMUSG00000004929	Thop1	229.504	90.6278	368.38	4.06476	2.02317	9.976e-05	0.00187519
ENSMUSG00000040016	Ptger3	59.1004	23.3394	94.8615	4.06444	2.02305	0.000788545	0.00956653
ENSMUSG00000048755	Mcat	252.008	99.5317	404.484	4.06387	2.02285	5.05796e-05	0.00111701
ENSMUSG00000024220	Zfp523	384.692	152.028	617.356	4.0608	2.02176	2.87248e-05	0.000716223
ENSMUSG00000069755	Zfp125	24.8105	9.8168	39.8042	4.0547	2.0196	0.00210445	0.0193852
ENSMUSG00000027099	Mtx2	396.169	156.857	635.48	4.05134	2.0184	1.38353e-05	0.000403753
ENSMUSG00000053693	Mast1	388.908	154.011	623.804	4.05038	2.01806	2.60091e-05	0.000659292
ENSMUSG00000002111	Spi1	26.1986	10.3875	42.0096	4.04425	2.01587	0.0025308	0.0223067
ENSMUSG00000034472	Rasd2	217.567	86.2718	348.863	4.04376	2.0157	0.000118184	0.00215445
ENSMUSG00000047428	Dlk2	122.058	48.496	195.621	4.03376	2.01213	0.000239386	0.00374472
ENSMUSG00000020814	Mxra7	22.948	9.12121	36.7748	4.03179	2.01142	0.00199655	0.0186762
ENSMUSG00000005575	Ube2m	225.457	89.6213	361.292	4.03132	2.01125	0.000108748	0.00201416
ENSMUSG00000027198	Ext2	423.193	168.688	677.698	4.01748	2.00629	1.85661e-05	0.000506684
ENSMUSG00000020435	Osbp2	606.939	241.99	971.889	4.01624	2.00585	7.49736e-06	0.000242764
ENSMUSG00000030410	Dmwd	634.292	252.929	1015.66	4.01558	2.00561	1.28075e-05	0.000380714
ENSMUSG00000039059	Hrh3	55.3415	22.0703	88.6128	4.01502	2.00541	0.000827593	0.00991898
ENSMUSG00000038697	Taf5l	268.058	106.945	429.171	4.01299	2.00468	5.7327e-05	0.00123271
ENSMUSG00000036840	Siah1a	401.52	160.646	642.395	3.99884	1.99958	1.60517e-05	0.000449544
ENSMUSG00000048429	1810026J23Rik	854.776	342.117	1367.43	3.99698	1.99891	3.52298e-06	0.000137853
ENSMUSG00000078137	Ankrd63	22.0679	8.84376	35.2921	3.99062	1.99661	0.00319207	0.0263778
ENSMUSG00000029713	Gnb2	515.062	206.594	823.53	3.98621	1.99502	3.71231e-05	0.000877001
ENSMUSG00000031833	Mast3	566.662	227.373	905.95	3.98442	1.99437	1.23723e-05	0.000370344
ENSMUSG00000031671	Setd6	60.5309	24.2951	96.7666	3.98296	1.99384	0.00113621	0.0124179
ENSMUSG00000042570	Mier2	339.809	136.493	543.126	3.97914	1.99246	3.90673e-05	0.000904473
ENSMUSG00000032002	Dcun1d5	319.638	128.393	510.883	3.97907	1.99243	4.90271e-05	0.00108792
ENSMUSG00000030685	Kctd13	342.773	138.202	547.343	3.96047	1.98567	6.12979e-05	0.00130197
ENSMUSG00000033955	Tnks1bp1	168.929	68.1349	269.723	3.95867	1.98501	0.000161245	0.00272157
ENSMUSG00000035711	Dok3	19.4577	7.84959	31.0658	3.95763	1.98464	0.0042654	0.0325391
ENSMUSG00000023938	Aars2	111.576	45.0582	178.094	3.95255	1.98278	0.000501144	0.0066744
ENSMUSG00000005973	Rcn1	247.926	100.281	395.572	3.94465	1.9799	0.000119292	0.00216432
ENSMUSG00000044006	Cilp2	19.2384	7.78938	30.6874	3.93964	1.97807	0.00666542	0.0452317
ENSMUSG00000031955	Bcar1	212.088	85.8722	338.303	3.93961	1.97805	0.000111987	0.00205769
ENSMUSG00000049230	Gm9833	53.3005	21.6251	84.976	3.92951	1.97435	0.00100134	0.011364
ENSMUSG00000048661	Lemd3	696.492	282.69	1110.29	3.9276	1.97365	5.98949e-06	0.000202927
ENSMUSG00000040857	Erf	26.5735	10.7867	42.3603	3.92709	1.97346	0.00303045	0.0254818
ENSMUSG00000035202	Lars2	8945.16	3632.13	14258.2	3.92557	1.9729	8.73303e-05	0.00171343
ENSMUSG00000047368	Abhd17b	755.146	306.778	1203.51	3.92307	1.97198	4.10399e-06	0.000154914
ENSMUSG00000031661	Nkd1	66.1532	26.8926	105.414	3.91981	1.97078	0.00105496	0.0117517
ENSMUSG00000044548	Dact1	113.718	46.2449	181.191	3.91806	1.97014	0.000233072	0.00367492
ENSMUSG00000069920	B3gnt9	13.8632	5.64024	22.0861	3.91581	1.96931	0.0106217	0.063054
ENSMUSG00000042066	Tmcc2	299.002	121.678	476.326	3.91465	1.96888	0.000121128	0.00219374
ENSMUSG00000050295	Foxc1	53.34	21.7096	84.9703	3.91395	1.96863	0.000615145	0.0078683
ENSMUSG00000031776	Arl2bp	820.599	334.077	1307.12	3.91264	1.96814	5.77987e-06	0.000199103
ENSMUSG00000074252	Gm10654	18.8684	7.68688	30.05	3.90926	1.96689	0.00415264	0.0319227
ENSMUSG00000029406	Pitpnm2	570.177	232.425	907.93	3.90633	1.96582	2.07624e-05	0.000553571
ENSMUSG00000073422	H2-Ke6	9.21145	3.75501	14.6679	3.90622	1.96577	0.012868	0.0716432
ENSMUSG00000046668	Cxxc5	207.515	84.6737	330.356	3.90152	1.96404	0.000118662	0.00216034
ENSMUSG00000026825	Dnm1	1036.64	423.045	1650.23	3.90084	1.96378	4.86186e-06	0.000173615
ENSMUSG00000024952	Rps6ka4	111.27	45.4173	177.123	3.89991	1.96344	0.000425741	0.00589628
ENSMUSG00000020776	Fbf1	315.977	128.989	502.965	3.89928	1.96321	8.22704e-05	0.00163598
ENSMUSG00000020621	Rdh14	330.494	135.045	525.944	3.8946	1.96148	5.50924e-05	0.00119576
ENSMUSG00000031872	Bean1	327.322	134.142	520.502	3.88021	1.95614	5.09984e-05	0.00112447
ENSMUSG00000024429	Gnl1	380.797	156.228	605.366	3.87489	1.95416	8.43163e-05	0.00166843
ENSMUSG00000046822	Slc39a3	761.398	312.763	1210.03	3.86885	1.9519	1.15139e-05	0.000351516
ENSMUSG00000024201	Kdm4b	636.796	261.64	1011.95	3.86772	1.95148	1.87672e-05	0.000508286
ENSMUSG00000021400	Wrnip1	496.691	204.165	789.217	3.86559	1.95069	2.27964e-05	0.00059748
ENSMUSG00000028631	Kcnq4	72.9718	29.9956	115.948	3.86551	1.95066	0.000969182	0.0111191
ENSMUSG00000021143	Pacs2	347.38	142.805	551.956	3.86512	1.95051	7.36335e-05	0.00150418
ENSMUSG00000009035	Tmem184b	482.511	198.379	766.644	3.86454	1.9503	2.87706e-05	0.000716223
ENSMUSG00000051185	Fam174a	444.568	182.971	706.165	3.85943	1.94839	2.31198e-05	0.00060364
ENSMUSG00000021892	Sh3bp5	573.778	236.189	911.367	3.85863	1.94809	1.43747e-05	0.000413413
ENSMUSG00000036622	Atp13a2	658.99	271.43	1046.55	3.85568	1.94699	3.17918e-05	0.000776755
ENSMUSG00000039275	Foxk2	990.034	407.807	1572.26	3.85541	1.94688	6.66141e-06	0.000222437
ENSMUSG00000061024	Rrs1	132.381	54.5546	210.207	3.85315	1.94604	0.000376087	0.00536934
ENSMUSG00000018974	Sart3	212.29	87.6149	336.966	3.84599	1.94335	0.000187611	0.0031025
ENSMUSG00000042203	Tbc1d22b	274.652	113.443	435.861	3.84212	1.9419	0.000128455	0.00230539
ENSMUSG00000046240	Hepacam	278.469	115.021	441.916	3.84204	1.94187	7.38978e-05	0.00150736
ENSMUSG00000022175	Lrp10	169.067	69.8808	268.253	3.83872	1.94063	0.000314411	0.00462167
ENSMUSG00000002997	Prkar2b	1851.71	765.646	2937.77	3.83698	1.93997	3.83637e-06	0.00014736
ENSMUSG00000047824	Pygo2	386.742	160.08	613.405	3.83186	1.93805	4.5019e-05	0.00101191
ENSMUSG00000009630	Ppp2cb	745.799	308.813	1182.78	3.8301	1.93738	1.08733e-05	0.000336394
ENSMUSG00000004455	Ppp1cc	130.363	53.9987	206.728	3.82838	1.93674	0.000378116	0.00539004
ENSMUSG00000031823	Zdhhc7	356.788	147.827	565.748	3.82709	1.93625	6.50245e-05	0.00137065
ENSMUSG00000049097	Ankrd34a	359.338	148.927	569.749	3.82569	1.93572	3.87444e-05	0.000898963
ENSMUSG00000038453	Srcin1	761.124	315.945	1206.3	3.81808	1.93285	1.09941e-05	0.000339375
ENSMUSG00000061462	Obscn	12.9467	5.37442	20.519	3.8179	1.93278	0.00865576	0.0543813
ENSMUSG00000026930	Gpsm1	563.737	234.205	893.27	3.81405	1.93132	2.24993e-05	0.000591927
ENSMUSG00000062762	Ei24	547.372	227.513	867.231	3.81179	1.93047	2.2058e-05	0.000584747
ENSMUSG00000052142	Rasal3	38.585	16.063	61.1069	3.80419	1.92759	0.00200751	0.0187282
ENSMUSG00000045039	Megf8	301.695	125.652	477.738	3.80209	1.92679	0.000131887	0.00234577
ENSMUSG00000026259	Ngef	963.638	401.466	1525.81	3.80059	1.92622	1.23053e-05	0.000369186
ENSMUSG00000028557	Rnf11	1711.09	713.006	2709.17	3.79964	1.92586	4.05924e-06	0.000153643
ENSMUSG00000039395	Mreg	15.0866	6.28724	23.886	3.79912	1.92566	0.00782925	0.0507258
ENSMUSG00000003534	Ddr1	112.359	46.8384	177.879	3.79771	1.92513	0.000546623	0.00717689
ENSMUSG00000034118	Tpst1	410.072	170.97	649.173	3.79699	1.92486	4.11071e-05	0.000945395
ENSMUSG00000024232	Bambi	55.0326	22.9456	87.1195	3.79679	1.92478	0.00112128	0.0122837
ENSMUSG00000029419	Gm996	9.53036	3.97478	15.0859	3.79542	1.92426	0.0192915	0.0944915
ENSMUSG00000033597	Caskin1	302.433	126.261	478.605	3.79061	1.92243	0.000119348	0.00216432
ENSMUSG00000022092	Ppp3cc	318.17	132.856	503.484	3.78969	1.92208	7.00771e-05	0.00144857
ENSMUSG00000071073	Lrrc73	69.9773	29.2231	110.731	3.78918	1.92188	0.00194786	0.0183534
ENSMUSG00000040940	Arhgef1	199.787	83.4387	316.134	3.78882	1.92175	0.000157744	0.00269192
ENSMUSG00000043998	Mgat2	419.697	175.3	664.094	3.78833	1.92156	4.21036e-05	0.000957219
ENSMUSG00000068154	Insm1	9.65788	4.03752	15.2782	3.78406	1.91994	0.0129021	0.0717465
ENSMUSG00000022200	Golph3	1212.03	506.824	1917.24	3.78284	1.91947	4.33248e-06	0.000161781
ENSMUSG00000041120	Nbl1	56.4447	23.6052	89.2842	3.78239	1.9193	0.00127921	0.0134516
ENSMUSG00000033434	Gtpbp6	40.038	16.758	63.318	3.77837	1.91776	0.00295055	0.0250381
ENSMUSG00000020869	Lrrc59	877.354	367.235	1387.47	3.77816	1.91768	1.12431e-05	0.000344004
ENSMUSG00000074247	Dda1	792.077	331.557	1252.6	3.77792	1.91759	1.67655e-05	0.000466711
ENSMUSG00000040097	Flywch1	450.938	188.977	712.898	3.77241	1.91549	4.31474e-05	0.000974571
ENSMUSG00000004996	Mri1	151.761	63.614	239.907	3.77129	1.91506	0.000403031	0.0056665
ENSMUSG00000033055	Ankrd54	178.648	74.9575	282.338	3.76664	1.91328	0.00026442	0.00404076
ENSMUSG00000030602	Pak4	445.99	187.232	704.749	3.76404	1.91228	3.36733e-05	0.000807867
ENSMUSG00000049556	Lingo1	1562.36	655.962	2468.75	3.76355	1.9121	5.84797e-06	0.000200084
ENSMUSG00000053560	Ier2	68.8804	28.92	108.841	3.7635	1.91208	0.00123163	0.0131201
ENSMUSG00000034789	Rab24	218.251	91.6528	344.849	3.76256	1.91171	0.00020284	0.00330323
ENSMUSG00000074357	AA386476	11.9173	5.0074	18.8271	3.75986	1.91068	0.01767	0.0892886
ENSMUSG00000032500	Dclk3	147.524	62.0277	233.02	3.7567	1.90947	0.000331866	0.00484239
ENSMUSG00000035354	Uvrag	306.84	129.055	484.626	3.75519	1.90889	0.000126648	0.00227885
ENSMUSG00000044231	Nhlrc1	144.66	60.8503	228.47	3.75463	1.90867	0.000417461	0.00581057
ENSMUSG00000027808	Serp1	1116.67	470.409	1762.94	3.74766	1.90599	5.79064e-06	0.000199103
ENSMUSG00000027602	Map1lc3a	396.881	167.246	626.516	3.74608	1.90538	0.00011112	0.00205262
ENSMUSG00000021938	Pspc1	241.564	101.829	381.299	3.74451	1.90478	0.000146342	0.00253472
ENSMUSG00000078570	1110065P20Rik	38.8446	16.3885	61.3008	3.74048	1.90323	0.00359104	0.0288675
ENSMUSG00000028578	Caap1	191.449	80.8134	302.084	3.73804	1.90228	0.000243274	0.00379698
ENSMUSG00000020052	Ascl1	28.9266	12.2106	45.6427	3.73795	1.90225	0.0029176	0.024864
ENSMUSG00000024735	Prpf19	421.805	178.153	665.457	3.73532	1.90123	4.16283e-05	0.000950548
ENSMUSG00000026576	Atp1b1	6507.13	2748.54	10265.7	3.73497	1.9011	3.79409e-05	0.000887268
ENSMUSG00000015337	Endog	22.6669	9.59388	35.74	3.72529	1.89735	0.0046538	0.0345946
ENSMUSG00000025103	Btbd1	714.41	302.792	1126.03	3.71881	1.89484	2.05657e-05	0.000551124
ENSMUSG00000031029	Eif3f	380.239	161.183	599.295	3.7181	1.89457	9.90433e-05	0.00186824
ENSMUSG00000019997	Ctgf	609.187	258.769	959.604	3.70834	1.89077	1.87712e-05	0.000508286
ENSMUSG00000007944	Ttc9b	110.937	47.1465	174.727	3.70605	1.88988	0.00103467	0.0116241
ENSMUSG00000026207	Speg	387.308	164.798	609.818	3.7004	1.88768	9.36448e-05	0.00179671
ENSMUSG00000048481	Mypop	31.8848	13.5687	50.201	3.69978	1.88744	0.00382514	0.0301583
ENSMUSG00000038323	1700066M21Rik	443.373	188.856	697.89	3.69534	1.88571	3.5288e-05	0.000839359
ENSMUSG00000029581	Fscn1	366.844	156.552	577.135	3.68654	1.88227	0.000102475	0.00192103
ENSMUSG00000062300	Pvrl2	66.6435	28.4499	104.837	3.68497	1.88165	0.00119094	0.0128553
ENSMUSG00000097061	9330151L19Rik	181.482	77.4935	285.47	3.68379	1.88119	0.000251164	0.00388089
ENSMUSG00000027221	Chst1	991.131	423.608	1558.65	3.67947	1.8795	9.58113e-06	0.000301112
ENSMUSG00000059981	Taok2	671.599	287.077	1056.12	3.67888	1.87927	2.59099e-05	0.000657979
ENSMUSG00000033953	Ppp3r1	2760.94	1180.48	4341.39	3.67764	1.87878	1.42201e-05	0.000411524
ENSMUSG00000019889	Ptprk	1349.03	577.517	2120.54	3.67182	1.8765	7.68346e-06	0.000246969
ENSMUSG00000032263	Bckdhb	175.801	75.2886	276.314	3.67007	1.87581	0.00036511	0.0052286
ENSMUSG00000031447	Lamp1	1364.69	584.853	2144.52	3.66677	1.87451	1.19384e-05	0.000361299
ENSMUSG00000037573	Tob1	346.665	148.614	544.716	3.66531	1.87393	6.73227e-05	0.00140634
ENSMUSG00000052681	Rap1b	1603.61	687.613	2519.62	3.6643	1.87354	4.83118e-06	0.000172964
ENSMUSG00000039879	Heca	342.813	146.999	538.627	3.66416	1.87348	8.86294e-05	0.00172915
ENSMUSG00000020882	Cacnb1	454.692	195.295	714.089	3.65647	1.87045	4.75523e-05	0.00106712
ENSMUSG00000025854	Fam20c	278.69	119.784	437.596	3.65322	1.86917	0.000144957	0.00251699
ENSMUSG00000022436	Sh3bp1	547.774	235.634	859.915	3.64937	1.86765	5.38726e-05	0.00117295
ENSMUSG00000014444	Piezo1	27.614	11.8814	43.3466	3.64827	1.86721	0.00574148	0.0406084
ENSMUSG00000006442	Srm	307.867	132.532	483.203	3.64594	1.86629	0.000149405	0.00257812
ENSMUSG00000035900	Gramd4	320.415	137.962	502.869	3.64498	1.86591	0.000130233	0.00233128
ENSMUSG00000015599	Ttbk1	145.686	62.7558	228.617	3.64296	1.86511	0.000959997	0.0110575
ENSMUSG00000036955	2510003E04Rik	959.541	413.801	1505.28	3.63769	1.86302	1.51886e-05	0.000432346
ENSMUSG00000050288	Fzd2	120.407	51.9366	188.877	3.6367	1.86263	0.000542198	0.00712552
ENSMUSG00000022124	Fbxl3	950.602	410.041	1491.16	3.63662	1.8626	1.23972e-05	0.000370344
ENSMUSG00000022075	Rhobtb2	584.937	252.453	917.42	3.63402	1.86157	4.83211e-05	0.00107915
ENSMUSG00000030688	Stard10	33.0278	14.2642	51.7915	3.63086	1.86031	0.00455272	0.0341662
ENSMUSG00000026527	Rgs7	462.838	200.05	725.627	3.62723	1.85887	8.12054e-05	0.00162072
ENSMUSG00000035478	Mbd3	266.302	115.117	417.486	3.62661	1.85862	0.000254328	0.00391238
ENSMUSG00000032403	2300009A05Rik	82.7571	35.789	129.725	3.62472	1.85787	0.00097749	0.0111767
ENSMUSG00000085957	Syna	20.7308	8.9661	32.4955	3.62426	1.85769	0.00682284	0.0458896
ENSMUSG00000074873	AI606181	77.7602	33.6673	121.853	3.61933	1.85572	0.00102541	0.011571
ENSMUSG00000020083	2010107G23Rik	225.165	97.4973	352.833	3.6189	1.85555	0.000259135	0.00397312
ENSMUSG00000002763	Pex6	124.21	53.7884	194.631	3.61846	1.85538	0.000776474	0.00946971
ENSMUSG00000036285	Noa1	167.079	72.3928	261.765	3.6159	1.85435	0.000424277	0.00588762
ENSMUSG00000025016	Tm9sf3	1911.62	828.867	2994.38	3.61262	1.85304	9.18718e-06	0.000289386
ENSMUSG00000024513	Mbd2	197.785	85.7697	309.801	3.61201	1.8528	0.000231871	0.00366014
ENSMUSG00000032285	Dnaja4	76.1507	33.0389	119.263	3.60976	1.8519	0.0014051	0.0145117
ENSMUSG00000028796	Phc2	462.198	200.939	723.457	3.60038	1.84815	7.347e-05	0.00150305
ENSMUSG00000031230	Fgf16	13.9336	6.06179	21.8055	3.5972	1.84687	0.0108246	0.0638765
ENSMUSG00000059213	Ddn	493.57	214.795	772.346	3.59573	1.84628	0.000160234	0.0027144
ENSMUSG00000003528	Slc25a1	222.794	96.9695	348.619	3.59514	1.84605	0.000314199	0.00462167
ENSMUSG00000024969	Mark2	697.444	303.625	1091.26	3.59411	1.84563	2.24468e-05	0.000591711
ENSMUSG00000035226	Rims4	991.706	431.866	1551.55	3.59266	1.84505	1.99439e-05	0.000535862
ENSMUSG00000040331	Nsmce4a	182.744	79.585	285.904	3.59244	1.84496	0.00035175	0.00506862
ENSMUSG00000022296	Baalc	16.5814	7.22182	25.941	3.59203	1.8448	0.00847957	0.0536383
ENSMUSG00000034471	Caskin2	91.4831	39.8477	143.118	3.59164	1.84464	0.00116677	0.012692
ENSMUSG00000043881	Kbtbd7	692.494	301.735	1083.25	3.59008	1.84402	2.34513e-05	0.0006089
ENSMUSG00000046215	Rprml	209.31	91.213	327.408	3.58949	1.84378	0.000513667	0.00679768
ENSMUSG00000037771	Slc32a1	26.2908	11.4599	41.1217	3.58832	1.84331	0.00652693	0.0446189
ENSMUSG00000040390	Map3k10	127.258	55.4772	199.038	3.58775	1.84308	0.00086859	0.0102337
ENSMUSG00000050323	Ndufaf6	53.1552	23.206	83.1043	3.58115	1.84042	0.0021892	0.0199542
ENSMUSG00000003948	Mmd	689.613	301.126	1078.1	3.58024	1.84006	3.44748e-05	0.000821422
ENSMUSG00000047412	Zbtb44	832.311	363.587	1301.03	3.57833	1.83928	1.53981e-05	0.000437413
ENSMUSG00000037992	Rara	31.9405	13.9549	49.9262	3.57768	1.83902	0.00318042	0.0262972
ENSMUSG00000035329	Fbxo33	786.165	343.558	1228.77	3.5766	1.83859	1.84752e-05	0.000505196
ENSMUSG00000057614	Gnai1	2061.15	901.064	3221.24	3.57493	1.83792	1.08052e-05	0.000335035
ENSMUSG00000033701	Acbd6	124.66	54.5032	194.817	3.57442	1.83771	0.000853881	0.0101119
ENSMUSG00000022421	Nptxr	1421.11	621.692	2220.52	3.57174	1.83663	2.75011e-05	0.000690809
ENSMUSG00000052934	Fbxo31	787.642	344.643	1230.64	3.57076	1.83623	3.25754e-05	0.000787189
ENSMUSG00000032482	Cspg5	987.418	432.065	1542.77	3.57069	1.8362	2.26801e-05	0.000595557
ENSMUSG00000037933	Bicd2	958.992	419.713	1498.27	3.56975	1.83582	1.75202e-05	0.000483844
ENSMUSG00000030374	Strn4	1815.06	794.488	2835.64	3.56914	1.83558	1.32611e-05	0.000391104
ENSMUSG00000040563	Lppr2	604.942	264.846	945.038	3.56826	1.83522	5.91397e-05	0.00126581
ENSMUSG00000030435	U2af2	127.996	56.0407	199.952	3.56799	1.83511	0.000852651	0.010106
ENSMUSG00000007029	Vars	182.04	79.7272	284.353	3.56658	1.83454	0.000561638	0.00730795
ENSMUSG00000049300	Prmt6	211.861	92.819	330.904	3.56504	1.83392	0.000333393	0.00485956
ENSMUSG00000020235	Fzr1	503.205	220.682	785.727	3.56044	1.83206	0.000102019	0.00191506
ENSMUSG00000052584	Serp2	199.043	87.3167	310.768	3.55909	1.83151	0.000583575	0.00754087
ENSMUSG00000048988	Elfn1	68.9368	30.2459	107.628	3.55842	1.83124	0.00165663	0.0163092
ENSMUSG00000020525	Ppm1d	291.091	127.869	454.314	3.55297	1.82903	0.000145632	0.00252556
ENSMUSG00000032637	Atxn2l	238.133	104.635	371.631	3.5517	1.82851	0.000382457	0.00542667
ENSMUSG00000041205	Map6d1	555.59	244.428	866.753	3.54605	1.82621	4.4706e-05	0.00100813
ENSMUSG00000046417	Lrrc75a	85.0179	37.411	132.625	3.54508	1.82582	0.00118437	0.0128331
ENSMUSG00000022096	Hr	175.404	77.2022	273.606	3.54401	1.82538	0.000726633	0.00902025
ENSMUSG00000036186	Fam69b	349.161	153.78	544.543	3.54106	1.82418	0.000159819	0.00271399
ENSMUSG00000048920	Fkrp	314.541	138.54	490.541	3.5408	1.82407	0.000221278	0.00353558
ENSMUSG00000043252	Tmem64	748.491	329.681	1167.3	3.5407	1.82403	2.39001e-05	0.000615948
ENSMUSG00000028911	Srsf4	78.4859	34.5915	122.38	3.53787	1.82288	0.000961127	0.0110613
ENSMUSG00000001053	N4bp3	24.6421	10.868	38.4162	3.53479	1.82162	0.00602656	0.0420295
ENSMUSG00000049285	Mblac1	28.6424	12.6476	44.6373	3.5293	1.81938	0.00555967	0.0395845
ENSMUSG00000026820	Ptges2	228.07	100.725	355.414	3.52855	1.81908	0.000348783	0.00503632
ENSMUSG00000038895	Zfp653	87.3022	38.5729	136.031	3.52661	1.81828	0.00159724	0.0158707
ENSMUSG00000040875	Osbpl10	182.917	80.868	284.967	3.52385	1.81715	0.00044876	0.00613309
ENSMUSG00000037217	Syn1	934.47	413.563	1455.38	3.51911	1.81521	3.72885e-05	0.000879413
ENSMUSG00000056917	Sipa1	105.422	46.6864	164.157	3.51617	1.814	0.00115439	0.0125967
ENSMUSG00000047213	Ythdf3	1620.02	717.839	2522.21	3.51361	1.81295	1.34436e-05	0.00039481
ENSMUSG00000046556	Zfp319	157.953	70.0097	245.896	3.51231	1.81242	0.000547946	0.00718745
ENSMUSG00000055717	Slain1	582.486	258.474	906.498	3.50711	1.81028	4.16196e-05	0.000950548
ENSMUSG00000035828	Pim3	240.465	106.834	374.096	3.50167	1.80804	0.000310698	0.00459139
ENSMUSG00000008318	Relt	62.5374	27.7998	97.275	3.49913	1.807	0.00297494	0.0251712
ENSMUSG00000028849	Map7d1	565.316	251.328	879.303	3.49863	1.80679	6.44618e-05	0.00136085
ENSMUSG00000062373	Tmem65	1237.27	550.201	1924.34	3.49752	1.80633	1.82598e-05	0.000500291
ENSMUSG00000049482	Ctu2	111.187	49.4895	172.885	3.49336	1.80462	0.00139386	0.0144278
ENSMUSG00000027582	Zgpat	307.102	136.773	477.432	3.49069	1.80351	0.000303074	0.00450749
ENSMUSG00000038976	Ppp1r9b	528.833	235.528	822.138	3.49062	1.80348	0.000142004	0.00248435
ENSMUSG00000042116	Vwa1	138.541	61.7181	215.365	3.4895	1.80302	0.000471643	0.00637315
ENSMUSG00000041609	Ccdc64	340.431	151.83	529.031	3.48436	1.8009	0.000172742	0.00288756
ENSMUSG00000036825	Ssx2ip	1255.36	560.111	1950.61	3.48253	1.80014	1.91353e-05	0.000516133
ENSMUSG00000024851	Pitpnm1	483.518	215.806	751.23	3.48104	1.79952	0.000121669	0.00220065
ENSMUSG00000035632	Cnot3	116.097	51.8252	180.369	3.48034	1.79923	0.000881151	0.0103118
ENSMUSG00000025738	Fbxl16	1258.76	561.927	1955.59	3.48015	1.79915	3.03684e-05	0.000749284
ENSMUSG00000030189	Ybx3	386.834	172.705	600.962	3.47971	1.79897	0.000138447	0.00244366
ENSMUSG00000038990	Cables2	292.565	130.648	454.483	3.47869	1.79854	0.000233696	0.00368057
ENSMUSG00000035370	Adat3	35.8322	16.0035	55.661	3.47806	1.79828	0.00389905	0.0305826
ENSMUSG00000052656	Rnf103	756.894	338.398	1175.39	3.47339	1.79635	4.16074e-05	0.000950548
ENSMUSG00000006585	Cdt1	18.1966	8.15386	28.2393	3.4633	1.79215	0.00951717	0.0582392
ENSMUSG00000029550	Sppl3	657.539	294.686	1020.39	3.46265	1.79188	5.67309e-05	0.00122368
ENSMUSG00000022634	Yaf2	723.804	324.391	1123.22	3.46254	1.79183	4.78832e-05	0.00107282
ENSMUSG00000001247	Lsr	31.4183	14.0876	48.749	3.46041	1.79094	0.00398144	0.0310883
ENSMUSG00000030704	Rab6a	3210.4	1439.77	4981.04	3.45961	1.79061	2.38791e-05	0.000615948
ENSMUSG00000058709	Egln2	476.282	213.662	738.902	3.45827	1.79005	0.000150796	0.0025989
ENSMUSG00000005057	Sh2b2	100.318	45.0304	155.606	3.45558	1.78893	0.000797746	0.00965055
ENSMUSG00000038255	Neurod2	301.551	135.425	467.676	3.45339	1.78801	0.000223897	0.00355446
ENSMUSG00000051146	Camk2n2	163.734	73.5337	253.935	3.45332	1.78798	0.00100008	0.0113591
ENSMUSG00000029196	Tada2b	347.045	155.96	538.131	3.45045	1.78678	0.000156382	0.00267526
ENSMUSG00000022848	Dirc2	703.322	316.237	1090.41	3.44807	1.78579	5.0365e-05	0.00111404
ENSMUSG00000042178	Armc5	97.4481	43.8307	151.066	3.44657	1.78516	0.00189402	0.0180451
ENSMUSG00000021144	Mta1	184.046	82.7816	285.311	3.44655	1.78515	0.000656341	0.00827335
ENSMUSG00000028041	Adam15	174.851	78.6596	271.043	3.44578	1.78483	0.000737686	0.00913298
ENSMUSG00000042529	Kcnj12	35.1226	15.8048	54.4403	3.44454	1.78431	0.00572674	0.0405248
ENSMUSG00000029055	Plch2	45.5037	20.4862	70.5212	3.44237	1.7834	0.00422358	0.0323003
ENSMUSG00000035764	Fbxo45	839.758	378.119	1301.4	3.44176	1.78315	3.62062e-05	0.000856798
ENSMUSG00000003269	Cyth2	414.589	186.74	642.438	3.44027	1.78252	0.00019974	0.00326422
ENSMUSG00000073563	Csnk1g3	1409.54	635.278	2183.81	3.43757	1.78139	1.55682e-05	0.000441341
ENSMUSG00000025577	Cbx2	34.4753	15.539	53.4116	3.43726	1.78126	0.00432578	0.0328897
ENSMUSG00000022698	Naa50	1030.63	464.74	1596.51	3.43528	1.78043	2.45811e-05	0.000630757
ENSMUSG00000090946	Ccdc71l	270.767	122.177	419.357	3.43237	1.7792	0.000238926	0.00374296
ENSMUSG00000001988	Npas1	15.9914	7.21614	24.7667	3.43213	1.7791	0.0163399	0.0847564
ENSMUSG00000020868	Xylt2	202.411	91.4078	313.415	3.42876	1.77768	0.000700158	0.0087306
ENSMUSG00000036432	Siah2	250.94	113.37	388.511	3.42695	1.77692	0.00029547	0.00441806
ENSMUSG00000039263	Npepl1	56.7318	25.6428	87.8207	3.42478	1.77601	0.00342387	0.0277486
ENSMUSG00000038212	Hiatl1	729.307	329.787	1128.83	3.42289	1.77521	4.26515e-05	0.000968092
ENSMUSG00000058441	Panx2	108.491	49.0623	167.92	3.42259	1.77509	0.00180271	0.0173298
ENSMUSG00000041617	Ccdc74a	25.1454	11.376	38.9149	3.42079	1.77433	0.00978032	0.0592751
ENSMUSG00000028670	Lypla2	189.428	85.7344	293.122	3.41895	1.77355	0.000460705	0.00626189
ENSMUSG00000026269	Rnpepl1	314.547	142.414	486.68	3.41737	1.77289	0.000251573	0.00388288
ENSMUSG00000006731	B4galnt1	335.716	152.029	519.403	3.41647	1.77251	0.000419682	0.00582981
ENSMUSG00000031486	Gpr124	22.8714	10.3601	35.3827	3.4153	1.77201	0.00604255	0.0420737
ENSMUSG00000018661	Cog1	225.919	102.399	349.439	3.41252	1.77084	0.000484828	0.00651303
ENSMUSG00000034854	Mfsd12	135.688	61.5289	209.848	3.41055	1.77001	0.00117471	0.0127583
ENSMUSG00000020003	Pex7	153.928	69.8083	238.048	3.41003	1.76978	0.000929112	0.0107566
ENSMUSG00000072494	Ppp1r3e	16.5587	7.51001	25.6075	3.40978	1.76968	0.0107102	0.0634165
ENSMUSG00000030122	Ptms	160.126	72.6637	247.588	3.40731	1.76863	0.00123274	0.0131218
ENSMUSG00000032968	Inha	234.804	106.564	363.043	3.40681	1.76842	0.000514243	0.00679768
ENSMUSG00000040345	Arhgap9	8.49393	3.85559	13.1323	3.40604	1.76809	0.0204588	0.0982009
ENSMUSG00000015468	Notch4	30.8634	14.0145	47.7123	3.4045	1.76744	0.00518483	0.03759
ENSMUSG00000032046	Abhd12	731.181	332.4	1129.96	3.3994	1.76528	9.4003e-05	0.0018011
ENSMUSG00000030329	Pianp	165.368	75.1862	255.55	3.39889	1.76506	0.00124076	0.013187
ENSMUSG00000039148	Sart1	225.827	102.715	348.938	3.39714	1.76432	0.00068075	0.00854228
ENSMUSG00000034673	Pbx2	91.5354	41.6355	141.435	3.39699	1.76426	0.00178813	0.0172493
ENSMUSG00000036873	2410004B18Rik	243.567	110.845	376.288	3.39473	1.7633	0.000346289	0.00500559
ENSMUSG00000032485	Scap	335.647	152.779	518.515	3.39388	1.76294	0.000299588	0.00447001
ENSMUSG00000031438	Rnf128	139.685	63.6307	215.74	3.3905	1.7615	0.000875771	0.0102661
ENSMUSG00000091243	Vgll3	17.3205	7.89058	26.7503	3.39016	1.76135	0.00894844	0.0556662
ENSMUSG00000044328	Trp53i13	16.9123	7.70803	26.1165	3.38822	1.76053	0.0163689	0.0847802
ENSMUSG00000030876	Mettl9	379.248	172.939	585.558	3.38592	1.75955	0.000190222	0.00313449
ENSMUSG00000025034	Trim8	407.499	185.872	629.126	3.38473	1.75904	0.000143267	0.00249702
ENSMUSG00000041130	Zfp598	115.798	52.8321	178.764	3.38363	1.75857	0.00159666	0.0158707
ENSMUSG00000022208	Jph4	783.788	357.619	1209.96	3.38337	1.75846	7.88386e-05	0.0015803
ENSMUSG00000004891	Nes	132.904	60.6662	205.141	3.38147	1.75765	0.000849426	0.0100849
ENSMUSG00000036529	Sbf1	433.712	198.001	669.423	3.3809	1.75741	0.000248079	0.00385466
ENSMUSG00000013787	Ehmt2	381.781	174.361	589.202	3.37921	1.75668	0.000322133	0.00471522
ENSMUSG00000043670	Diras1	243.046	111.113	374.979	3.37475	1.75478	0.000419648	0.00582981
ENSMUSG00000037692	Ahdc1	142.724	65.2561	220.191	3.37426	1.75457	0.000741878	0.009157
ENSMUSG00000020894	Vamp2	2528.62	1156.73	3900.51	3.37202	1.75361	5.78799e-05	0.00124076
ENSMUSG00000040234	Tm7sf3	428.941	196.254	661.628	3.37129	1.7533	0.000180156	0.0029899
ENSMUSG00000034607	Pof1b	18.5161	8.4799	28.5523	3.36705	1.75149	0.0132238	0.0730678
ENSMUSG00000037643	Prkci	717.442	328.831	1106.05	3.36359	1.75	6.51747e-05	0.00137173
ENSMUSG00000000282	Mnt	212.239	97.2996	327.179	3.36259	1.74957	0.00060507	0.00776088
ENSMUSG00000010086	Rnf112	775.836	355.778	1195.89	3.36134	1.74904	6.33403e-05	0.00134125
ENSMUSG00000027765	P2ry1	22.1523	10.1589	34.1456	3.36115	1.74896	0.0119072	0.0678759
ENSMUSG00000035847	Ids	1192.09	546.706	1837.47	3.36098	1.74888	4.48159e-05	0.00100898
ENSMUSG00000095407	Tmem200c	30.6209	14.0549	47.1869	3.35733	1.74732	0.00932702	0.0574553
ENSMUSG00000063382	Bcl9l	87.8178	40.3235	135.312	3.35566	1.7466	0.00190794	0.0180909
ENSMUSG00000051062	Fbll1	55.5301	25.5314	85.5288	3.34994	1.74413	0.00398705	0.0310972
ENSMUSG00000020496	Rnf187	1117.71	513.921	1721.5	3.34973	1.74405	7.02281e-05	0.00144954
ENSMUSG00000041203	2310036O22Rik	127.213	58.5486	195.877	3.34555	1.74224	0.00144402	0.0147818
ENSMUSG00000000247	Lhx2	231.093	106.504	355.682	3.33961	1.73968	0.000659045	0.00829239
ENSMUSG00000022131	Gpr180	307.222	141.636	472.808	3.33819	1.73907	0.000402191	0.00566042
ENSMUSG00000052981	Ube2ql1	1030.9	475.29	1586.52	3.33799	1.73898	5.94335e-05	0.00127014
ENSMUSG00000044916	1700029I15Rik	21.8592	10.0801	33.6383	3.33711	1.7386	0.0110925	0.0648239
ENSMUSG00000023571	Fam132a	35.305	16.286	54.3241	3.33564	1.73796	0.00549395	0.0392171
ENSMUSG00000061374	Fiz1	227.045	104.916	349.173	3.3281	1.7347	0.000485277	0.00651303
ENSMUSG00000040659	Efhd2	441.003	203.803	678.202	3.32773	1.73454	0.000204853	0.00332432
ENSMUSG00000044982	Sft2d3	92.5562	42.7828	142.329	3.32679	1.73413	0.0017761	0.0171571
ENSMUSG00000053552	Ebf4	38.2214	17.6932	58.7497	3.32047	1.73139	0.00676362	0.0456913
ENSMUSG00000024798	Htr7	43.1588	19.9788	66.3387	3.32045	1.73138	0.00325377	0.0266813
ENSMUSG00000035011	Zbtb7a	425.391	196.933	653.849	3.32015	1.73125	0.000103523	0.00193284
ENSMUSG00000001763	Tspan33	145.75	67.5298	223.97	3.31661	1.72971	0.00110508	0.0121734
ENSMUSG00000028793	Rnf19b	409.454	189.722	629.186	3.31636	1.7296	0.000235477	0.00369606
ENSMUSG00000032199	Polr2m	812.168	376.58	1247.76	3.31339	1.72831	9.8421e-05	0.00186009
ENSMUSG00000035397	Klf16	78.6801	36.4821	120.878	3.31336	1.7283	0.00202057	0.0188298
ENSMUSG00000036902	Neto2	2133.4	990.104	3276.7	3.30945	1.72659	3.39519e-05	0.000811748
ENSMUSG00000023286	Ube2j2	216.598	100.531	332.665	3.3091	1.72644	0.000601755	0.00772549
ENSMUSG00000021259	Cyp46a1	429.539	199.401	659.677	3.3083	1.72609	0.000253078	0.00390178
ENSMUSG00000039108	Lsm14b	156.432	72.6192	240.244	3.30828	1.72608	0.000746282	0.00919025
ENSMUSG00000022663	Atg3	398.519	185.07	611.969	3.30669	1.72539	0.00026989	0.0041018
ENSMUSG00000020312	Shc2	471.305	218.883	723.727	3.30645	1.72528	0.000188542	0.0031142
ENSMUSG00000055945	Prr18	60.9282	28.309	93.5474	3.30451	1.72444	0.00284102	0.0243458
ENSMUSG00000059851	Suv420h2	147.52	68.5423	226.498	3.30451	1.72444	0.00137918	0.0142988
ENSMUSG00000022332	Khdrbs3	732.392	340.297	1124.49	3.30443	1.7244	0.000105806	0.00196753
ENSMUSG00000053465	Hs6st3	37.5743	17.4762	57.6723	3.30004	1.72248	0.004827	0.0355713
ENSMUSG00000040396	Abhd13	999.043	464.722	1533.36	3.29953	1.72226	5.56342e-05	0.00120564
ENSMUSG00000071054	Safb	471.231	219.345	723.116	3.2967	1.72102	0.000197683	0.00323562
ENSMUSG00000037740	Mrps26	230.031	107.082	352.979	3.29633	1.72086	0.000742263	0.009157
ENSMUSG00000012429	Mplkip	201.389	93.874	308.904	3.29062	1.71836	0.000835097	0.00996592
ENSMUSG00000028381	Ugcg	1808.91	843.827	2773.99	3.28739	1.71694	2.21451e-05	0.000585937
ENSMUSG00000067889	Sptbn2	2884.42	1345.57	4423.27	3.28728	1.7169	9.75865e-05	0.00184683
ENSMUSG00000020135	Apc2	955.745	445.922	1465.57	3.2866	1.71659	5.66501e-05	0.00122368
ENSMUSG00000046269	Usp27x	123.47	57.6184	189.321	3.28578	1.71624	0.00120936	0.0129623
ENSMUSG00000028756	Pink1	456.837	213.419	700.255	3.28113	1.71419	0.000394053	0.0055798
ENSMUSG00000037747	Phyhipl	1163.37	543.678	1783.06	3.27962	1.71353	5.31617e-05	0.00116112
ENSMUSG00000059022	Kcp	22.2584	10.4036	34.1133	3.279	1.71325	0.0086047	0.0541585
ENSMUSG00000018474	Chd3	1037.83	485.372	1590.28	3.27642	1.71212	9.01854e-05	0.00174676
ENSMUSG00000044628	Rnf208	310.613	145.276	475.95	3.27617	1.71201	0.000561867	0.00730795
ENSMUSG00000036002	Fam214b	241.425	112.959	369.891	3.27455	1.7113	0.000459872	0.00625669
ENSMUSG00000028743	Akr7a5	62.5505	29.2723	95.8287	3.2737	1.71092	0.00550175	0.0392325
ENSMUSG00000020134	Peli1	1069.69	501.02	1638.35	3.27003	1.70931	3.1733e-05	0.000776755
ENSMUSG00000026090	2010300C02Rik	642.168	300.8	983.536	3.26973	1.70917	0.000142207	0.00248477
ENSMUSG00000023017	Asic1	347.445	162.877	532.013	3.26636	1.70768	0.000368227	0.00526781
ENSMUSG00000045414	1190002N15Rik	821.526	385.314	1257.74	3.26419	1.70672	5.76414e-05	0.00123755
ENSMUSG00000047181	Samd14	291.991	137.058	446.924	3.26083	1.70524	0.00087237	0.0102609
ENSMUSG00000020926	Adam11	714.417	335.359	1093.48	3.26062	1.70515	0.000158124	0.00269509
ENSMUSG00000042742	B630005N14Rik	1261.26	592.107	1930.42	3.26025	1.70498	4.07066e-05	0.000937736
ENSMUSG00000042734	Ttc9	212.07	99.614	324.526	3.25784	1.70392	0.00104328	0.0116685
ENSMUSG00000042644	Itpr3	15.9362	7.48825	24.3842	3.25633	1.70324	0.0112872	0.0656066
ENSMUSG00000013833	Med16	170.414	80.1659	260.661	3.25152	1.70112	0.00195754	0.0184104
ENSMUSG00000040842	Szrd1	128.793	60.6151	196.971	3.24954	1.70023	0.00126802	0.0133845
ENSMUSG00000031805	Jak3	13.5651	6.38529	20.7448	3.24885	1.69993	0.0104333	0.0621776
ENSMUSG00000030638	Sh3gl3	200.389	94.3446	306.434	3.24803	1.69957	0.00119304	0.0128554
ENSMUSG00000032977	Fam207a	180.349	84.9316	275.767	3.24692	1.69907	0.00102172	0.0115388
ENSMUSG00000042423	Fbrs	184.417	86.8601	281.974	3.2463	1.6988	0.0012213	0.01305
ENSMUSG00000048027	Rgmb	378.114	178.141	578.086	3.2451	1.69826	0.000343591	0.00498206
ENSMUSG00000041837	Pdcd7	220.196	103.772	336.621	3.24386	1.69771	0.000822621	0.00988497
ENSMUSG00000021775	Nr1d2	1217.02	573.605	1860.43	3.2434	1.69751	3.54717e-05	0.000842285
ENSMUSG00000041115	Iqsec2	266.207	125.472	406.941	3.24328	1.69745	0.000610578	0.0078243
ENSMUSG00000021730	Hcn1	434.545	204.899	664.192	3.24156	1.69669	0.000346294	0.00500559
ENSMUSG00000028291	Akirin2	389.18	183.526	594.835	3.24115	1.69651	0.000277906	0.00419608
ENSMUSG00000002396	Ocel1	131.228	61.9101	200.547	3.23932	1.69569	0.00205152	0.0190238
ENSMUSG00000034254	Agpat1	258.651	122.103	395.199	3.2366	1.69448	0.00102635	0.0115723
ENSMUSG00000040964	Arhgef10l	159.274	75.1959	243.353	3.23625	1.69432	0.00132261	0.0138035
ENSMUSG00000039899	Fgl2	19.8067	9.35235	30.2611	3.23567	1.69406	0.0122859	0.0691503
ENSMUSG00000057143	Trim12c	44.4994	21.0518	67.9469	3.2276	1.69046	0.00559552	0.0397896
ENSMUSG00000032014	Oaf	96.3658	45.6269	147.105	3.22407	1.68888	0.00247048	0.0219281
ENSMUSG00000028988	Ctnnbip1	300.258	142.226	458.29	3.22226	1.68807	0.000678402	0.00852051
ENSMUSG00000032875	Arhgef17	504.927	239.596	770.257	3.21482	1.68474	0.000202633	0.00330323
ENSMUSG00000050947	Amigo1	498.558	236.692	760.424	3.21271	1.68379	0.000250025	0.00387006
ENSMUSG00000030731	Syt3	178.617	84.8179	272.416	3.21177	1.68337	0.00167042	0.0164061
ENSMUSG00000033106	Slc7a6os	149.154	70.8516	227.457	3.21032	1.68272	0.00167238	0.0164061
ENSMUSG00000026885	Ttll11	147.369	70.0315	224.707	3.20865	1.68197	0.00158848	0.0158515
ENSMUSG00000009376	Met	663.167	315.41	1010.92	3.20511	1.68037	0.000140118	0.00246377
ENSMUSG00000011877	Git1	522.145	248.437	795.854	3.20344	1.67962	0.000301351	0.00448683
ENSMUSG00000038848	Ythdf1	863.335	410.789	1315.88	3.2033	1.67956	8.60487e-05	0.00169067
ENSMUSG00000029163	Emilin1	16.5802	7.89311	25.2672	3.20117	1.6786	0.0138895	0.0755907
ENSMUSG00000030530	Furin	170.881	81.3768	260.385	3.19975	1.67796	0.000883208	0.0103185
ENSMUSG00000043415	Otud1	161.719	77.0211	246.417	3.19934	1.67777	0.00109684	0.0121115
ENSMUSG00000030780	BC017158	130.75	62.273	199.228	3.19926	1.67774	0.002627	0.0229941
ENSMUSG00000037035	Inhbb	33.1335	15.7915	50.4754	3.19635	1.67643	0.00713574	0.0474498
ENSMUSG00000034412	Tbc1d10a	230.002	109.632	350.372	3.19589	1.67622	0.00095115	0.0109738
ENSMUSG00000029385	Ccng2	652.732	311.192	994.272	3.19504	1.67584	0.000109585	0.00202695
ENSMUSG00000032997	Chpf	285.161	135.975	434.346	3.1943	1.6755	0.000895327	0.0104419
ENSMUSG00000025743	Sdc3	1434.38	684.072	2184.68	3.19364	1.6752	9.2035e-05	0.00177317
ENSMUSG00000062075	Lmnb2	167.339	79.8312	254.847	3.19232	1.67461	0.00162828	0.01611
ENSMUSG00000033726	Emx1	93.7604	44.7429	142.778	3.19108	1.67404	0.00351386	0.0283785
ENSMUSG00000017299	Dnttip1	149.891	71.5645	228.217	3.18897	1.67309	0.00127337	0.0134206
ENSMUSG00000029528	Pxn	101.528	48.477	154.578	3.1887	1.67297	0.00305681	0.0256414
ENSMUSG00000008859	Rala	1131.99	540.502	1723.49	3.18868	1.67296	6.04166e-05	0.00128719
ENSMUSG00000025436	Xrcc6bp1	23.8975	11.417	36.3779	3.1863	1.67188	0.0108209	0.0638765
ENSMUSG00000031790	Mmp15	46.0908	22.0262	70.1554	3.18509	1.67134	0.00827129	0.0526996
ENSMUSG00000019861	Gopc	1074.4	513.859	1634.94	3.18169	1.6698	6.91979e-05	0.00144112
ENSMUSG00000040570	Rundc3b	819.544	392.006	1247.08	3.18129	1.66961	0.000106834	0.001984
ENSMUSG00000039860	Srrm3	250.349	119.777	380.922	3.18026	1.66915	0.00057958	0.00750321
ENSMUSG00000031971	Ccsap	447.9	214.362	681.439	3.17893	1.66854	0.00044403	0.00608887
ENSMUSG00000055629	B4galnt4	222.381	106.435	338.327	3.17871	1.66844	0.00125271	0.0132714
ENSMUSG00000022559	Fbxl6	137.325	65.7742	208.876	3.17566	1.66706	0.00157986	0.0157884
ENSMUSG00000016526	Dyrk3	124.057	59.4283	188.686	3.17502	1.66676	0.0029845	0.0252329
ENSMUSG00000028347	Tmeff1	603.894	289.357	918.43	3.17404	1.66632	0.00022356	0.00355317
ENSMUSG00000061979	Wbscr16	127.184	60.9654	193.402	3.17232	1.66554	0.00159011	0.0158515
ENSMUSG00000030265	Kras	1898.33	910.977	2885.69	3.16769	1.66343	5.13846e-05	0.00113119
ENSMUSG00000029312	Klhl8	467.074	224.277	709.87	3.16515	1.66227	0.000311631	0.00459539
ENSMUSG00000028078	Dclk2	477.489	229.308	725.669	3.16461	1.66203	0.000350656	0.00505811
ENSMUSG00000074406	Zfp628	41.8693	20.1141	63.6244	3.16317	1.66137	0.00656235	0.044759
ENSMUSG00000017386	Traf4	113.224	54.4007	172.048	3.16261	1.66112	0.00207735	0.0192121
ENSMUSG00000030101	Sumf1	205.257	98.6472	311.867	3.16144	1.66058	0.00123602	0.0131467
ENSMUSG00000019189	Rnf145	1028.65	494.578	1562.71	3.15969	1.65978	7.67669e-05	0.00154995
ENSMUSG00000053128	Rnf26	129.306	62.1781	196.433	3.15921	1.65956	0.00268729	0.0233892
ENSMUSG00000020627	Klhl29	198.547	95.5096	301.585	3.15764	1.65885	0.00127178	0.013414
ENSMUSG00000037808	Fam76b	504.173	242.734	765.611	3.15412	1.65724	0.000266503	0.00406812
ENSMUSG00000059842	Zfp341	94.0541	45.2874	142.821	3.15366	1.65703	0.00297539	0.0251712
ENSMUSG00000070527	Mkrn3	225.374	108.554	342.195	3.15231	1.65641	0.00105642	0.0117586
ENSMUSG00000061650	Med9	186.678	89.928	283.428	3.15172	1.65614	0.00135709	0.0141314
ENSMUSG00000031807	Pgls	122.722	59.1253	186.319	3.15126	1.65593	0.00214001	0.0196476
ENSMUSG00000052105	Mtcl1	743.901	358.594	1129.21	3.14899	1.65489	9.45605e-05	0.00180928
ENSMUSG00000024750	Zfand5	2448.5	1180.75	3716.25	3.14737	1.65415	5.72085e-05	0.00123207
ENSMUSG00000070808	Gltscr1	46.0159	22.1907	69.841	3.1473	1.65412	0.00422502	0.0323003
ENSMUSG00000068917	Clk2	293.176	141.39	444.962	3.14705	1.654	0.000533978	0.00703079
ENSMUSG00000026155	Smap1	309.899	149.473	470.325	3.14655	1.65377	0.000740153	0.00914721
ENSMUSG00000052364	B630019K06Rik	81.5654	39.3864	123.744	3.14181	1.6516	0.00296809	0.0251401
ENSMUSG00000038605	Samd10	372.821	180.178	565.464	3.13836	1.65001	0.000443253	0.00608421
ENSMUSG00000045598	Zfp553	154.489	74.7074	234.27	3.13584	1.64885	0.00165398	0.0163062
ENSMUSG00000045733	Sprn	1584.99	766.993	2402.98	3.13299	1.64754	8.83905e-05	0.00172915
ENSMUSG00000005312	Ubqln1	1356.67	656.606	2056.72	3.13236	1.64725	8.92362e-05	0.00173368
ENSMUSG00000022554	Hgh1	55.3976	26.8274	83.9679	3.12994	1.64613	0.00649893	0.044537
ENSMUSG00000025825	Iscu	95.8537	46.5127	145.195	3.12161	1.64229	0.00314306	0.0261282
ENSMUSG00000020834	Dhrs13	114.304	55.4822	173.125	3.12037	1.64172	0.00198157	0.018561
ENSMUSG00000001248	Gramd1a	598.58	290.685	906.475	3.11841	1.64081	0.000407659	0.00571422
ENSMUSG00000038168	Leprel1	18.9267	9.19155	28.6618	3.11827	1.64075	0.0193067	0.0945328
ENSMUSG00000030525	Chrna7	74.4132	36.1475	112.679	3.11719	1.64025	0.00457952	0.0342749
ENSMUSG00000019777	Hdac2	947.87	460.492	1435.25	3.11677	1.64005	0.000131801	0.00234577
ENSMUSG00000016503	Gtf3a	25.6107	12.4547	38.7667	3.11263	1.63813	0.0123528	0.0694871
ENSMUSG00000033735	Spr	60.8119	29.574	92.0497	3.11252	1.63808	0.00656677	0.044759
ENSMUSG00000040010	Slc7a5	865.275	420.953	1309.6	3.11103	1.63739	0.000153628	0.00263268
ENSMUSG00000031534	Smim19	103.047	50.1665	155.928	3.10821	1.63608	0.00386941	0.030436
ENSMUSG00000015605	Srf	150.545	73.3929	227.697	3.10244	1.6334	0.00156906	0.0157257
ENSMUSG00000069237	C78339	658.699	321.455	995.944	3.09823	1.63145	0.00018233	0.00301876
ENSMUSG00000014773	Dll1	61.5099	30.0211	92.9987	3.09778	1.63123	0.004469	0.0336912
ENSMUSG00000048895	Cdk5r1	1451.32	709.906	2192.73	3.08876	1.62703	7.65178e-05	0.00154718
ENSMUSG00000037169	Mycn	263.525	128.915	398.136	3.08835	1.62684	0.000595467	0.00766602
ENSMUSG00000046761	Fam83h	22.8511	11.1915	34.5106	3.08364	1.62463	0.010883	0.0640846
ENSMUSG00000072825	Cep170b	860.237	421.375	1299.1	3.083	1.62434	0.000245573	0.00382428
ENSMUSG00000025576	Rbfox3	1216.8	596.088	1837.51	3.08262	1.62416	0.000113797	0.00208269
ENSMUSG00000028646	Rragc	738.392	361.769	1115.02	3.08212	1.62392	0.000179156	0.00297975
ENSMUSG00000020038	Cry1	159.481	78.1424	240.819	3.0818	1.62377	0.00192815	0.0182328
ENSMUSG00000066568	Lsm14a	679.801	333.099	1026.5	3.08168	1.62372	0.000193226	0.00317645
ENSMUSG00000001435	Col18a1	33.3871	16.3642	50.41	3.08051	1.62317	0.0136	0.0745238
ENSMUSG00000020827	Mink1	301.235	147.676	454.794	3.07968	1.62278	0.00129458	0.0135824
ENSMUSG00000028677	Rnf220	497.523	244.019	751.026	3.07773	1.62187	0.000447735	0.00612758
ENSMUSG00000026796	Fam129b	118.416	58.0822	178.75	3.07754	1.62178	0.00244788	0.0217591
ENSMUSG00000038181	Chpf2	166.48	81.6645	251.296	3.07718	1.62161	0.00240681	0.0215056
ENSMUSG00000042115	Klhdc8a	127.555	62.5988	192.512	3.07534	1.62074	0.00358166	0.0288522
ENSMUSG00000001729	Akt1	415.475	203.936	627.014	3.07456	1.62038	0.000825244	0.00990792
ENSMUSG00000023328	Ache	145.998	71.6841	220.312	3.07337	1.61982	0.00281649	0.0241953
ENSMUSG00000025225	Nfkb2	18.5721	9.1269	28.0173	3.06976	1.61812	0.0112147	0.0652631
ENSMUSG00000010066	Cacna2d2	52.3229	25.7159	78.9299	3.0693	1.61791	0.00881382	0.0551251
ENSMUSG00000020358	Hnrnpab	457.123	224.77	689.476	3.06747	1.61705	0.00045732	0.00622806
ENSMUSG00000029861	Fam131b	224.341	110.457	338.226	3.06205	1.6145	0.00207665	0.0192121
ENSMUSG00000036856	Wnt4	103.774	51.0963	156.451	3.06189	1.61442	0.00320271	0.02645
ENSMUSG00000031822	Gse1	28.0978	13.8376	42.3579	3.06107	1.61404	0.0156583	0.082234
ENSMUSG00000030093	Wnt7a	34.3483	16.9163	51.7803	3.06098	1.61399	0.00804612	0.0516491
ENSMUSG00000027358	Bmp2	43.924	21.6547	66.1934	3.05676	1.61201	0.00938117	0.057661
ENSMUSG00000036282	Naa30	928.318	457.746	1398.89	3.05604	1.61166	0.000125717	0.00226797
ENSMUSG00000039372	March4	469.285	231.417	707.152	3.05575	1.61153	0.000462691	0.00628273
ENSMUSG00000036442	Thap11	191.725	94.5713	288.879	3.05462	1.61099	0.0017656	0.0170794
ENSMUSG00000024797	Vps51	267.27	131.898	402.641	3.05266	1.61007	0.00137085	0.0142534
ENSMUSG00000029538	Srsf9	262.52	129.559	395.482	3.05253	1.61001	0.00118575	0.0128381
ENSMUSG00000041629	Fam104a	198.673	98.1046	299.241	3.05022	1.60891	0.00148624	0.0151026
ENSMUSG00000049721	Gal3st1	50.9034	25.1515	76.6553	3.04775	1.60774	0.00753736	0.0493875
ENSMUSG00000030087	Klf15	302.226	149.338	455.115	3.04755	1.60765	0.000772216	0.00942622
ENSMUSG00000036686	Cc2d1a	204.494	101.081	307.907	3.04614	1.60698	0.00274427	0.0237957
ENSMUSG00000091890	A830073O21Rik	60.4583	29.8849	91.0317	3.04608	1.60695	0.00542676	0.0388573
ENSMUSG00000024601	Isoc1	166.821	82.4644	251.177	3.04588	1.60686	0.00236053	0.0212473
ENSMUSG00000031065	Cdk16	956.923	473.379	1440.47	3.04294	1.60547	0.000290011	0.00434579
ENSMUSG00000024949	Sf1	801.931	396.916	1206.95	3.04081	1.60446	0.000216706	0.00347605
ENSMUSG00000026525	Opn3	219.541	108.745	330.336	3.0377	1.60298	0.00126552	0.0133683
ENSMUSG00000009555	Cdk9	395.826	196.308	595.345	3.03271	1.60061	0.000794758	0.00963349
ENSMUSG00000039741	Bahcc1	74.4637	36.9497	111.978	3.03055	1.59958	0.00401134	0.0312515
ENSMUSG00000040488	Ltbp4	155.387	77.1669	233.607	3.02729	1.59803	0.00321279	0.0264859
ENSMUSG00000032502	Stac	22.7972	11.3246	34.2698	3.02613	1.59748	0.0156773	0.0823021
ENSMUSG00000044345	Marveld1	101.872	50.6375	153.106	3.02357	1.59626	0.00408544	0.0315282
ENSMUSG00000020349	Ppp2ca	2980.22	1481.72	4478.72	3.02266	1.59582	0.00017933	0.00297975
ENSMUSG00000032528	Vipr1	76.715	38.168	115.262	3.01986	1.59448	0.00719652	0.0477169
ENSMUSG00000034675	Dbn1	708.967	352.88	1065.05	3.01817	1.59368	0.000456945	0.00622806
ENSMUSG00000037339	Fam53a	197.629	98.4883	296.77	3.01325	1.59132	0.00175845	0.017022
ENSMUSG00000026739	Bmi1	370.6	184.716	556.483	3.01264	1.59103	0.000770204	0.00941805
ENSMUSG00000066721	Zfp575	33.6465	16.7772	50.5157	3.01096	1.59023	0.0153038	0.0810464
ENSMUSG00000024896	Minpp1	618.168	308.409	927.927	3.00875	1.58917	0.000305824	0.00453383
ENSMUSG00000045767	B230219D22Rik	2228.79	1112.28	3345.29	3.00759	1.58861	0.000104808	0.00195158
ENSMUSG00000071253	Slc25a16	516.764	257.954	775.575	3.00664	1.58815	0.00046553	0.00631511
ENSMUSG00000032925	Itgbl1	231.508	115.615	347.401	3.00482	1.58728	0.0012554	0.0132816
ENSMUSG00000019796	Lrp11	961.555	480.37	1442.74	3.0034	1.58659	0.000234829	0.00369006
ENSMUSG00000030401	Rtn2	345.356	172.695	518.016	2.99959	1.58477	0.00170138	0.0165968
ENSMUSG00000032431	Crtap	27.2227	13.6128	40.8326	2.99957	1.58476	0.00853206	0.0538632
ENSMUSG00000057060	Slc35f3	153.637	76.8389	230.436	2.99895	1.58446	0.00227407	0.0205793
ENSMUSG00000026347	Tmem163	114.034	57.0399	171.028	2.9984	1.58419	0.00482691	0.0355713
ENSMUSG00000032562	Gnai2	495.384	247.891	742.877	2.99679	1.58342	0.000631091	0.00803527
ENSMUSG00000014349	Ube2z	669.318	335.578	1003.06	2.98904	1.57968	0.000361861	0.00520352
ENSMUSG00000046321	Hs3st2	191.893	96.2194	287.567	2.98866	1.5795	0.00244831	0.0217591
ENSMUSG00000031983	2310022B05Rik	341.445	171.253	511.637	2.98761	1.57899	0.00125348	0.0132714
ENSMUSG00000023473	Celsr3	337.743	169.423	506.063	2.98697	1.57868	0.00105292	0.0117385
ENSMUSG00000031150	Ccdc120	100.511	50.4367	150.586	2.98564	1.57804	0.00393128	0.0307633
ENSMUSG00000037266	Rsrp1	3758.97	1886.71	5631.23	2.98468	1.57758	0.000158562	0.00269595
ENSMUSG00000045252	Zfp574	205.599	103.245	307.954	2.98274	1.57664	0.00278349	0.0240116
ENSMUSG00000043557	Mdga1	243.143	122.118	364.168	2.98209	1.57632	0.00289191	0.0246905
ENSMUSG00000020988	L2hgdh	303.25	152.325	454.176	2.98162	1.5761	0.000901343	0.0104862
ENSMUSG00000028020	Glrb	1331	669.148	1992.84	2.97818	1.57443	0.00017738	0.00295442
ENSMUSG00000027803	Wwtr1	280.231	140.924	419.538	2.97705	1.57389	0.00103949	0.0116422
ENSMUSG00000042167	Papd4	140.303	70.5956	210.011	2.97484	1.57281	0.00278111	0.0240102
ENSMUSG00000005045	Chd5	623.187	313.571	932.802	2.97477	1.57278	0.000554121	0.0072343
ENSMUSG00000033819	Ppp1r16a	234.3	117.933	350.666	2.97343	1.57213	0.0029998	0.0253078
ENSMUSG00000030725	Lipt2	75.9085	38.2365	113.581	2.97048	1.57069	0.00659868	0.0449325
ENSMUSG00000024112	Cacna1h	90.0549	45.3706	134.739	2.96975	1.57034	0.00659132	0.0449044
ENSMUSG00000020015	Cdk17	2438.75	1229.78	3647.73	2.96617	1.5686	0.000137798	0.0024353
ENSMUSG00000032583	Mon1a	103.049	51.9712	154.126	2.96561	1.56833	0.00464133	0.0345553
ENSMUSG00000034164	Emid1	71.2327	35.9656	106.5	2.96116	1.56616	0.00584226	0.0411119
ENSMUSG00000025226	Fbxl15	36.6404	18.5133	54.7674	2.95827	1.56475	0.0145671	0.0781882
ENSMUSG00000025134	Alyref	316.56	159.975	473.145	2.95763	1.56444	0.00101976	0.0115261
ENSMUSG00000010936	Vac14	157.202	79.5755	234.828	2.95101	1.56121	0.00315639	0.0262076
ENSMUSG00000055723	Rras2	543.181	275.088	811.274	2.94915	1.5603	0.000486013	0.00651661
ENSMUSG00000031706	Rfx1	98.0671	49.6837	146.45	2.94766	1.55957	0.00537082	0.0385561
ENSMUSG00000049940	Pgrmc2	342.77	173.685	511.855	2.94703	1.55926	0.00119995	0.0129013
ENSMUSG00000033088	Triobp	139.984	70.9339	209.035	2.9469	1.5592	0.00304326	0.0255741
ENSMUSG00000045790	Ccdc149	436.026	221.112	650.94	2.94394	1.55775	0.00100385	0.0113833
ENSMUSG00000046922	Gpr6	395.235	200.578	589.891	2.94096	1.55629	0.000744206	0.00917281
ENSMUSG00000026791	Slc2a8	122.634	62.2519	183.016	2.93992	1.55578	0.00427031	0.0325391
ENSMUSG00000071847	Apcdd1	154.991	78.7179	231.265	2.9379	1.55478	0.00246122	0.0218599
ENSMUSG00000039910	Cited2	244.969	124.417	365.522	2.93789	1.55478	0.00165082	0.0162866
ENSMUSG00000064181	Rab3ip	360.173	182.966	537.38	2.93704	1.55437	0.00122428	0.0130618
ENSMUSG00000033722	BC034090	30.9943	15.7673	46.2213	2.93148	1.55163	0.0106648	0.0632016
ENSMUSG00000075502	Zbtbd6	15.5711	7.92588	23.2163	2.92918	1.5505	0.0199006	0.0964886
ENSMUSG00000025427	Rnf165	1596.19	812.628	2379.74	2.92845	1.55014	0.000153704	0.00263268
ENSMUSG00000032280	Tle3	291.322	148.347	434.297	2.92757	1.54971	0.0015798	0.0157884
ENSMUSG00000016940	Kctd2	292.272	148.873	435.67	2.92645	1.54915	0.00168917	0.016513
ENSMUSG00000000168	Dlat	1022.93	521.263	1524.59	2.9248	1.54834	0.000362493	0.00520723
ENSMUSG00000006931	Leprel4	26.6732	13.6014	39.7449	2.92211	1.54701	0.015502	0.0818282
ENSMUSG00000014932	Yes1	196.192	100.089	292.295	2.92034	1.54614	0.00189895	0.018055
ENSMUSG00000002504	Slc9a3r2	193.952	98.9503	288.954	2.9202	1.54607	0.00252025	0.0222702
ENSMUSG00000042804	Gpr153	51.0758	26.0605	76.0911	2.91978	1.54586	0.0156354	0.082207
ENSMUSG00000000627	Sema4f	345.539	176.38	514.697	2.9181	1.54503	0.00118719	0.0128437
ENSMUSG00000039117	Taf4a	136.076	69.4671	202.684	2.91771	1.54483	0.00344556	0.027908
ENSMUSG00000049339	Fam134a	801.146	408.997	1193.3	2.91762	1.54479	0.000475746	0.00642234
ENSMUSG00000017493	Igfbp4	106.174	54.2248	158.124	2.91608	1.54403	0.00619255	0.0428177
ENSMUSG00000044949	Ubtd2	160.759	82.1308	239.388	2.91472	1.54336	0.0034124	0.0276717
ENSMUSG00000022687	Boc	235.642	120.466	350.818	2.91218	1.5421	0.00199512	0.0186754
ENSMUSG00000040502	March9	72.6373	37.1386	108.136	2.91169	1.54186	0.00685235	0.046028
ENSMUSG00000024858	Adrbk1	559.319	286.12	832.517	2.90968	1.54086	0.000786537	0.00955886
ENSMUSG00000052301	Doc2a	61.2222	31.3243	91.1201	2.90893	1.54049	0.00889108	0.0554336
ENSMUSG00000030224	Strap	962.814	492.625	1433	2.90891	1.54048	0.000274241	0.0041503
ENSMUSG00000040365	Trim41	171.21	87.6049	254.816	2.9087	1.54037	0.00372937	0.0296196
ENSMUSG00000035027	Map2k2	266.724	136.513	396.934	2.90766	1.53986	0.00190417	0.0180909
ENSMUSG00000020477	Mrps24	115.706	59.2467	172.165	2.9059	1.53899	0.0051752	0.0375398
ENSMUSG00000036093	Arl5a	1362.77	697.847	2027.69	2.90563	1.53885	0.000197651	0.00323562
ENSMUSG00000021109	Hif1a	1681	860.908	2501.09	2.90518	1.53863	0.00013593	0.00240842
ENSMUSG00000027895	Kcnc4	343.137	175.796	510.478	2.90381	1.53795	0.00142603	0.0146624
ENSMUSG00000029817	Tra2a	458.208	235.074	681.342	2.89841	1.53526	0.000777724	0.00947664
ENSMUSG00000036087	Slain2	680.638	349.286	1011.99	2.89731	1.53472	0.000399544	0.00563458
ENSMUSG00000041774	Ydjc	76.2411	39.1303	113.352	2.89678	1.53445	0.0067583	0.0456835
ENSMUSG00000033214	Slitrk5	1164.5	598.058	1730.93	2.89426	1.53319	0.000160146	0.0027144
ENSMUSG00000013646	Sh3bp5l	411.593	211.424	611.762	2.89352	1.53283	0.00111024	0.0122013
ENSMUSG00000029348	Asphd2	468.614	240.789	696.439	2.89231	1.53222	0.00111772	0.012264
ENSMUSG00000018143	Mafk	71.668	36.8652	106.471	2.88811	1.53013	0.00701122	0.0468235
ENSMUSG00000025795	Rassf3	303.621	156.215	451.027	2.88722	1.52968	0.00122589	0.013069
ENSMUSG00000038991	Txndc5	419.14	215.754	622.525	2.88535	1.52875	0.00103832	0.0116411
ENSMUSG00000028051	Hcn3	95.9613	49.4107	142.512	2.88423	1.52819	0.00680983	0.0458592
ENSMUSG00000044496	2510039O18Rik	205.472	105.825	305.12	2.88325	1.5277	0.00324225	0.026634
ENSMUSG00000025940	Tmem70	450.978	232.284	669.672	2.88299	1.52757	0.000900778	0.0104862
ENSMUSG00000039662	Icmt	537.987	277.136	798.837	2.88247	1.52731	0.000619071	0.00790679
ENSMUSG00000020770	Unk	197.579	101.916	293.241	2.87727	1.5247	0.0028087	0.0241434
ENSMUSG00000054934	Kcnmb4	167.182	86.279	248.085	2.87538	1.52375	0.00322612	0.0265486
ENSMUSG00000094626	Cecr6	601.54	310.585	892.494	2.87359	1.52285	0.000589234	0.00759986
ENSMUSG00000037703	Lzts3	318.434	164.439	472.429	2.87297	1.52255	0.00163547	0.0161581
ENSMUSG00000055692	Tmem191c	384.566	198.667	570.465	2.87146	1.52179	0.00161083	0.0159828
ENSMUSG00000003500	Impdh1	356.11	183.986	528.233	2.87105	1.52158	0.00197201	0.0184839
ENSMUSG00000025575	Cant1	367.938	190.119	545.757	2.8706	1.52135	0.00223234	0.0202942
ENSMUSG00000036882	Arhgap33	627.118	324.367	929.869	2.86672	1.5194	0.00119105	0.0128553
ENSMUSG00000020427	Igfbp3	154.494	79.9293	229.058	2.86576	1.51892	0.00336656	0.0274603
ENSMUSG00000007617	Homer1	2640.12	1366.75	3913.5	2.86337	1.51772	0.000270792	0.004111
ENSMUSG00000004364	Cul3	1693.13	876.632	2509.62	2.8628	1.51743	0.000223528	0.00355317
ENSMUSG00000028700	Pomgnt1	424.31	219.711	628.909	2.86245	1.51725	0.00142241	0.014647
ENSMUSG00000026620	Mark1	995.04	515.249	1474.83	2.86237	1.51721	0.000415681	0.0057916
ENSMUSG00000064357	mt-Atp6	98.7992	51.1641	146.434	2.86206	1.51705	0.00580389	0.0409664
ENSMUSG00000038462	Uqcrfs1	873.672	452.568	1294.78	2.86095	1.5165	0.000309982	0.00458569
ENSMUSG00000022378	Fam49b	1915	993.472	2836.54	2.85518	1.51358	0.000272255	0.00412871
ENSMUSG00000072889	Nfxl1	208.352	108.144	308.56	2.85323	1.5126	0.0028201	0.0242099
ENSMUSG00000020937	Plcd3	128.222	66.5716	189.872	2.85215	1.51205	0.00613019	0.0424711
ENSMUSG00000042608	Stk40	283.928	147.419	420.438	2.85199	1.51197	0.00200152	0.0186975
ENSMUSG00000050248	Evc2	30.6807	15.93	45.4314	2.85195	1.51195	0.0150864	0.080201
ENSMUSG00000046182	Gsg1l	185.509	96.3279	274.69	2.85161	1.51178	0.00436714	0.0331316
ENSMUSG00000030319	Cand2	29.1377	15.1316	43.1438	2.85123	1.51159	0.0142227	0.0767847
ENSMUSG00000011158	Brf1	168.344	87.45	249.238	2.85007	1.511	0.00359744	0.0289023
ENSMUSG00000045503	Sys1	235.288	122.235	348.341	2.84977	1.51085	0.00312753	0.0260336
ENSMUSG00000024012	Mtch1	685.355	356.21	1014.5	2.84803	1.50997	0.000978391	0.0111767
ENSMUSG00000039952	Dag1	840.5	436.954	1244.05	2.84709	1.50949	0.000488608	0.00654508
ENSMUSG00000008090	Fgfrl1	49.7797	25.8849	73.6744	2.84623	1.50905	0.0118581	0.0677673
ENSMUSG00000033857	Engase	81.6134	42.4729	120.754	2.84308	1.50746	0.00663568	0.0451181
ENSMUSG00000031865	Dctn1	845.869	440.26	1251.48	2.84259	1.5072	0.00064628	0.00816297
ENSMUSG00000031503	Col4a2	253.253	131.85	374.657	2.84155	1.50668	0.00272598	0.0236518
ENSMUSG00000040490	Lrfn2	63.3461	33.0011	93.6911	2.83903	1.5054	0.00997332	0.0601404
ENSMUSG00000078440	Dohh	298.558	155.559	441.556	2.83852	1.50514	0.00333668	0.0272646
ENSMUSG00000057963	Itpk1	412.685	215.263	610.108	2.83425	1.50297	0.00103636	0.0116285
ENSMUSG00000024962	Vegfb	81.6341	42.583	120.685	2.83412	1.5029	0.00855717	0.053914
ENSMUSG00000032393	Dpp8	484.283	252.766	715.8	2.83187	1.50175	0.00125111	0.0132665
ENSMUSG00000048450	Msx1	37.5081	19.5875	55.4287	2.8298	1.5007	0.0122103	0.0689767
ENSMUSG00000020238	Ncln	422.134	220.465	623.803	2.82949	1.50054	0.0014393	0.0147746
ENSMUSG00000014859	E2f4	178.827	93.4632	264.191	2.82668	1.49911	0.00329948	0.0270083
ENSMUSG00000052911	Lamb2	48.1709	25.183	71.1588	2.82566	1.49859	0.0196816	0.0958279
ENSMUSG00000017715	Pgs1	303.369	158.66	448.078	2.82413	1.49781	0.00272211	0.023633
ENSMUSG00000000881	Dlg3	923.387	483.044	1363.73	2.8232	1.49733	0.000693832	0.00866729
ENSMUSG00000073062	Zxdb	182.746	95.5995	269.892	2.82315	1.49731	0.00368768	0.0293556
ENSMUSG00000012296	Tjap1	102.602	53.6881	151.515	2.82214	1.49679	0.00768802	0.0500676
ENSMUSG00000006169	Clint1	618.32	323.573	913.068	2.82184	1.49663	0.000761019	0.00932214
ENSMUSG00000025730	Rab40c	605.974	317.146	894.801	2.82142	1.49642	0.000645473	0.00816297
ENSMUSG00000020307	Cdc34	129.18	67.6314	190.729	2.82013	1.49576	0.00612755	0.0424711
ENSMUSG00000002897	Il17ra	97.6235	51.1243	144.123	2.81906	1.49522	0.00683104	0.0459071
ENSMUSG00000047777	Phf13	133.208	69.771	196.644	2.81842	1.49489	0.00451635	0.0339668
ENSMUSG00000073775	Kti12	64.0079	33.5368	94.479	2.81718	1.49425	0.00916139	0.0566456
ENSMUSG00000022817	Itgb5	173.164	90.7841	255.545	2.81486	1.49306	0.00447507	0.033711
ENSMUSG00000029147	Ppm1g	491.398	257.632	725.164	2.81472	1.49299	0.000850949	0.0100944
ENSMUSG00000035835	Lppr3	273.291	143.503	403.078	2.80884	1.48997	0.00362084	0.029021
ENSMUSG00000022983	Scaf4	258.358	135.687	381.028	2.80815	1.48962	0.00261346	0.0229189
ENSMUSG00000051495	Irf2bp2	763.027	400.926	1125.13	2.80632	1.48868	0.000466504	0.00631599
ENSMUSG00000002820	Atg4d	161.18	84.7002	237.66	2.8059	1.48846	0.00453947	0.0340853
ENSMUSG00000041263	Rusc1	709.607	372.92	1046.29	2.80568	1.48835	0.000833734	0.00995821
ENSMUSG00000020374	Rasgef1c	112.475	59.1162	165.834	2.80523	1.48812	0.00747455	0.0491149
ENSMUSG00000022895	Ets2	470.777	247.466	694.088	2.80478	1.48789	0.000968331	0.0111191
ENSMUSG00000068206	Pick1	297.082	156.182	437.981	2.8043	1.48764	0.00250512	0.0221506
ENSMUSG00000026211	Obsl1	101.307	53.2855	149.329	2.80244	1.48668	0.00970254	0.0590096
ENSMUSG00000035891	Cerk	344.511	181.228	507.794	2.80197	1.48644	0.00204491	0.0189879
ENSMUSG00000040957	Cables1	366.611	192.924	540.298	2.80057	1.48572	0.00150037	0.0152128
ENSMUSG00000038146	Notch3	69.7162	36.6883	102.744	2.80046	1.48566	0.00792484	0.0511305
ENSMUSG00000017713	Tha1	28.5971	15.0497	42.1445	2.80036	1.48561	0.0204751	0.098245
ENSMUSG00000026927	Sdccag3	773.199	407.202	1139.2	2.79762	1.4842	0.000767793	0.00939684
ENSMUSG00000006019	Dhx34	79.504	41.8802	117.128	2.79674	1.48375	0.011483	0.0663034
ENSMUSG00000018379	Srsf1	1530.39	806.415	2254.36	2.79553	1.48312	0.000313425	0.00461695
ENSMUSG00000039568	Ubald1	209.808	110.604	309.012	2.79386	1.48226	0.00358289	0.0288522
ENSMUSG00000070520	Ndnl2	322.517	170.1	474.933	2.79208	1.48134	0.00211454	0.0194524
ENSMUSG00000023087	Ccrn4l	514.593	271.547	757.64	2.79009	1.48031	0.000956622	0.0110277
ENSMUSG00000030499	Kctd15	48.1738	25.4315	70.9162	2.78852	1.4795	0.0113031	0.065622
ENSMUSG00000021495	Fam193b	236.929	125.092	348.766	2.78807	1.47927	0.00311178	0.0259475
ENSMUSG00000028893	Sesn2	113.428	59.9164	166.94	2.78621	1.47831	0.00676604	0.0456913
ENSMUSG00000000374	Trappc10	328.305	173.452	483.158	2.78555	1.47796	0.00218762	0.0199529
ENSMUSG00000019256	Ahr	262.753	138.824	386.681	2.78541	1.47789	0.00212702	0.0195413
ENSMUSG00000078670	Fam174b	349.166	184.525	513.807	2.78448	1.47741	0.0022532	0.020457
ENSMUSG00000041037	Irgq	1391.98	735.986	2047.98	2.78263	1.47645	0.000409941	0.00573463
ENSMUSG00000068798	Rap1a	473.725	250.547	696.903	2.78152	1.47587	0.0011281	0.0123487
ENSMUSG00000025409	Mbd6	68.493	36.2292	100.757	2.7811	1.47565	0.00898405	0.0558378
ENSMUSG00000011832	Evi5l	470.087	248.755	691.419	2.77952	1.47484	0.00150789	0.0152558
ENSMUSG00000074637	Sox2	125.681	66.5274	184.835	2.77832	1.47421	0.00516395	0.0374778
ENSMUSG00000047714	Ppp1r2	425.585	225.3	625.869	2.77793	1.47401	0.00132075	0.0137944
ENSMUSG00000034653	Ythdc2	760.095	402.47	1117.72	2.77715	1.4736	0.000670906	0.00843399
ENSMUSG00000020283	Pex13	435.382	230.538	640.226	2.7771	1.47358	0.00117856	0.0127801
ENSMUSG00000000957	Mmp14	131.803	69.8335	193.773	2.77479	1.47238	0.00526233	0.0379933
ENSMUSG00000002908	Kcnn1	113.392	60.1217	166.662	2.77208	1.47097	0.00747145	0.0491149
ENSMUSG00000020231	Dip2a	425.438	225.671	625.205	2.77043	1.47011	0.00160888	0.015975
ENSMUSG00000051238	Swsap1	83.7208	44.4237	123.018	2.76919	1.46946	0.00778453	0.0505303
ENSMUSG00000001065	Zfp276	211.234	112.087	310.381	2.76911	1.46942	0.00321628	0.0264959
ENSMUSG00000064105	Cnnm2	146.01	77.485	214.536	2.76874	1.46923	0.00468261	0.0347654
ENSMUSG00000038271	Iffo1	263.702	139.942	387.461	2.76873	1.46923	0.00252928	0.0223067
ENSMUSG00000001632	Brpf1	358.494	190.279	526.709	2.76809	1.46889	0.00157201	0.0157439
ENSMUSG00000030282	Cmas	654.883	347.756	962.01	2.76633	1.46798	0.00110417	0.012173
ENSMUSG00000045817	Zfp36l2	124.782	66.3241	183.24	2.76279	1.46613	0.005374	0.038559
ENSMUSG00000001847	Rac1	1654.44	880.746	2428.13	2.7569	1.46305	0.000399299	0.00563458
ENSMUSG00000067629	Syngap1	102.227	54.4251	150.028	2.75661	1.46289	0.0138495	0.0754742
ENSMUSG00000021993	Mipep	187.824	100.02	275.628	2.75571	1.46243	0.005816	0.0409894
ENSMUSG00000027674	Pex5l	301.106	160.413	441.8	2.75415	1.46161	0.0019332	0.0182557
ENSMUSG00000016262	Sertad4	384.67	204.95	564.391	2.7538	1.46142	0.00148468	0.0150979
ENSMUSG00000021262	Evl	208.874	111.34	306.408	2.75199	1.46048	0.00403201	0.0313143
ENSMUSG00000020794	Ube2g1	1046.29	557.735	1534.84	2.75192	1.46044	0.000512375	0.00679141
ENSMUSG00000031584	Gsr	336.176	179.264	493.089	2.75063	1.45976	0.00174792	0.0169707
ENSMUSG00000040972	Igsf21	204.608	109.145	300.071	2.74929	1.45906	0.00571803	0.0405044
ENSMUSG00000020308	Tpgs1	164.529	87.801	241.258	2.74778	1.45827	0.00759312	0.0495891
ENSMUSG00000029050	Ski	1366.09	729.481	2002.7	2.74538	1.45701	0.000424692	0.00588762
ENSMUSG00000050912	Tmem123	81.8015	43.6878	119.915	2.74482	1.45671	0.00777255	0.0504762
ENSMUSG00000041718	Alg13	141.393	75.5289	207.258	2.74409	1.45633	0.00583421	0.041076
ENSMUSG00000024588	Fech	984.446	525.984	1442.91	2.74325	1.45589	0.000596047	0.00766638
ENSMUSG00000016946	Kctd5	782.648	418.238	1147.06	2.7426	1.45554	0.000689989	0.0086426
ENSMUSG00000027715	Ccna2	132.435	70.7992	194.07	2.74114	1.45477	0.00543831	0.0388999
ENSMUSG00000001366	Fbxo9	579.814	310.106	849.522	2.73946	1.45389	0.00139008	0.0143994
ENSMUSG00000002803	Btbd6	215.786	115.418	316.153	2.7392	1.45375	0.00620096	0.042852
ENSMUSG00000001211	Agpat3	1202.7	643.532	1761.88	2.73783	1.45303	0.000750182	0.00923009
ENSMUSG00000062563	Cys1	77.5624	41.5163	113.608	2.73648	1.45232	0.0108153	0.0638755
ENSMUSG00000033170	Card10	22.9854	12.3055	33.6654	2.7358	1.45196	0.0195187	0.0952351
ENSMUSG00000009079	Ewsr1	1278.01	684.558	1871.46	2.73381	1.45092	0.000412521	0.00575912
ENSMUSG00000028962	Slc4a2	55.7828	29.9001	81.6656	2.73129	1.44958	0.0207961	0.0990505
ENSMUSG00000047945	Marcksl1	689.164	369.435	1008.89	2.7309	1.44938	0.0019635	0.0184394
ENSMUSG00000003581	Rnf215	200.941	107.725	294.157	2.73062	1.44923	0.00437865	0.0331827
ENSMUSG00000091337	Eid1	1065.87	571.453	1560.28	2.73038	1.4491	0.000822425	0.00988497
ENSMUSG00000054843	Atrnl1	596.883	320.246	873.519	2.72765	1.44766	0.00131035	0.0137167
ENSMUSG00000050148	Ubqln2	446.411	239.647	653.176	2.72557	1.44656	0.00182981	0.0175022
ENSMUSG00000000568	Hnrnpd	465.77	250.148	681.391	2.72395	1.4457	0.00158384	0.0158168
ENSMUSG00000026821	Ralgds	908.317	487.826	1328.81	2.72394	1.4457	0.00079867	0.00965055
ENSMUSG00000047434	Xxylt1	228.042	122.475	333.608	2.72388	1.44567	0.0044981	0.0338478
ENSMUSG00000026421	Csrp1	287.233	154.289	420.176	2.7233	1.44535	0.00278473	0.0240116
ENSMUSG00000024772	Ehd1	167.351	89.8971	244.804	2.72316	1.44528	0.00622223	0.0429587
ENSMUSG00000031934	Panx1	168.706	90.6488	246.763	2.72218	1.44476	0.00484704	0.0356622
ENSMUSG00000039357	Fut11	330.112	177.378	482.847	2.72213	1.44474	0.00238071	0.0213909
ENSMUSG00000047466	8030462N17Rik	85.9271	46.1768	125.677	2.72166	1.44449	0.0121519	0.0688387
ENSMUSG00000021264	Yy1	218.335	117.428	319.242	2.71862	1.44287	0.00414666	0.0318943
ENSMUSG00000013663	Pten	4325.4	2326.43	6324.36	2.71848	1.4428	0.000646409	0.00816297
ENSMUSG00000021669	Col4a3bp	374.014	201.346	546.681	2.71513	1.44102	0.0015567	0.0156224
ENSMUSG00000074766	Ism1	139.056	74.9134	203.199	2.71245	1.4396	0.00714091	0.0474614
ENSMUSG00000043733	Ptpn11	617.19	332.622	901.758	2.71106	1.43886	0.00107755	0.0119555
ENSMUSG00000039208	Metrnl	36.7462	19.813	53.6794	2.7093	1.43792	0.013956	0.075757
ENSMUSG00000074807	Gm10762	25.1521	13.5693	36.7349	2.70721	1.43681	0.0194718	0.0950731
ENSMUSG00000027296	Itpka	358.754	193.59	523.917	2.70633	1.43634	0.00279281	0.0240365
ENSMUSG00000039577	Nphp4	82.0419	44.274	119.81	2.7061	1.43622	0.0107748	0.0637069
ENSMUSG00000034575	Papd7	343.188	185.388	500.989	2.70238	1.43423	0.00204025	0.0189573
ENSMUSG00000079003	Samd1	62.2654	33.639	90.8918	2.70198	1.43402	0.0143991	0.0775265
ENSMUSG00000021303	Gng4	919.339	496.701	1341.98	2.70178	1.43391	0.00110194	0.0121581
ENSMUSG00000043702	Pde12	330.36	178.642	482.078	2.69857	1.4322	0.00239772	0.0214882
ENSMUSG00000006435	Neurl1a	425.895	230.325	621.464	2.69821	1.432	0.00295613	0.0250552
ENSMUSG00000066877	Nck2	381.89	206.645	557.136	2.69611	1.43088	0.00162315	0.0160821
ENSMUSG00000001627	Ifrd1	581.18	314.497	847.863	2.69593	1.43078	0.00100507	0.0113878
ENSMUSG00000053716	Dusp7	608.336	329.473	887.198	2.69278	1.4291	0.00120479	0.0129334
ENSMUSG00000091896	Ube2d2a	400.423	216.877	583.969	2.69263	1.42902	0.00196893	0.0184676
ENSMUSG00000046997	Spsb4	38.9564	21.1089	56.8039	2.69099	1.42814	0.0161299	0.0840466
ENSMUSG00000037316	Bag4	753.141	408.128	1098.15	2.69071	1.42799	0.00079837	0.00965055
ENSMUSG00000020029	Nudt4	2361.86	1279.95	3443.77	2.69056	1.4279	0.000709877	0.00884386
ENSMUSG00000005148	Klf5	149.461	81.0215	217.901	2.68942	1.4273	0.00532907	0.0383883
ENSMUSG00000038324	Trpc4ap	1029.41	558.1	1500.73	2.689	1.42707	0.000905004	0.01052
ENSMUSG00000047187	Rab2a	1821.5	987.814	2655.19	2.68794	1.4265	0.000635225	0.00805837
ENSMUSG00000040731	Eif4h	1557.26	844.591	2269.92	2.6876	1.42632	0.000873434	0.0102647
ENSMUSG00000022416	Cacna1i	331.456	179.783	483.13	2.6873	1.42616	0.00391927	0.0307064
ENSMUSG00000015766	Eps8	333.164	180.716	485.612	2.68716	1.42608	0.0032968	0.0270023
ENSMUSG00000026771	Spopl	358.089	194.249	521.93	2.68692	1.42595	0.00252652	0.0223067
ENSMUSG00000020785	Camkk1	442.73	240.191	645.27	2.68649	1.42572	0.00240449	0.0215056
ENSMUSG00000044933	Sstr3	89.7172	48.6832	130.751	2.68575	1.42533	0.0109256	0.06419
ENSMUSG00000079020	Slc45a4	536.714	291.593	781.836	2.68126	1.42291	0.00175085	0.0169722
ENSMUSG00000032394	Igdcc3	38.5511	20.9572	56.145	2.67903	1.42171	0.015299	0.0810464
ENSMUSG00000046985	Tapt1	697.987	379.82	1016.16	2.67536	1.41973	0.00101243	0.0114525
ENSMUSG00000032492	Pth1r	25.4581	13.8543	37.062	2.67512	1.4196	0.020119	0.0970057
ENSMUSG00000020482	Ccdc117	190.675	103.835	277.516	2.67265	1.41827	0.00465461	0.0345946
ENSMUSG00000026443	Lrrn2	519.328	282.826	755.831	2.67243	1.41815	0.00225547	0.0204643
ENSMUSG00000004187	Kifc2	985.162	536.899	1433.43	2.66982	1.41674	0.00129443	0.0135824
ENSMUSG00000048707	Tprn	48.869	26.6404	71.0977	2.6688	1.41619	0.0187071	0.092642
ENSMUSG00000054874	Pcnxl3	264.047	143.995	384.099	2.66745	1.41546	0.00407183	0.0314582
ENSMUSG00000037503	Fam168b	2265.28	1235.46	3295.09	2.66708	1.41526	0.000865124	0.0102016
ENSMUSG00000026883	Dab2ip	422.922	230.773	615.07	2.66526	1.41428	0.00226911	0.0205612
ENSMUSG00000050822	Slc29a4	382.247	208.623	555.871	2.66447	1.41385	0.00391233	0.0306694
ENSMUSG00000016349	Eef1a2	249.205	136.097	362.313	2.66216	1.4126	0.00484122	0.0356571
ENSMUSG00000038264	Sema7a	121.052	66.1195	175.985	2.66163	1.41231	0.0120144	0.0682306
ENSMUSG00000024970	AI846148	175.498	95.8927	255.103	2.6603	1.41159	0.00635517	0.0437461
ENSMUSG00000071604	Fam189a2	97.0792	53.0799	141.078	2.65785	1.41026	0.0112343	0.06535
ENSMUSG00000050132	Sarm1	310.889	170.062	451.716	2.65618	1.40935	0.0038073	0.0300666
ENSMUSG00000031527	Eri1	300.899	164.634	437.164	2.65536	1.40891	0.00382559	0.0301583
ENSMUSG00000055239	Kcmf1	577.616	316.052	839.18	2.6552	1.40882	0.00145912	0.0149034
ENSMUSG00000030120	Mlf2	1000.58	547.808	1453.35	2.65303	1.40764	0.00153595	0.0154384
ENSMUSG00000032846	Zswim6	413.088	226.231	599.945	2.65191	1.40703	0.00173982	0.0169361
ENSMUSG00000079834	Tmlhe	96.6252	52.9213	140.329	2.65166	1.40689	0.00771392	0.0501657
ENSMUSG00000003352	Cacnb3	407.867	223.391	592.342	2.65159	1.40686	0.00420489	0.0321819
ENSMUSG00000030505	Prmt3	290.053	158.909	421.197	2.65055	1.40629	0.00423263	0.0323407
ENSMUSG00000063511	Snrnp70	240.402	131.747	349.056	2.64944	1.40569	0.00501193	0.0365996
ENSMUSG00000045216	Hs6st1	833.301	457.005	1209.6	2.64679	1.40424	0.00117262	0.0127456
ENSMUSG00000059895	Ptp4a3	371.233	203.728	538.738	2.6444	1.40294	0.00366287	0.0292419
ENSMUSG00000027509	Rae1	462.93	254.095	671.764	2.64376	1.40259	0.00208267	0.0192484
ENSMUSG00000052429	Prmt1	259.104	142.323	375.884	2.64105	1.40111	0.00536156	0.0385096
ENSMUSG00000095567	Noc2l	223.71	122.887	324.533	2.6409	1.40103	0.00679569	0.0458025
ENSMUSG00000079598	Clec2l	408.196	224.277	592.116	2.64012	1.4006	0.00302204	0.0254265
ENSMUSG00000029265	Dr1	648.359	356.255	940.463	2.63986	1.40046	0.00166449	0.016375
ENSMUSG00000021067	Sav1	82.863	45.5762	120.15	2.63624	1.39848	0.00980308	0.0593432
ENSMUSG00000031828	Klhl36	39.5661	21.7641	57.3681	2.6359	1.3983	0.0179817	0.0903376
ENSMUSG00000053080	2700081O15Rik	218.534	120.293	316.775	2.63335	1.3969	0.00535183	0.0384846
ENSMUSG00000029344	Tpst2	277.986	153.023	402.95	2.63327	1.39685	0.00393317	0.0307633
ENSMUSG00000028654	Mycl	366.035	201.5	530.571	2.63311	1.39677	0.00315936	0.0262167
ENSMUSG00000041096	Tspyl2	348.821	192.025	505.617	2.63307	1.39675	0.00324976	0.0266671
ENSMUSG00000022489	Pde1b	271.802	149.634	393.97	2.63289	1.39665	0.00479469	0.0353895
ENSMUSG00000092035	Peg10	47.6937	26.2598	69.1276	2.63245	1.39641	0.0209133	0.0993866
ENSMUSG00000028277	Ube2j1	1065.53	587.31	1543.76	2.62852	1.39425	0.000989551	0.0112487
ENSMUSG00000039546	Ajap1	383.785	211.578	555.992	2.62784	1.39388	0.0026472	0.0231126
ENSMUSG00000029547	Ints1	273.722	150.953	396.492	2.6266	1.3932	0.00539151	0.0386647
ENSMUSG00000063765	Chadl	56.1916	30.9904	81.3929	2.6264	1.39308	0.0175513	0.0889801
ENSMUSG00000030403	Vasp	43.1468	23.8121	62.4815	2.62395	1.39174	0.0197818	0.0961464
ENSMUSG00000040125	Gpr26	1967.76	1086.17	2849.35	2.6233	1.39138	0.000710857	0.00884813
ENSMUSG00000048142	Nat8l	938.086	518.142	1358.03	2.62096	1.39009	0.00117722	0.0127756
ENSMUSG00000015363	Trabd	162.894	89.9769	235.81	2.62079	1.39	0.00803823	0.051646
ENSMUSG00000025702	March8	659.675	364.484	954.867	2.61978	1.38944	0.00190702	0.0180909
ENSMUSG00000004677	Myo9b	483.733	267.505	699.961	2.61663	1.38771	0.00252832	0.0223067
ENSMUSG00000022105	Rb1	616.543	340.997	892.089	2.61612	1.38743	0.00150902	0.015256
ENSMUSG00000018547	Pip4k2b	151.591	83.8549	219.326	2.61555	1.38711	0.00910311	0.0563508
ENSMUSG00000020538	Srebf1	162.254	89.778	234.73	2.61456	1.38657	0.00897513	0.0558073
ENSMUSG00000037098	Rab11fip3	991.678	549.308	1434.05	2.61064	1.38441	0.00097937	0.0111775
ENSMUSG00000017929	B4galt5	396.745	219.816	573.674	2.60979	1.38393	0.00275764	0.0238818
ENSMUSG00000029458	Brap	407.124	225.573	588.675	2.60969	1.38388	0.00241181	0.0215173
ENSMUSG00000069814	E130309D14Rik	247.487	137.153	357.822	2.60892	1.38345	0.00577796	0.0408249
ENSMUSG00000048720	Tbc1d12	238.342	132.09	344.594	2.60879	1.38338	0.00545168	0.0389754
ENSMUSG00000074575	Kcng1	273.463	151.575	395.35	2.60828	1.3831	0.00473271	0.035025
ENSMUSG00000022553	Maf1	646.409	358.372	934.445	2.60747	1.38265	0.00191223	0.0181193
ENSMUSG00000046318	Ccbe1	139.595	77.4033	201.787	2.60696	1.38237	0.00861586	0.0542042
ENSMUSG00000022463	Srebf2	431.193	239.299	623.088	2.60381	1.38062	0.0025716	0.0226022
ENSMUSG00000019433	Gipc1	282.171	156.753	407.588	2.60018	1.37861	0.00504776	0.0367883
ENSMUSG00000029674	Limk1	108.712	60.4574	156.967	2.59632	1.37647	0.00891204	0.0554933
ENSMUSG00000032251	Irak1bp1	236.75	131.687	341.813	2.59564	1.37609	0.00521022	0.0377351
ENSMUSG00000052144	Ppp4r2	345.113	192.14	498.086	2.5923	1.37423	0.00364154	0.0291532
ENSMUSG00000075470	Alg10b	225.912	125.814	326.01	2.5912	1.37362	0.00794893	0.051223
ENSMUSG00000038696	Mapkap1	586.799	326.99	846.607	2.58909	1.37245	0.00202125	0.0188298
ENSMUSG00000025608	Podxl	114.713	63.935	165.492	2.58844	1.37208	0.00976372	0.0592104
ENSMUSG00000024914	Drap1	80.6743	45.0203	116.328	2.5839	1.36955	0.0159427	0.0834124
ENSMUSG00000001017	Chtop	1020.45	569.531	1471.36	2.58346	1.36931	0.00107404	0.0119261
ENSMUSG00000018509	Cenpv	129.649	72.3657	186.932	2.58316	1.36914	0.00929037	0.0572911
ENSMUSG00000035277	Arx	180.917	100.994	260.841	2.58275	1.36891	0.00598839	0.0419278
ENSMUSG00000025234	Arih1	1271.44	709.966	1832.92	2.5817	1.36832	0.000788067	0.00956653
ENSMUSG00000023192	Grm2	285.438	159.413	411.463	2.58112	1.368	0.00651596	0.0446098
ENSMUSG00000019188	H13	419.108	234.1	604.117	2.58059	1.3677	0.00242431	0.0216132
ENSMUSG00000030134	Rasgef1a	639.889	357.483	922.295	2.57997	1.36735	0.00167487	0.0164189
ENSMUSG00000039086	Ss18l1	668.436	373.461	963.412	2.57968	1.36719	0.00161663	0.016029
ENSMUSG00000018849	Wwc1	554.261	309.816	798.705	2.578	1.36625	0.00276943	0.0239431
ENSMUSG00000005958	Ephb3	398.438	222.718	574.158	2.57795	1.36623	0.00352745	0.0284717
ENSMUSG00000034570	Inpp5j	308.546	172.481	444.611	2.57774	1.36611	0.00412034	0.0317623
ENSMUSG00000002984	Tomm40	209.417	117.072	301.763	2.57759	1.36602	0.0042674	0.0325391
ENSMUSG00000018001	Cyth3	1030.16	576.492	1483.83	2.5739	1.36395	0.00104416	0.0116689
ENSMUSG00000024392	Bag6	290.717	162.833	418.602	2.57074	1.36219	0.00653677	0.0446642
ENSMUSG00000028680	Plk3	121.816	68.249	175.384	2.56976	1.36164	0.0110581	0.0646501
ENSMUSG00000039556	Ppp1r3f	158.29	88.7293	227.85	2.56792	1.3606	0.0111324	0.064968
ENSMUSG00000022656	Pvrl3	2418.74	1356.14	3481.35	2.56711	1.36014	0.000840189	0.0100009
ENSMUSG00000057069	Ero1lb	310.303	174.015	446.591	2.5664	1.35975	0.00409918	0.0316167
ENSMUSG00000035184	Fam124a	730.481	409.8	1051.16	2.56506	1.35899	0.00155763	0.0156224
ENSMUSG00000022426	Josd1	800.549	449.109	1151.99	2.56505	1.35899	0.00157445	0.015757
ENSMUSG00000037341	Slc9a7	104.787	58.8371	150.737	2.56193	1.35723	0.0157498	0.0824918
ENSMUSG00000036046	5031439G07Rik	1504.06	844.927	2163.2	2.56022	1.35627	0.00124258	0.0131962
ENSMUSG00000045034	Ankrd34b	67.7041	38.0498	97.3585	2.55871	1.35542	0.0176175	0.0891855
ENSMUSG00000020978	Klhdc2	1001.6	563.059	1440.14	2.55771	1.35485	0.00127702	0.0134487
ENSMUSG00000059288	Cdyl	83.4113	46.8939	119.929	2.55745	1.35471	0.0145997	0.0782729
ENSMUSG00000043019	Edem3	821.362	461.788	1180.94	2.55731	1.35463	0.00162607	0.0160996
ENSMUSG00000037103	Dcaf15	121.008	68.0605	173.955	2.55589	1.35382	0.0157349	0.0824844
ENSMUSG00000048218	Amigo2	94.1101	52.9329	135.287	2.55583	1.35379	0.0169219	0.086579
ENSMUSG00000049327	Setd8	295.71	166.358	425.062	2.5551	1.35338	0.00374821	0.0297182
ENSMUSG00000050390	C77080	109.078	61.3665	156.79	2.55498	1.35331	0.0147182	0.0788167
ENSMUSG00000031870	Pgr	243.918	137.259	350.578	2.55415	1.35284	0.00532731	0.0383883
ENSMUSG00000033545	Znrf1	606.507	341.404	871.611	2.55302	1.3522	0.00240816	0.0215056
ENSMUSG00000021745	Ptprg	1192.81	671.446	1714.17	2.55296	1.35217	0.00110695	0.0121747
ENSMUSG00000032297	Celf6	129.562	72.9376	186.187	2.55268	1.35201	0.00833432	0.0529732
ENSMUSG00000021061	Sptb	407.457	229.433	585.48	2.55186	1.35155	0.00462814	0.0345086
ENSMUSG00000033316	Galnt9	563.166	317.138	809.194	2.55155	1.35137	0.00367236	0.0292673
ENSMUSG00000035392	Dennd1a	393.303	221.544	565.061	2.55056	1.35081	0.00420227	0.0321819
ENSMUSG00000020888	Dvl2	122.89	69.2252	176.554	2.55043	1.35074	0.00890083	0.0554694
ENSMUSG00000003344	Btbd2	390.233	219.861	560.606	2.54982	1.3504	0.00429993	0.032711
ENSMUSG00000036985	Zdhhc9	424.441	239.252	609.629	2.54807	1.3494	0.00265332	0.0231516
ENSMUSG00000029166	Mapre3	283.436	159.817	407.054	2.547	1.3488	0.00726089	0.0479378
ENSMUSG00000020671	Rab10	1582.21	893.211	2271.2	2.54274	1.34638	0.00119474	0.0128554
ENSMUSG00000017776	Crk	2309.48	1304.24	3314.73	2.54151	1.34569	0.000984707	0.0112028
ENSMUSG00000066652	Lefty2	95.349	53.8499	136.848	2.54129	1.34556	0.01874	0.0927717
ENSMUSG00000027466	Rbck1	336.765	190.241	483.288	2.54039	1.34505	0.00559707	0.0397896
ENSMUSG00000001034	Mapk7	208.712	118	299.424	2.5375	1.34341	0.00841399	0.0532963
ENSMUSG00000008035	Mid1ip1	234.104	132.363	335.845	2.5373	1.3433	0.00620369	0.042852
ENSMUSG00000026737	Pip4k2a	756.822	427.97	1085.67	2.5368	1.34301	0.00174439	0.0169687
ENSMUSG00000004936	Map2k1	766.41	433.57	1099.25	2.53534	1.34218	0.0026013	0.0228404
ENSMUSG00000023909	Paqr4	290.311	164.258	416.363	2.53482	1.34188	0.00753466	0.0493875
ENSMUSG00000046410	Kcnk6	80.1316	45.3674	114.896	2.53256	1.3406	0.0156196	0.0821553
ENSMUSG00000024098	Twsg1	403.475	228.677	578.273	2.52878	1.33844	0.00318015	0.0262972
ENSMUSG00000089832	Shkbp1	65.3698	37.0606	93.6789	2.52772	1.33784	0.0189085	0.0934061
ENSMUSG00000025578	Cbx8	71.6867	40.6741	102.699	2.52493	1.33625	0.015779	0.0825873
ENSMUSG00000048232	Fbxo10	404.349	229.616	579.081	2.52195	1.33454	0.00447	0.0336912
ENSMUSG00000006476	Nsmf	1833.82	1041.57	2626.08	2.52127	1.33415	0.00257246	0.0226022
ENSMUSG00000005566	Trim28	845.552	480.347	1210.76	2.52059	1.33376	0.00236759	0.0212869
ENSMUSG00000024660	Incenp	89.3664	50.7867	127.946	2.51929	1.33302	0.0182468	0.0912404
ENSMUSG00000032570	Atp2c1	2218.23	1261.13	3175.33	2.51785	1.33219	0.00129341	0.0135824
ENSMUSG00000029875	Ccdc184	455.159	258.776	651.541	2.51778	1.33215	0.00444416	0.0335875
ENSMUSG00000048899	Rimkla	230.388	131.024	329.752	2.51673	1.33155	0.00757508	0.0495408
ENSMUSG00000029592	Usp30	256.571	145.957	367.185	2.51571	1.33097	0.00883179	0.0551382
ENSMUSG00000026646	Suv39h2	94.7867	53.9344	135.639	2.51489	1.3305	0.0125429	0.0703122
ENSMUSG00000022752	Tomm70a	1682.32	958.114	2406.53	2.51174	1.32869	0.00144129	0.0147746
ENSMUSG00000025422	Agap2	117.531	66.9535	168.108	2.51081	1.32815	0.0204542	0.0982009
ENSMUSG00000042763	Maneal	444.298	253.108	635.488	2.51074	1.32811	0.0038276	0.0301583
ENSMUSG00000066900	Suds3	191.035	108.829	273.24	2.51073	1.32811	0.0113025	0.065622
ENSMUSG00000004567	Mcoln1	223.307	127.251	319.363	2.50971	1.32752	0.00972603	0.0591007
ENSMUSG00000047037	Nipa1	369.384	210.506	528.261	2.50948	1.32739	0.00414361	0.0318886
ENSMUSG00000063049	Ing2	273.114	155.652	390.576	2.5093	1.32728	0.00635384	0.0437461
ENSMUSG00000003934	Efnb3	199.495	113.735	285.255	2.50805	1.32657	0.0111271	0.064968
ENSMUSG00000034317	Trim59	151.809	86.563	217.054	2.50747	1.32623	0.00975718	0.0592104
ENSMUSG00000037119	D15Ertd621e	1196.11	682.131	1710.09	2.50697	1.32595	0.00148082	0.015073
ENSMUSG00000047485	Klhl34	332.26	189.525	474.994	2.50623	1.32552	0.00521866	0.0377535
ENSMUSG00000044716	Dok7	56.3503	32.1481	80.5525	2.50567	1.32519	0.0207939	0.0990505
ENSMUSG00000005774	Rfx5	183.937	105.03	262.843	2.50254	1.32339	0.00916295	0.0566456
ENSMUSG00000008429	Herpud2	625.29	357.105	893.474	2.50199	1.32308	0.002226	0.020263
ENSMUSG00000027822	Slc33a1	429.257	245.287	613.227	2.50004	1.32195	0.00406876	0.0314582
ENSMUSG00000032531	Amotl2	113.573	64.9102	162.235	2.49938	1.32157	0.0141981	0.0767117
ENSMUSG00000024712	Rfk	597.656	341.871	853.441	2.49638	1.31984	0.00226109	0.0205018
ENSMUSG00000042873	Lhfpl4	1245.94	712.816	1779.07	2.49583	1.31952	0.00142007	0.0146337
ENSMUSG00000048878	Hexim1	170.225	97.3911	243.059	2.4957	1.31945	0.0137103	0.0749215
ENSMUSG00000037761	Actr5	96.5064	55.2167	137.796	2.49555	1.31936	0.0134119	0.0738425
ENSMUSG00000028790	Khdrbs1	472.845	270.562	675.129	2.49528	1.3192	0.00360886	0.0289605
ENSMUSG00000051375	Pcdh1	172.784	98.8885	246.68	2.49453	1.31877	0.0109203	0.06419
ENSMUSG00000029408	Abcb9	339.205	194.177	484.233	2.49377	1.31833	0.00394622	0.030848
ENSMUSG00000000915	Hip1r	305.315	174.855	435.775	2.49221	1.31743	0.00915822	0.0566456
ENSMUSG00000024242	Map4k3	1012.3	579.913	1444.68	2.49121	1.31684	0.00149057	0.0151278
ENSMUSG00000038594	Cep85l	146.968	84.1948	209.74	2.49113	1.3168	0.0102271	0.0612349
ENSMUSG00000003199	Mpnd	188.549	108.11	268.988	2.48808	1.31504	0.012525	0.0702685
ENSMUSG00000036327	Qsox2	350.259	200.849	499.67	2.48779	1.31487	0.00457771	0.0342749
ENSMUSG00000004568	Arhgef18	521.214	299.013	743.415	2.48622	1.31396	0.00317128	0.0262842
ENSMUSG00000078652	Psme3	751.347	431.077	1071.62	2.4859	1.31377	0.00247337	0.0219397
ENSMUSG00000070639	Lrrc8b	502.462	288.319	716.604	2.48545	1.31351	0.00423992	0.0323786
ENSMUSG00000020520	Galnt10	90.3197	51.8634	128.776	2.48298	1.31207	0.0139005	0.0755907
ENSMUSG00000037594	BC022687	107.576	61.7918	153.361	2.48189	1.31144	0.0106534	0.0631611
ENSMUSG00000066324	Impad1	2572.63	1478.07	3667.19	2.48106	1.31096	0.00115899	0.0126271
ENSMUSG00000057672	Pkn1	95.945	55.1376	136.753	2.48021	1.31046	0.0141203	0.0763805
ENSMUSG00000042659	Arrdc4	274.957	158.018	391.896	2.48006	1.31038	0.00672887	0.0455733
ENSMUSG00000030583	Sipa1l3	170.868	98.2082	243.528	2.47971	1.31017	0.0100521	0.0604997
ENSMUSG00000060216	Arrb2	105.529	60.6624	150.396	2.47922	1.30989	0.0197885	0.0961464
ENSMUSG00000056091	St3gal5	746.599	429.318	1063.88	2.47807	1.30922	0.00301558	0.0254029
ENSMUSG00000019297	Nop9	168.396	96.8395	239.953	2.47784	1.30908	0.00902047	0.055964
ENSMUSG00000040653	Ppp1r14c	434.604	250.001	619.207	2.47681	1.30848	0.00474476	0.0350956
ENSMUSG00000026080	Chst10	840.946	483.751	1198.14	2.47677	1.30846	0.00209883	0.0193685
ENSMUSG00000025793	Hgs	465.26	267.646	662.874	2.47668	1.30841	0.00439427	0.0332829
ENSMUSG00000007610	Gtpbp3	85.2062	49.0424	121.37	2.4748	1.30731	0.0177137	0.0894445
ENSMUSG00000038612	Mcl1	839.768	483.518	1196.02	2.47358	1.3066	0.00218041	0.0199395
ENSMUSG00000020329	Polrmt	232.95	134.176	331.725	2.47232	1.30587	0.0109137	0.0641836
ENSMUSG00000037788	Vopp1	1993.26	1148.09	2838.42	2.4723	1.30585	0.00163498	0.0161581
ENSMUSG00000037653	Kctd8	94.9799	54.7109	135.249	2.47206	1.30571	0.01597	0.0834926
ENSMUSG00000034799	Unc13a	659.381	379.887	938.874	2.47146	1.30536	0.00294017	0.0250026
ENSMUSG00000032328	Tmem30a	1913.94	1102.83	2725.06	2.47097	1.30508	0.00181371	0.0173993
ENSMUSG00000024381	Bin1	396.997	228.835	565.158	2.46973	1.30435	0.00557704	0.0396878
ENSMUSG00000016477	E2f3	209.335	120.688	297.982	2.46904	1.30395	0.00770464	0.0501331
ENSMUSG00000036862	Dchs1	244.779	141.129	348.43	2.46888	1.30386	0.00827427	0.0526996
ENSMUSG00000048332	Lhfp	571.585	329.685	813.486	2.46747	1.30303	0.00272039	0.0236329
ENSMUSG00000018634	Crhr1	234.031	134.987	333.075	2.46746	1.30303	0.00878219	0.0549764
ENSMUSG00000045671	Spred2	439.46	253.73	625.189	2.46399	1.301	0.00420281	0.0321819
ENSMUSG00000017707	Serinc3	3016.1	1742.26	4289.93	2.46228	1.29999	0.00196121	0.0184324
ENSMUSG00000056413	Adap1	1280.06	739.537	1820.59	2.4618	1.29971	0.00323295	0.0265733
ENSMUSG00000044071	Fam19a2	931.609	538.315	1324.9	2.4612	1.29936	0.00180837	0.0173721
ENSMUSG00000048644	Ctxn1	979.141	565.88	1392.4	2.4606	1.29901	0.00310291	0.0259185
ENSMUSG00000050840	Cdh20	315.814	182.6	449.027	2.45907	1.29812	0.00561107	0.0398688
ENSMUSG00000035285	Nat14	211.213	122.157	300.269	2.45806	1.29752	0.0100282	0.0604084
ENSMUSG00000045248	Med26	103.254	59.7285	146.78	2.45745	1.29716	0.0197821	0.0961464
ENSMUSG00000055053	Nfic	554.535	320.897	788.173	2.45615	1.2964	0.0029884	0.0252352
ENSMUSG00000040276	Pacsin1	1234.2	714.773	1753.63	2.45341	1.29479	0.00229502	0.0207283
ENSMUSG00000031502	Col4a1	347.436	201.232	493.64	2.45308	1.2946	0.00586266	0.0411928
ENSMUSG00000031563	Wwc2	439.949	254.841	625.057	2.45273	1.29439	0.00419091	0.0321582
ENSMUSG00000096210	H1f0	293.1	169.801	416.399	2.45228	1.29412	0.00702725	0.046908
ENSMUSG00000038540	Tmc3	46.3804	26.8828	65.8779	2.45056	1.29311	0.0205708	0.0985343
ENSMUSG00000039621	Prex1	630.459	365.496	895.422	2.44988	1.29271	0.00364547	0.0291532
ENSMUSG00000026223	Itm2c	971.517	563.239	1379.8	2.44975	1.29264	0.00312793	0.0260336
ENSMUSG00000020170	Frs2	777.296	450.79	1103.8	2.4486	1.29195	0.0027972	0.0240593
ENSMUSG00000051391	Ywhag	3826.1	2222.6	5429.6	2.44291	1.2886	0.00373171	0.0296212
ENSMUSG00000037857	Nufip2	1451.16	843.762	2058.56	2.43975	1.28673	0.00168063	0.0164638
ENSMUSG00000002948	Map2k7	511.691	297.55	725.832	2.43936	1.2865	0.00309386	0.0258897
ENSMUSG00000038406	Scaf1	257.891	150.021	365.762	2.43807	1.28574	0.00874498	0.0548427
ENSMUSG00000061689	Dlgap4	1233.34	717.543	1749.13	2.43766	1.2855	0.00227314	0.0205793
ENSMUSG00000039809	Gabbr2	2111.87	1228.73	2995.02	2.43749	1.2854	0.00191504	0.0181335
ENSMUSG00000026960	Arl6ip6	218.708	127.36	310.055	2.43448	1.28361	0.00869548	0.0545569
ENSMUSG00000055003	Lrtm2	485.485	282.74	688.229	2.43414	1.28341	0.00321781	0.0264959
ENSMUSG00000032657	Fam189b	258.358	150.569	366.148	2.43176	1.282	0.00933204	0.0574607
ENSMUSG00000024855	Pacs1	580.047	338.128	821.965	2.43093	1.28151	0.00470241	0.0348761
ENSMUSG00000028995	Fam126a	962.988	561.457	1364.52	2.43032	1.28114	0.00179394	0.0172693
ENSMUSG00000073295	Nudt11	324.944	189.455	460.433	2.4303	1.28113	0.0072435	0.0478912
ENSMUSG00000039782	Cpeb2	896.67	522.803	1270.54	2.43024	1.2811	0.00200488	0.0187163
ENSMUSG00000079215	Zfp664	665.987	388.336	943.638	2.42995	1.28093	0.00401706	0.031261
ENSMUSG00000061306	Slc38a10	281.674	164.249	399.099	2.42985	1.28087	0.0113639	0.0658829
ENSMUSG00000042015	Wdr41	300.618	175.501	425.734	2.42582	1.27847	0.00834776	0.0529862
ENSMUSG00000021681	Aggf1	617.104	360.287	873.922	2.42563	1.27836	0.00366984	0.0292673
ENSMUSG00000036352	Ubac1	597.457	348.964	845.949	2.42417	1.27749	0.00470616	0.0348763
ENSMUSG00000005469	Prkaca	517.314	302.191	732.437	2.42375	1.27724	0.00453522	0.0340853
ENSMUSG00000026270	Capn10	337.612	197.218	478.006	2.42374	1.27724	0.00694353	0.0464608
ENSMUSG00000040414	Slc25a28	153.55	89.6975	217.402	2.42372	1.27722	0.0134737	0.0740946
ENSMUSG00000029221	Slc30a9	1141.27	666.969	1615.56	2.42225	1.27635	0.00271401	0.0235921
ENSMUSG00000021819	Zswim8	393.748	230.118	557.377	2.42213	1.27628	0.00866687	0.0544266
ENSMUSG00000020455	Trim11	248.436	145.309	351.562	2.41942	1.27466	0.0130194	0.0721389
ENSMUSG00000034648	Lrrn1	590.163	345.275	835.051	2.41851	1.27412	0.00407071	0.0314582
ENSMUSG00000067825	Pex26	217.473	127.261	307.686	2.41775	1.27367	0.00978589	0.059283
ENSMUSG00000054364	Rhob	812.797	475.671	1149.92	2.41748	1.2735	0.00275542	0.0238775
ENSMUSG00000021051	Ppp2r5e	1112.95	651.395	1574.51	2.41714	1.2733	0.00190689	0.0180909
ENSMUSG00000019996	Map7	386.212	226.07	546.354	2.41674	1.27307	0.00543757	0.0388999
ENSMUSG00000032883	Acsl3	2111.75	1236.48	2987.02	2.41576	1.27248	0.00170126	0.0165968
ENSMUSG00000031154	Otud5	392.48	229.912	555.047	2.41417	1.27153	0.00753368	0.0493875
ENSMUSG00000025544	Tm9sf2	874.361	512.219	1236.5	2.41401	1.27143	0.00313008	0.0260359
ENSMUSG00000038780	Smurf1	402.356	235.793	568.919	2.41279	1.27071	0.00592515	0.0415269
ENSMUSG00000022498	Txndc11	580.726	340.349	821.104	2.41254	1.27055	0.00403931	0.0313464
ENSMUSG00000061244	Exoc5	1250.01	732.925	1767.1	2.41102	1.26965	0.00193681	0.0182773
ENSMUSG00000056493	Foxk1	251.956	147.801	356.112	2.4094	1.26868	0.0103518	0.0618447
ENSMUSG00000042507	Elmsan1	116.884	68.6006	165.167	2.40766	1.26763	0.0184797	0.0920075
ENSMUSG00000096188	Cmtm4	617.121	362.358	871.883	2.40613	1.26672	0.00365869	0.0292254
ENSMUSG00000021610	Clptm1l	539.214	317.158	761.27	2.40028	1.26321	0.00581202	0.0409894
ENSMUSG00000001415	Smg5	384.421	226.112	542.73	2.40027	1.2632	0.00739652	0.0487174
ENSMUSG00000046861	Hectd3	325.433	191.467	459.398	2.39936	1.26265	0.0118824	0.067831
ENSMUSG00000085795	Zfp703	133.38	78.5091	188.25	2.39781	1.26172	0.0165707	0.0854746
ENSMUSG00000030584	Dpf1	156.319	92.0147	220.624	2.3977	1.26165	0.0169169	0.086579
ENSMUSG00000079083	Jrkl	145.725	85.7939	205.655	2.39709	1.26128	0.0181304	0.0907895
ENSMUSG00000033763	Mtss1l	437.229	257.423	617.035	2.39697	1.26121	0.00673232	0.0455744
ENSMUSG00000039988	Ankrd13c	368.882	217.237	520.526	2.39611	1.2607	0.00811027	0.0519648
ENSMUSG00000029869	Ephb6	719.019	423.457	1014.58	2.39595	1.2606	0.0059087	0.0414325
ENSMUSG00000052155	Acvr2a	1583.44	932.665	2234.22	2.39553	1.26034	0.00179356	0.0172693
ENSMUSG00000030753	Prkrir	700.07	412.399	987.742	2.39511	1.26009	0.00340682	0.0276426
ENSMUSG00000002058	Unc119	87.5547	51.5913	123.518	2.39417	1.25952	0.0190503	0.0937799
ENSMUSG00000039137	Whrn	233.641	137.708	329.573	2.39327	1.25898	0.0132701	0.0732346
ENSMUSG00000038366	Lasp1	950.209	560.226	1340.19	2.39223	1.25836	0.00371194	0.0295149
ENSMUSG00000056076	Eif3b	732.452	432.332	1032.57	2.38837	1.25603	0.00494455	0.0362261
ENSMUSG00000032724	Abtb2	133.201	78.6791	187.724	2.38594	1.25456	0.0199656	0.0965675
ENSMUSG00000034190	Chmp7	721.415	426.202	1016.63	2.38532	1.25418	0.00505086	0.0367916
ENSMUSG00000039176	Polg	430.177	254.154	606.2	2.38517	1.25409	0.00791855	0.0511137
ENSMUSG00000022194	Pabpn1	630.83	372.86	888.799	2.38373	1.25322	0.00401577	0.031261
ENSMUSG00000062961	Ccdc177	302.305	178.686	425.924	2.38364	1.25317	0.00843011	0.0533741
ENSMUSG00000024480	Ap3s1	209.152	123.669	294.634	2.38244	1.25244	0.0118597	0.0677673
ENSMUSG00000029860	Zyx	226.414	133.891	318.938	2.38207	1.25222	0.0141906	0.0767085
ENSMUSG00000022619	Mapk8ip2	1264.21	748.116	1780.3	2.37972	1.25079	0.00316207	0.0262235
ENSMUSG00000037400	Atp11b	1858.88	1100.3	2617.47	2.37887	1.25028	0.00236166	0.0212473
ENSMUSG00000020171	Yeats4	333.737	197.678	469.797	2.37657	1.24888	0.00834979	0.0529862
ENSMUSG00000031709	Tbc1d9	419.459	248.62	590.298	2.3743	1.2475	0.00664189	0.0451382
ENSMUSG00000037197	Rbm17	325.842	193.23	458.455	2.37258	1.24646	0.00973149	0.059108
ENSMUSG00000022299	Slc25a32	167.104	99.1302	235.077	2.3714	1.24574	0.0132751	0.0732346
ENSMUSG00000051817	Sox12	213.294	126.686	299.902	2.36729	1.24323	0.0115964	0.06673
ENSMUSG00000024422	Dhx16	140.352	83.3901	197.314	2.36615	1.24254	0.0208172	0.0990655
ENSMUSG00000057469	E2f6	329.689	195.911	463.466	2.36569	1.24226	0.007688	0.0500676
ENSMUSG00000064115	Cadm2	6472.31	3848.92	9095.7	2.36318	1.24073	0.00440556	0.0333502
ENSMUSG00000040151	Hs2st1	957.234	569.305	1345.16	2.36281	1.24051	0.00311198	0.0259475
ENSMUSG00000071855	Ccdc112	218.478	130.04	306.916	2.36017	1.23889	0.0103557	0.0618447
ENSMUSG00000015342	Xk	257.589	153.385	361.793	2.35872	1.238	0.00854272	0.0538905
ENSMUSG00000022617	Chkb	171.677	102.317	241.036	2.35577	1.2362	0.0183899	0.091758
ENSMUSG00000031988	Vps26b	1147.78	684.865	1610.7	2.35185	1.2338	0.00305206	0.025617
ENSMUSG00000042594	Sh2b3	286.017	170.696	401.337	2.35118	1.23338	0.00949707	0.0581675
ENSMUSG00000066235	Pomgnt2	338.878	202.253	475.502	2.35102	1.23329	0.0111965	0.0651845
ENSMUSG00000028098	Rnf115	1039.19	620.286	1458.09	2.35067	1.23307	0.00249435	0.0220835
ENSMUSG00000083012	Fam220a	268.708	160.408	377.007	2.3503	1.23284	0.011565	0.0666206
ENSMUSG00000026470	Stx6	527.347	314.832	739.863	2.35002	1.23268	0.00584776	0.0411162
ENSMUSG00000023460	Rab12	937.887	560.273	1315.5	2.34796	1.23141	0.00338308	0.027499
ENSMUSG00000040543	Pitpnm3	284.886	170.233	399.538	2.34702	1.23083	0.0114456	0.0661362
ENSMUSG00000032839	Trpc1	701.892	419.415	984.369	2.347	1.23082	0.00403293	0.0313143
ENSMUSG00000073700	Klhl21	168.787	100.908	236.665	2.34535	1.2298	0.0140935	0.0763489
ENSMUSG00000029436	Mmp17	443.702	265.302	622.101	2.34488	1.22951	0.0102648	0.0614342
ENSMUSG00000032087	Dscaml1	147.859	88.4272	207.291	2.3442	1.2291	0.0172991	0.0878616
ENSMUSG00000003308	Keap1	373.374	223.334	523.415	2.34364	1.22875	0.00876528	0.0549452
ENSMUSG00000017686	Rhot1	1108.96	663.333	1554.59	2.34361	1.22873	0.00309806	0.025904
ENSMUSG00000025821	Zfp282	424.364	253.901	594.828	2.34276	1.22821	0.00671937	0.0455326
ENSMUSG00000017478	Zc3h18	229.035	137.059	321.011	2.34214	1.22782	0.0131241	0.0726523
ENSMUSG00000028433	Ubap2	378.681	226.683	530.679	2.34106	1.22716	0.0105736	0.0628489
ENSMUSG00000024219	Anks1	209.334	125.336	293.331	2.34035	1.22673	0.0161617	0.0841777
ENSMUSG00000030747	Dgat2	680.932	407.73	954.134	2.34011	1.22658	0.00616136	0.0426657
ENSMUSG00000040631	Dok4	281.332	168.508	394.156	2.3391	1.22595	0.0128999	0.0717465
ENSMUSG00000020642	Rnf144a	586.2	351.486	820.913	2.33555	1.22376	0.00474824	0.0351026
ENSMUSG00000025666	Tmem47	1060.42	636.128	1484.71	2.33397	1.22279	0.00406356	0.0314518
ENSMUSG00000030232	Aebp2	650.814	390.746	910.882	2.33114	1.22103	0.00445576	0.0336569
ENSMUSG00000031227	Magee1	1290.53	775.455	1805.61	2.32845	1.21937	0.00331253	0.0270991
ENSMUSG00000034402	Kcnh5	744.321	447.256	1041.39	2.32839	1.21933	0.00500322	0.0365788
ENSMUSG00000021629	Slc30a5	784.845	471.888	1097.8	2.3264	1.2181	0.00382363	0.0301583
ENSMUSG00000056214	Pard6g	129.761	78.0501	181.472	2.32507	1.21727	0.0207171	0.0989001
ENSMUSG00000043391	2510009E07Rik	1753.8	1055.14	2452.47	2.3243	1.2168	0.00282476	0.0242214
ENSMUSG00000036275	9530068E07Rik	1117.04	672.044	1562.03	2.32429	1.21679	0.00314898	0.0261618
ENSMUSG00000003575	Crtc1	856.091	515.103	1197.08	2.32396	1.21659	0.00449139	0.0338156
ENSMUSG00000028541	B4galt2	485.705	292.344	679.066	2.32283	1.21589	0.00962102	0.0587195
ENSMUSG00000026670	Uap1	538.331	324.137	752.525	2.32162	1.21513	0.00618597	0.0427935
ENSMUSG00000028266	Lmo4	990.012	596.331	1383.69	2.32034	1.21434	0.00292118	0.024864
ENSMUSG00000033319	Fem1c	406.354	244.772	567.936	2.32026	1.21429	0.00997887	0.0601404
ENSMUSG00000027184	Caprin1	1999	1204.58	2793.41	2.319	1.2135	0.00323075	0.026571
ENSMUSG00000044700	Tmem201	387.286	233.382	541.191	2.31891	1.21345	0.00959451	0.0585835
ENSMUSG00000026974	Zmynd19	240.499	144.975	336.023	2.3178	1.21275	0.011165	0.0651104
ENSMUSG00000029602	Rasal1	284.647	171.606	397.687	2.31744	1.21253	0.0168682	0.0864968
ENSMUSG00000024059	Clip4	463.882	279.67	648.093	2.31735	1.21248	0.00660817	0.044975
ENSMUSG00000042099	Kank3	133.482	80.4811	186.483	2.31711	1.21232	0.019283	0.0944834
ENSMUSG00000070871	Ccnyl1	188.975	113.957	263.994	2.31661	1.21202	0.0159672	0.0834926
ENSMUSG00000021288	Klc1	1668.8	1006.39	2331.22	2.31641	1.21189	0.00441761	0.033405
ENSMUSG00000035640	Dos	377.94	228.048	527.831	2.31455	1.21073	0.0145883	0.0782697
ENSMUSG00000030880	Polr3e	329.558	198.944	460.171	2.31306	1.20981	0.0104133	0.0621089
ENSMUSG00000031555	Adam9	592.131	357.512	826.75	2.31251	1.20946	0.00607548	0.0422395
ENSMUSG00000028124	Gclm	669.005	403.955	934.056	2.31228	1.20931	0.00484515	0.0356622
ENSMUSG00000021277	Traf3	806.51	487.393	1125.63	2.30949	1.20757	0.00521028	0.0377351
ENSMUSG00000025227	Tmem180	195.455	118.135	272.774	2.30901	1.20728	0.016269	0.084515
ENSMUSG00000034807	Colgalt1	567.73	343.314	792.146	2.30735	1.20624	0.00724218	0.0478912
ENSMUSG00000037656	Slc20a2	537.689	325.18	750.199	2.30703	1.20604	0.0068745	0.0461545
ENSMUSG00000025582	Nptx1	617.323	373.416	861.23	2.30636	1.20561	0.00882863	0.0551382
ENSMUSG00000024947	Men1	380.893	230.424	531.363	2.30603	1.20541	0.0131642	0.0728074
ENSMUSG00000042572	Ube2q1	499.209	302.31	696.109	2.30263	1.20329	0.00878609	0.0549764
ENSMUSG00000029640	Usp12	316.072	191.5	440.643	2.301	1.20226	0.0122367	0.0690693
ENSMUSG00000039713	Plekhg5	241.728	146.462	336.995	2.30091	1.2022	0.0147994	0.0790079
ENSMUSG00000004500	Zfp324	203.576	123.361	283.792	2.3005	1.20195	0.0199359	0.0965559
ENSMUSG00000026833	Olfm1	3072.01	1862.2	4281.82	2.29933	1.20121	0.0058702	0.0412249
ENSMUSG00000059273	Zc3h4	289.721	175.714	403.729	2.29766	1.20016	0.0135937	0.0745186
ENSMUSG00000024789	Jak2	454.571	275.733	633.409	2.29718	1.19986	0.0083401	0.0529732
ENSMUSG00000024773	Atg2a	256.128	155.381	356.875	2.29677	1.19961	0.0163285	0.0847286
ENSMUSG00000020190	Mknk2	343.145	208.186	478.104	2.29652	1.19945	0.00976152	0.0592104
ENSMUSG00000048807	Slc35e4	247.943	150.492	345.394	2.2951	1.19856	0.016804	0.0863173
ENSMUSG00000035274	Tpbg	346.061	210.144	481.977	2.29355	1.19758	0.011003	0.0644359
ENSMUSG00000029319	Coq2	367.17	223.065	511.275	2.29205	1.19664	0.0122578	0.0691325
ENSMUSG00000027957	Slc35a3	405.161	246.36	563.963	2.28918	1.19483	0.0100424	0.0604674
ENSMUSG00000052539	Magi3	870.105	529.165	1211.05	2.2886	1.19446	0.0049355	0.0361789
ENSMUSG00000033430	Terf2ip	592.25	360.267	824.234	2.28784	1.19399	0.00664783	0.0451565
ENSMUSG00000023883	Phf10	510.971	310.849	711.094	2.28759	1.19383	0.00934218	0.0574977
ENSMUSG00000074064	Mlycd	252.804	153.879	351.729	2.28575	1.19267	0.0114979	0.0663555
ENSMUSG00000021608	Lpcat1	783.989	477.267	1090.71	2.28533	1.1924	0.00399948	0.0311767
ENSMUSG00000042558	Adprhl2	213.19	129.815	296.564	2.28451	1.19188	0.0194979	0.0951672
ENSMUSG00000044502	Bod1	420.005	255.755	584.255	2.28443	1.19183	0.00770529	0.0501331
ENSMUSG00000026499	Acbd3	612.748	373.189	852.308	2.28385	1.19147	0.00706075	0.0470412
ENSMUSG00000058152	Chsy3	205.033	124.874	285.191	2.28383	1.19145	0.0165083	0.0852163
ENSMUSG00000001100	Poldip2	558.292	340.116	776.467	2.28295	1.1909	0.00822559	0.0525099
ENSMUSG00000048796	Cyb561d1	171.559	104.56	238.557	2.28153	1.19	0.0191458	0.0940407
ENSMUSG00000042492	Tbc1d10b	528.917	322.516	735.317	2.27994	1.18899	0.006954	0.0465084
ENSMUSG00000046707	Csnk2a2	314.213	191.796	436.629	2.27653	1.18684	0.0121746	0.0688524
ENSMUSG00000008305	Tle1	479.285	292.59	665.98	2.27615	1.1866	0.00791337	0.0511137
ENSMUSG00000039156	Stim2	583.429	356.21	810.647	2.27576	1.18635	0.00603851	0.0420667
ENSMUSG00000005069	Pex5	603.019	368.756	837.282	2.27056	1.18305	0.00709682	0.0472362
ENSMUSG00000051343	Rab11fip5	361.824	221.346	502.303	2.26931	1.18226	0.0115678	0.0666206
ENSMUSG00000031601	Cnot7	1279.16	782.741	1775.58	2.26841	1.18168	0.00402178	0.0312803
ENSMUSG00000026159	Agfg1	1343.89	822.739	1865.04	2.26686	1.1807	0.00387726	0.0304805
ENSMUSG00000034761	Map4k5	1189.63	728.389	1650.87	2.26647	1.18045	0.00378948	0.0299726
ENSMUSG00000036707	Cab39	1715.23	1050.23	2380.23	2.26639	1.18039	0.00464206	0.0345553
ENSMUSG00000021065	Fut8	1029.41	630.682	1428.14	2.26443	1.17915	0.00455941	0.0341662
ENSMUSG00000035954	Dock4	1337.76	821.825	1853.69	2.25558	1.1735	0.00433166	0.032907
ENSMUSG00000021893	Capn7	886.105	544.768	1227.44	2.25315	1.17194	0.00497871	0.0364568
ENSMUSG00000019817	Plagl1	429.153	263.882	594.424	2.25262	1.1716	0.010899	0.0641517
ENSMUSG00000021559	Dapk1	854.845	525.764	1183.93	2.25182	1.17109	0.00602713	0.0420295
ENSMUSG00000058446	Znrf2	440.601	271.189	610.014	2.24941	1.16954	0.0103522	0.0618447
ENSMUSG00000063358	Mapk1	5030.32	3097	6963.64	2.24851	1.16897	0.00754804	0.0494089
ENSMUSG00000030515	Tarsl2	396.511	244.209	548.813	2.24731	1.1682	0.0127088	0.0709132
ENSMUSG00000038248	Sobp	758.688	467.428	1049.95	2.24623	1.1675	0.00656578	0.044759
ENSMUSG00000059316	Slc27a4	733.409	451.885	1014.93	2.246	1.16736	0.00828125	0.0527199
ENSMUSG00000034463	Scara3	158.307	97.5421	219.072	2.24593	1.16731	0.0206212	0.0986735
ENSMUSG00000036779	Papd5	632.296	389.626	874.966	2.24565	1.16714	0.0064874	0.04448
ENSMUSG00000050627	Gpd1l	832.268	512.895	1151.64	2.24538	1.16696	0.00786277	0.0508907
ENSMUSG00000002808	Epdr1	579.927	357.478	802.377	2.24455	1.16643	0.0103191	0.0617325
ENSMUSG00000046159	Chrm3	265.523	163.754	367.291	2.24295	1.1654	0.0166289	0.0856797
ENSMUSG00000029684	Wasl	1029.13	634.924	1423.34	2.24175	1.16463	0.00464435	0.0345553
ENSMUSG00000024687	Osbp	727.414	448.946	1005.88	2.24054	1.16385	0.00725617	0.0479378
ENSMUSG00000089911	Hiat1	1422.7	878.336	1967.07	2.23954	1.1632	0.00392561	0.0307388
ENSMUSG00000031605	Klhl2	1210.22	747.21	1673.23	2.23931	1.16305	0.00464148	0.0345553
ENSMUSG00000027351	Spred1	1731.44	1069.68	2393.19	2.2373	1.16176	0.00416309	0.0319768
ENSMUSG00000015488	Cacfd1	1018.03	628.999	1407.06	2.23698	1.16155	0.00554783	0.0395205
ENSMUSG00000032878	Ccdc85a	934.605	578.567	1290.64	2.23075	1.15753	0.00645888	0.0443583
ENSMUSG00000074102	Rbm15b	513.239	317.789	708.688	2.23006	1.15708	0.0121436	0.0688237
ENSMUSG00000033342	Lppr5	1119.88	693.447	1546.32	2.2299	1.15698	0.00535533	0.0384846
ENSMUSG00000036989	Trim3	751.252	465.504	1037	2.22769	1.15555	0.00833739	0.0529732
ENSMUSG00000034354	Mtmr3	1219	755.414	1682.58	2.22737	1.15534	0.00528722	0.0381532
ENSMUSG00000037509	Arhgef4	907.669	562.496	1252.84	2.22729	1.15529	0.00671959	0.0455326
ENSMUSG00000020634	Ubxn2a	774.063	479.899	1068.23	2.22594	1.15442	0.00725752	0.0479378
ENSMUSG00000037972	Snn	696.532	431.832	961.232	2.22594	1.15441	0.00901915	0.055964
ENSMUSG00000038400	Pmepa1	951.92	590.333	1313.51	2.22502	1.15382	0.00581382	0.0409894
ENSMUSG00000022742	Cpox	424.48	263.497	585.464	2.2219	1.1518	0.00947084	0.0580324
ENSMUSG00000040520	Manea	732.504	455.612	1009.4	2.21548	1.14762	0.00767833	0.0500676
ENSMUSG00000024095	Hnrnpll	667.859	415.555	920.163	2.2143	1.14685	0.00727436	0.0480039
ENSMUSG00000022533	Atp13a3	657.015	408.873	905.157	2.21379	1.14652	0.00809753	0.0519311
ENSMUSG00000028572	Hook1	1442.37	897.866	1986.87	2.21288	1.14592	0.00533086	0.0383883
ENSMUSG00000006463	Zdhhc24	400.979	249.64	552.318	2.21246	1.14565	0.0131277	0.0726523
ENSMUSG00000033478	Fam160b1	625.34	389.352	861.328	2.21221	1.14549	0.00813464	0.052097
ENSMUSG00000031290	Lrch2	379.577	236.351	522.804	2.21199	1.14534	0.0119522	0.0680442
ENSMUSG00000024462	Gabbr1	1448.08	901.84	1994.31	2.21138	1.14495	0.00561494	0.0398759
ENSMUSG00000000149	Gna12	568.699	354.178	783.219	2.21137	1.14494	0.00971157	0.0590387
ENSMUSG00000021282	Eif5	2483.48	1547.22	3419.74	2.21025	1.14421	0.00566652	0.0401805
ENSMUSG00000032850	Rnft2	372.089	231.847	512.33	2.20977	1.1439	0.0199183	0.0965404
ENSMUSG00000029128	Rab28	751.111	468.065	1034.16	2.20943	1.14367	0.00712976	0.0474327
ENSMUSG00000078676	Casc3	618.268	385.344	851.192	2.20891	1.14334	0.00936559	0.0575907
ENSMUSG00000039703	Nploc4	989.894	617.16	1362.63	2.2079	1.14267	0.00688983	0.0461904
ENSMUSG00000049420	Tmem200a	254.274	158.621	349.927	2.20606	1.14147	0.0201863	0.0972286
ENSMUSG00000032350	Gclc	649.466	405.28	893.653	2.20503	1.1408	0.00885902	0.0552585
ENSMUSG00000024176	Sox8	302.61	188.856	416.364	2.20466	1.14056	0.015112	0.0802447
ENSMUSG00000024286	Ccny	453.566	283.105	624.028	2.20423	1.14027	0.0115517	0.0666206
ENSMUSG00000027546	Atp9a	1209.06	755.047	1663.08	2.20262	1.13922	0.00891265	0.0554933
ENSMUSG00000035007	Rundc1	407.329	254.53	560.127	2.20063	1.13792	0.0123751	0.0695397
ENSMUSG00000028152	Tspan5	1126.19	704.001	1548.38	2.19939	1.13711	0.00553461	0.0394466
ENSMUSG00000049680	Urgcp	568.094	355.625	780.563	2.19491	1.13416	0.00877325	0.0549703
ENSMUSG00000042208	0610010F05Rik	1221.93	764.96	1678.9	2.19475	1.13406	0.0054813	0.0391469
ENSMUSG00000033697	Arhgap39	412.584	258.458	566.71	2.19265	1.13268	0.0119673	0.0680744
ENSMUSG00000052928	Ctif	357.769	224.306	491.232	2.19001	1.13094	0.0170404	0.0868656
ENSMUSG00000034902	Pip5k1c	1575	988.04	2161.96	2.18813	1.1297	0.0100565	0.0605
ENSMUSG00000021930	Spryd7	645.056	404.975	885.138	2.18566	1.12807	0.00976539	0.0592104
ENSMUSG00000022199	Slc22a17	1082.8	679.923	1485.69	2.18508	1.12769	0.012013	0.0682306
ENSMUSG00000024515	Smad4	977.896	614.205	1341.59	2.18426	1.12715	0.0059358	0.0415806
ENSMUSG00000019831	Wasf1	2583.84	1623.25	3544.42	2.18353	1.12666	0.00530794	0.0382827
ENSMUSG00000039652	Cpeb3	421.493	265.011	577.974	2.18094	1.12495	0.0122834	0.0691503
ENSMUSG00000072437	Nanos1	360.241	226.57	493.912	2.17995	1.1243	0.0172944	0.0878616
ENSMUSG00000031885	Cbfb	294.717	185.45	403.985	2.1784	1.12327	0.0186501	0.0924254
ENSMUSG00000060733	Ipmk	535.424	337.124	733.725	2.17643	1.12196	0.0116665	0.0669878
ENSMUSG00000029578	Wipi2	1225.61	771.886	1679.34	2.17563	1.12143	0.00645517	0.0443583
ENSMUSG00000029208	Guf1	995.726	627.548	1363.9	2.17338	1.11994	0.00682513	0.0458896
ENSMUSG00000024259	Slc25a46	1769.4	1116.32	2422.48	2.17006	1.11774	0.00508198	0.0369626
ENSMUSG00000035666	Gtf3c4	813.978	513.554	1114.4	2.16998	1.11768	0.00803808	0.051646
ENSMUSG00000021062	Rab15	1257.68	793.852	1721.51	2.16855	1.11673	0.0113047	0.065622
ENSMUSG00000040782	Rfwd2	217.834	137.552	298.116	2.1673	1.1159	0.0210253	0.0997139
ENSMUSG00000026158	Ogfrl1	880.574	556.158	1204.99	2.16663	1.11545	0.00774406	0.0503352
ENSMUSG00000058388	Phtf1	637.949	403.12	872.778	2.16506	1.1144	0.00954939	0.0584106
ENSMUSG00000035529	Prdm4	489.468	309.431	669.505	2.16367	1.11348	0.0128561	0.0716053
ENSMUSG00000055407	Map6	1495.55	945.704	2045.39	2.16282	1.11292	0.00786267	0.0508907
ENSMUSG00000022043	Trim35	2180.98	1379.17	2982.79	2.16274	1.11286	0.00655937	0.044759
ENSMUSG00000048234	Rnf149	256.197	162.167	350.227	2.15967	1.11081	0.0182774	0.0913279
ENSMUSG00000039717	Ralyl	880.002	557.288	1202.72	2.15816	1.1098	0.0096416	0.0587935
ENSMUSG00000047013	Fbxo41	1098.41	696.366	1500.46	2.1547	1.10749	0.00988865	0.0597751
ENSMUSG00000028560	Usp1	270.923	171.982	369.863	2.15058	1.10473	0.0205913	0.0985981
ENSMUSG00000039050	Osbpl2	722.01	458.476	985.545	2.14961	1.10408	0.011019	0.0645026
ENSMUSG00000031906	Smpd3	1088.53	691.703	1485.35	2.14738	1.10258	0.00909631	0.0563338
ENSMUSG00000070939	Tgfbrap1	565.898	359.611	772.185	2.14728	1.10251	0.0137212	0.0749257
ENSMUSG00000026309	Ilkap	361.237	229.837	492.637	2.14342	1.09991	0.0170686	0.0869452
ENSMUSG00000070802	Pnmal2	704.258	448.565	959.952	2.14005	1.09765	0.011672	0.0669878
ENSMUSG00000023018	Smarcd1	607.336	386.908	827.764	2.13943	1.09723	0.0130338	0.0721901
ENSMUSG00000031561	Tenm3	941.496	599.922	1283.07	2.13873	1.09675	0.0096404	0.0587935
ENSMUSG00000032184	Lysmd2	394.711	251.591	537.83	2.13771	1.09607	0.0156193	0.0821553
ENSMUSG00000035949	Fbxw2	972.569	620.037	1325.1	2.13714	1.09568	0.00599486	0.0419519
ENSMUSG00000032290	Ptpn9	392.624	250.404	534.845	2.13593	1.09486	0.0149005	0.0794252
ENSMUSG00000026618	Iars2	476.91	304.442	649.377	2.13301	1.09289	0.0181514	0.0908618
ENSMUSG00000038602	Slc35f1	642.428	410.26	874.597	2.13181	1.09208	0.0126833	0.0708421
ENSMUSG00000060681	Slc9a6	455.761	291.074	620.449	2.13158	1.09193	0.0185017	0.092051
ENSMUSG00000015869	Prpsap1	365.526	233.801	497.25	2.12681	1.08869	0.0184056	0.0917626
ENSMUSG00000007411	Mark3	1359.96	870.241	1849.68	2.12548	1.08779	0.00817828	0.0523523
ENSMUSG00000041817	Fam169a	947.023	606.023	1288.02	2.12537	1.08771	0.00791752	0.0511137
ENSMUSG00000036377	C530008M17Rik	748.643	479.087	1018.2	2.12529	1.08766	0.0121784	0.0688524
ENSMUSG00000039968	Rsbn1l	302.089	193.486	410.693	2.1226	1.08583	0.0156573	0.082234
ENSMUSG00000000838	Fmr1	1074.35	689.262	1459.43	2.11738	1.08228	0.00908628	0.0562968
ENSMUSG00000032898	Fbxo21	1485.41	953.502	2017.31	2.11569	1.08113	0.00746826	0.0491149
ENSMUSG00000058756	Thra	1758.17	1129.11	2387.23	2.11427	1.08016	0.00800727	0.0514949
ENSMUSG00000054008	Ndst1	664.349	426.76	901.937	2.11345	1.0796	0.0144967	0.077961
ENSMUSG00000002546	Golga2	516.823	332.005	701.642	2.11335	1.07953	0.0173391	0.0879681
ENSMUSG00000038481	Cdk19	753.605	484.21	1023	2.11272	1.0791	0.0127114	0.0709132
ENSMUSG00000026819	Slc25a25	512.094	329.047	695.142	2.11259	1.07902	0.0169296	0.0865864
ENSMUSG00000033594	Spata2l	1118.75	718.987	1518.51	2.11201	1.07862	0.0100836	0.0605925
ENSMUSG00000002221	Paxip1	491.52	316.301	666.739	2.10793	1.07583	0.0196047	0.0955538
ENSMUSG00000015087	Rabl6	649.282	417.83	880.735	2.10788	1.07579	0.0146152	0.0783254
ENSMUSG00000093904	Tomm20	778.027	500.835	1055.22	2.10692	1.07513	0.0154199	0.081444
ENSMUSG00000032563	Mrpl3	507.687	326.856	688.518	2.10649	1.07484	0.0152699	0.0809287
ENSMUSG00000037134	Prmt10	525.212	338.457	711.967	2.10356	1.07284	0.0135854	0.0745027
ENSMUSG00000026457	Adipor1	910.567	587.585	1233.55	2.09936	1.06995	0.0101219	0.060762
ENSMUSG00000020366	Mapk9	1667.69	1077.59	2257.78	2.09521	1.0671	0.0098413	0.0595148
ENSMUSG00000023050	Map3k12	708.702	458.085	959.319	2.0942	1.0664	0.0112879	0.0656066
ENSMUSG00000018965	Ywhah	3169.18	2052.12	4286.24	2.08869	1.0626	0.0132538	0.0732044
ENSMUSG00000053436	Mapk14	1383.67	896.138	1871.2	2.08807	1.06217	0.00944466	0.057923
ENSMUSG00000047539	Fbxo28	772.315	500.285	1044.35	2.0875	1.06178	0.0134214	0.0738655
ENSMUSG00000028669	Pithd1	350.613	227.192	474.033	2.08649	1.06108	0.0194332	0.0949647
ENSMUSG00000024642	Tle4	999.614	647.802	1351.42	2.08617	1.06086	0.00994445	0.0600863
ENSMUSG00000031691	Tnpo2	668.879	433.644	904.114	2.08492	1.05999	0.0182293	0.0911911
ENSMUSG00000031352	Hccs	898.456	582.499	1214.41	2.08483	1.05993	0.0136366	0.0746362
ENSMUSG00000002017	Fam98a	494.058	320.535	667.582	2.08271	1.05846	0.0198476	0.0963322
ENSMUSG00000020362	Cnot6	1323.74	858.965	1788.52	2.08218	1.05809	0.00878001	0.0549764
ENSMUSG00000027177	Hipk3	1864.64	1210.73	2518.56	2.0802	1.05672	0.00806662	0.0517568
ENSMUSG00000024068	Spast	826.358	538.054	1114.66	2.07165	1.05078	0.0137622	0.0751161
ENSMUSG00000049100	Pcdh10	1339.69	873.047	1806.32	2.06899	1.04893	0.00906069	0.0561884
ENSMUSG00000032320	Rcn2	1142.54	744.774	1540.31	2.06816	1.04835	0.0120354	0.0682942
ENSMUSG00000060002	Chpt1	578.373	377.168	779.579	2.06693	1.04749	0.0143735	0.0774186
ENSMUSG00000023965	Fbxl17	482.42	314.721	650.12	2.0657	1.04663	0.0210218	0.0997139
ENSMUSG00000043683	Fem1a	812.413	530.024	1094.8	2.06557	1.04654	0.0135399	0.0743115
ENSMUSG00000027109	Sp3	950.287	620.062	1280.51	2.06514	1.04624	0.0096642	0.0589054
ENSMUSG00000002222	Rmnd5a	1327.73	866.713	1788.74	2.06382	1.04532	0.0109638	0.0642882
ENSMUSG00000024811	Tnks2	2237.15	1460.6	3013.7	2.06333	1.04498	0.0114133	0.0660198
ENSMUSG00000062761	Zfp512	757.433	494.677	1020.19	2.06233	1.04428	0.0151803	0.080546
ENSMUSG00000051726	Kcnf1	1247.13	814.499	1679.76	2.06232	1.04427	0.011416	0.0660198
ENSMUSG00000037514	Pank2	549.991	359.239	740.743	2.06197	1.04403	0.019041	0.0937799
ENSMUSG00000054604	Cggbp1	1093.67	714.925	1472.41	2.05953	1.04231	0.0106057	0.0629859
ENSMUSG00000075376	Rc3h2	2809.71	1837.16	3782.26	2.05875	1.04177	0.0103949	0.0620523
ENSMUSG00000036241	Ube2r2	570.787	373.611	767.963	2.05551	1.0395	0.0176606	0.0892886
ENSMUSG00000037855	Zfp365	2381.4	1559.12	3203.67	2.05479	1.03899	0.00995016	0.0600947
ENSMUSG00000025786	Zdhhc3	694.913	455.015	934.811	2.05446	1.03876	0.017758	0.0896027
ENSMUSG00000074671	Tspyl3	502.428	329.096	675.761	2.05339	1.038	0.0199296	0.0965559
ENSMUSG00000023915	Tnfrsf21	817.672	535.741	1099.6	2.05249	1.03738	0.0142893	0.0771145
ENSMUSG00000020823	Sec14l1	1393.39	913.271	1873.52	2.05144	1.03664	0.0125246	0.0702685
ENSMUSG00000037138	Aff3	539.805	353.877	725.733	2.05081	1.03619	0.0188094	0.0930158
ENSMUSG00000038615	Nfe2l1	897.27	588.223	1206.32	2.05078	1.03618	0.014566	0.0781882
ENSMUSG00000041180	Hectd2	614.99	403.357	826.622	2.04935	1.03517	0.0194375	0.0949647
ENSMUSG00000036568	Gltscr1l	641.783	421.045	862.521	2.04853	1.03459	0.0170675	0.0869452
ENSMUSG00000045983	Eif4g1	1021.64	670.537	1372.73	2.04722	1.03366	0.0120515	0.0683573
ENSMUSG00000034707	Gns	645.878	424.008	867.749	2.04654	1.03319	0.01921	0.0942921
ENSMUSG00000027782	Kpna4	855.466	561.861	1149.07	2.04512	1.03218	0.0125588	0.0703729
ENSMUSG00000026626	Ppp2r5a	714.285	469.53	959.041	2.04256	1.03038	0.013294	0.0732513
ENSMUSG00000063760	Rnf217	630.963	414.893	847.033	2.04157	1.02968	0.0147328	0.0788644
ENSMUSG00000079157	Fam155a	698.207	459.134	937.279	2.04141	1.02956	0.015536	0.0818703
ENSMUSG00000030059	Tmf1	571.613	376.1	767.126	2.03969	1.02835	0.018762	0.0928475
ENSMUSG00000029068	Ccnl2	1279.48	842.128	1716.82	2.03867	1.02763	0.0138561	0.0754802
ENSMUSG00000021012	Zc3h14	634.619	418	851.238	2.03646	1.02606	0.019088	0.0938789
ENSMUSG00000031751	Amfr	931.702	613.963	1249.44	2.03504	1.02506	0.0162653	0.084515
ENSMUSG00000038822	Hace1	520.436	342.958	697.914	2.03498	1.02502	0.0200134	0.0967316
ENSMUSG00000001300	Efnb2	875.366	577.423	1173.31	2.03197	1.02288	0.0125362	0.070303
ENSMUSG00000041415	Dicer1	729.331	481.247	977.416	2.03101	1.0222	0.017726	0.0894736
ENSMUSG00000035936	Aldh5a1	578.145	381.625	774.664	2.02991	1.02142	0.020644	0.0987231
ENSMUSG00000016921	Srsf6	1121.95	740.707	1503.19	2.0294	1.02105	0.0141184	0.0763805
ENSMUSG00000027303	Ptpra	1431.88	945.614	1918.15	2.02848	1.0204	0.0147178	0.0788167
ENSMUSG00000038910	Plcl2	724.658	478.583	970.733	2.02835	1.02031	0.0207105	0.0989001
ENSMUSG00000020271	Fbxw11	1483.82	980.144	1987.49	2.02776	1.01988	0.0131715	0.0728074
ENSMUSG00000052302	Tbc1d30	984.814	650.738	1318.89	2.02676	1.01918	0.0118695	0.0677959
ENSMUSG00000024383	Map3k2	1021.28	674.835	1367.73	2.02676	1.01917	0.0118864	0.067831
ENSMUSG00000001576	Ergic1	799.095	528.539	1069.65	2.02379	1.01706	0.0161915	0.0842697
ENSMUSG00000042364	Snx18	493.585	326.624	660.546	2.02235	1.01603	0.0190421	0.0937799
ENSMUSG00000040351	Ankib1	861.927	570.651	1153.2	2.02086	1.01497	0.0148665	0.0793052
ENSMUSG00000024096	Ralbp1	466.491	308.955	624.026	2.01979	1.01421	0.0196585	0.0957488
ENSMUSG00000025199	Chuk	1228.5	814.224	1642.77	2.01759	1.01263	0.0139126	0.0756103
ENSMUSG00000041040	Fam117b	1018.29	675.049	1361.53	2.01693	1.01216	0.0130062	0.0721232
ENSMUSG00000029227	Fip1l1	1062.96	704.872	1421.06	2.01605	1.01153	0.0145359	0.0780814
ENSMUSG00000031703	Itfg1	1258.7	835.26	1682.14	2.01391	1.01	0.0198864	0.0964534
ENSMUSG00000029787	Avl9	910.907	604.861	1216.95	2.01196	1.0086	0.0190582	0.0937799
ENSMUSG00000000420	Galnt1	699.559	465.384	933.734	2.00637	1.00459	0.0204086	0.0980275
ENSMUSG00000028436	Dcaf12	917.118	610.152	1224.08	2.0062	1.00446	0.0183459	0.0916042
ENSMUSG00000018398	Sept8	1400.38	931.935	1868.83	2.00532	1.00383	0.0165077	0.0852163
ENSMUSG00000040565	Btaf1	907.726	604.37	1211.08	2.00387	1.00279	0.0153885	0.081327
ENSMUSG00000049470	Aff4	3498.38	2332.27	4664.49	1.99998	0.999983	0.0166798	0.0858759
ENSMUSG00000072704	2700089E24Rik	968.775	646.15	1291.4	1.99861	0.998997	0.0153145	0.0810723
ENSMUSG00000001419	Mef2d	930.992	621.613	1240.37	1.99541	0.996686	0.0206869	0.0988516
ENSMUSG00000022433	Csnk1e	910.457	608.073	1212.84	1.99456	0.996073	0.0172218	0.0875527
ENSMUSG00000028278	Rragd	844.721	564.593	1124.85	1.99232	0.99445	0.0210105	0.0997139
ENSMUSG00000022305	Lrp12	758.933	507.727	1010.14	1.98953	0.992429	0.0203429	0.0977758
ENSMUSG00000051615	Rap2a	1989.89	1331.76	2648.01	1.98835	0.991572	0.0137043	0.0749178
ENSMUSG00000007815	Rhoa	857.991	574.814	1141.17	1.98528	0.989343	0.0198064	0.0961979
ENSMUSG00000060671	Atp8b2	1145.96	768.115	1523.81	1.98383	0.98829	0.0177858	0.089678
ENSMUSG00000036298	Slc2a13	1218.16	817.28	1619.04	1.98101	0.986237	0.0178468	0.0898382
ENSMUSG00000046314	Stxbp6	967.099	648.862	1285.34	1.98091	0.986164	0.018992	0.0936854
ENSMUSG00000032601	Prkar2a	1031.37	692.144	1370.59	1.98021	0.985652	0.0178564	0.0898382
ENSMUSG00000021096	Ppm1a	995.346	668.675	1322.02	1.97707	0.983364	0.0189736	0.0936277
ENSMUSG00000028033	Kcnq5	929.46	624.472	1234.45	1.97679	0.983157	0.0208361	0.0991215
ENSMUSG00000025104	Hdgfrp3	1231.64	828.426	1634.85	1.97344	0.980716	0.0153728	0.081288
ENSMUSG00000041014	Nrg3	1222.72	826.035	1619.4	1.96045	0.971186	0.0176974	0.0893944
ENSMUSG00000042155	Klhl23	2639.88	1783.58	3496.17	1.96019	0.970997	0.0167701	0.0862471
ENSMUSG00000044340	Phlpp1	789.561	533.776	1045.35	1.9584	0.969676	0.0199536	0.0965675
ENSMUSG00000060227	Casc4	1395.24	943.509	1846.98	1.95756	0.969059	0.0156133	0.0821553
ENSMUSG00000038546	Ranbp9	844.87	571.356	1118.38	1.95742	0.968954	0.0205501	0.0984717
ENSMUSG00000070695	Cntnap5a	1068.27	722.726	1413.82	1.95623	0.968077	0.0164356	0.0850305
ENSMUSG00000054752	Fsd1l	946.942	640.782	1253.1	1.95558	0.967599	0.017811	0.0897398
ENSMUSG00000055373	Fut9	4561.01	3090.37	6031.64	1.95175	0.964769	0.02027	0.0975303
ENSMUSG00000025658	Cnksr2	2926.64	1986.57	3866.71	1.94643	0.960828	0.0191323	0.0940155
ENSMUSG00000029775	Klhdc10	1430.7	971.858	1889.54	1.94425	0.959215	0.0207429	0.0989001
ENSMUSG00000039982	Dtx4	1816.4	1238.24	2394.55	1.93383	0.951459	0.0192345	0.0943385
ENSMUSG00000026502	Desi2	934.147	636.965	1231.33	1.93312	0.950931	0.0206656	0.0987838
ENSMUSG00000048251	Bcl11b	900.014	614.136	1185.89	1.93099	0.949344	0.0179243	0.0901146
ENSMUSG00000037075	Rnf139	896.616	611.869	1181.36	1.93075	0.949159	0.020855	0.0991772
ENSMUSG00000018846	Pank3	1805.86	1236.64	2375.09	1.9206	0.941559	0.0172257	0.0875527
ENSMUSG00000041483	Zfp281	1860.67	1281.87	2439.47	1.90305	0.928312	0.0170212	0.0868314
ENSMUSG00000024576	Csnk1a1	3058.86	2109.12	4008.59	1.9006	0.926451	0.0207347	0.0989001
